# Supplementary material for: Genome-Wide Analysis of H3K27me3 in Porcine Embryonic Muscle Development
Source: Front Cell Dev Biol. 2021 Nov 5;9:739321. doi: 10.3389/fcell.2021.739321 (PMC8602352; doi:10.3389/fcell.2021.739321)
Supplement: Supplementary file 2 [file Data_Sheet_2.XLSX]

## Sheet: all
Supplementary Table S2 Expression level of mRNA during embryonic muscle development
Ensembl_id	geneid	d33_TPM	d65_TPM	d90_TPM
ENSSSCG00000051798	MC4R	0.163137	0	0
ENSSSCG00000051797	pseudogene	0	0	0.0168063
ENSSSCG00000051796	protein_coding	0	0	0
ENSSSCG00000051795	pseudogene	0.0248614	0	0.0473504
ENSSSCG00000051794	CHRNB1	45.1882	44.5044	45.9877
ENSSSCG00000051793	lncRNA	0.0100274	0.030359	0.0194556
ENSSSCG00000051792	lncRNA	0.145096	0	0
ENSSSCG00000051791	protein_coding	0.00715085	0.00709073	0.00686474
ENSSSCG00000051790	lncRNA	0.00803554	0.00809297	0.00788283
ENSSSCG00000051789	pseudogene	0.192093	0.0348028	0.220835
ENSSSCG00000051788	lncRNA	7.87469	3.92643	3.52764
ENSSSCG00000051787	lncRNA	0.0356739	0.0988139	0.134243
ENSSSCG00000051786	lncRNA	0.162861	0.0740877	0.0493338
ENSSSCG00000051785	lncRNA	0	0	0
ENSSSCG00000051784	lncRNA	0.0240108	0	0
ENSSSCG00000051783	lncRNA	0.0483005	0	0
ENSSSCG00000051782	lncRNA	0.0218508	0.0194479	0
ENSSSCG00000051781	snoRNA	0	0	0
ENSSSCG00000051780	lncRNA	0.0996303	0.0249491	0
ENSSSCG00000051779	lncRNA	2.44979	1.21278	1.24967
ENSSSCG00000051778	protein_coding	0.0130522	0	0
ENSSSCG00000051777	processed_pseudogene	0	0.057089	0
ENSSSCG00000051776	protein_coding	0.0485165	0.0332802	0.203937
ENSSSCG00000051775	protein_coding	0	0	0
ENSSSCG00000051774	lncRNA	0	0	0
ENSSSCG00000051773	lncRNA	0	0	0.0064917
ENSSSCG00000051772	lncRNA	0.370473	0.185888	0
ENSSSCG00000051771	lncRNA	0	0	0
ENSSSCG00000051770	lncRNA	0.0632943	0.0399464	0.0571881
ENSSSCG00000051768	lncRNA	0	0	0
ENSSSCG00000051767	pseudogene	0.0468079	0	0.0339295
ENSSSCG00000051766	protein_coding	0.0460956	0.00570195	0.0107955
ENSSSCG00000051765	protein_coding	0.0648743	0	0.0519656
ENSSSCG00000051764	pseudogene	0.00679716	0	0.0280095
ENSSSCG00000051763	lncRNA	0.022907	0	0
ENSSSCG00000051762	lncRNA	0	0	0
ENSSSCG00000051761	protein_coding	0.0272057	0	0.0120276
ENSSSCG00000051760	pseudogene	1.38835	0.0744175	0.0405822
ENSSSCG00000051759	protein_coding	0	0	0
ENSSSCG00000051758	lncRNA	0.0177034	0	0.00609281
ENSSSCG00000051757	lncRNA	0.0110686	0.00513784	0.0147721
ENSSSCG00000051756	lncRNA	0.00801948	0.0155743	0.0230959
ENSSSCG00000051755	lncRNA	0	0	0
ENSSSCG00000051754	lncRNA	2.89707	1.53471	1.53688
ENSSSCG00000051752	lncRNA	0.0160994	0.0402805	0.0343209
ENSSSCG00000051750	pseudogene	0.530114	0.0501191	0.159216
ENSSSCG00000051749	OR8B12	0	0	0
ENSSSCG00000051748	lncRNA	0	0	0
ENSSSCG00000051747	pseudogene	0	0	0.00598114
ENSSSCG00000051746	lncRNA	0.32561	0.121295	0.0986726
ENSSSCG00000051745	lncRNA	0.00555118	0.00958838	0.00913296
ENSSSCG00000051744	protein_coding	0	0	0
ENSSSCG00000051743	lncRNA	0	0	0
ENSSSCG00000051742	protein_coding	0.0674915	0.0653933	0.105478
ENSSSCG00000051741	protein_coding	1.18347	0	0
ENSSSCG00000051740	protein_coding	0	0	0
ENSSSCG00000051739	lncRNA	0.0386299	0	0.0185276
ENSSSCG00000051738	pseudogene	0.228095	0.0283351	0.0896705
ENSSSCG00000051737	lncRNA	0.0723972	0.00968184	0
ENSSSCG00000051736	lncRNA	0.108102	0	0
ENSSSCG00000051735	pseudogene	0.00428317	0.00847385	0.00410857
ENSSSCG00000051734	lncRNA	0	0.00894386	0
ENSSSCG00000051733	protein_coding	0.057882	0	0
ENSSSCG00000051732	lncRNA	0	0	0
ENSSSCG00000051731	lncRNA	4.84881	2.26069	1.26175
ENSSSCG00000051730	lncRNA	0	0	0
ENSSSCG00000051729	lncRNA	0	0	0
ENSSSCG00000051728	lncRNA	0	0	0
ENSSSCG00000051727	lncRNA	8.83592	2.30743	1.10416
ENSSSCG00000051726	lncRNA	0.846468	0.795491	0.555302
ENSSSCG00000051725	lncRNA	0	0.017908	0.0170561
ENSSSCG00000051724	protein_coding	0	0	0
ENSSSCG00000051723	lncRNA	0	0	0
ENSSSCG00000051722	protein_coding	0	0	0
ENSSSCG00000051721	pseudogene	0.0471597	0	0.0300335
ENSSSCG00000051720	U2	0	0	0
ENSSSCG00000051719	lncRNA	0	0.0226195	0
ENSSSCG00000051718	lncRNA	0	0	0
ENSSSCG00000051717	lncRNA	0.632281	0.223312	0.184249
ENSSSCG00000051716	lncRNA	0	0.209185	0.0461612
ENSSSCG00000051715	protein_coding	0.354427	0.0993439	0.149262
ENSSSCG00000051714	lncRNA	0	0	0
ENSSSCG00000051713	protein_coding	0	0	0
ENSSSCG00000051712	processed_pseudogene	0.0384838	0	0
ENSSSCG00000051711	protein_coding	0	0.0173166	0
ENSSSCG00000051710	lncRNA	0.128418	0.0931681	0.121383
ENSSSCG00000051709	lncRNA	0	0	0
ENSSSCG00000051708	protein_coding	0	0	0
ENSSSCG00000051707	lncRNA	0.306502	0.103136	0.183724
ENSSSCG00000051706	processed_pseudogene	0	0	0
ENSSSCG00000051705	protein_coding	0.0672878	0.016217	0.0153986
ENSSSCG00000051704	lncRNA	0.778878	0	0.0560608
ENSSSCG00000051703	pseudogene	0	0	0.00621788
ENSSSCG00000051702	protein_coding	0.232527	0.0538316	0
ENSSSCG00000051701	lncRNA	1.4056	6.21193	3.2201
ENSSSCG00000051700	lncRNA	0.00764026	0.032503	0
ENSSSCG00000051698	lncRNA	0	0	0
ENSSSCG00000051697	protein_coding	0	0	0
ENSSSCG00000051696	lncRNA	0	0.198726	0.789683
ENSSSCG00000051695	lncRNA	0	0	0.0424442
ENSSSCG00000051694	lncRNA	0	0	0
ENSSSCG00000051693	protein_coding	0.050805	0	0
ENSSSCG00000051692	lncRNA	0.254738	0.022558	0.0774425
ENSSSCG00000051691	lncRNA	0.0707552	0.0306462	0
ENSSSCG00000051690	lncRNA	0.0717712	0.0090148	0
ENSSSCG00000051689	protein_coding	0.409521	0.263029	0.247593
ENSSSCG00000051688	lncRNA	0	0.0295365	0
ENSSSCG00000051687	lncRNA	0	0	0.0237263
ENSSSCG00000051686	lncRNA	0.221715	0.101848	0.135223
ENSSSCG00000051685	lncRNA	0	0	0
ENSSSCG00000051684	pseudogene	0.0116142	0	0
ENSSSCG00000051682	lncRNA	1.79594	0.754636	0.597452
ENSSSCG00000051681	protein_coding	0.0230462	0.00706174	0.0139923
ENSSSCG00000051680	IFN-OMEGA-6	3.2545	1.24768	1.32187
ENSSSCG00000051679	lncRNA	0.111301	0.0406945	0.0195006
ENSSSCG00000051678	lncRNA	0	0	0
ENSSSCG00000051677	lncRNA	0	0	0
ENSSSCG00000051676	protein_coding	0	0.00938776	0.018288
ENSSSCG00000051675	protein_coding	0.0130801	0	0
ENSSSCG00000051674	lncRNA	0.0660752	0.0783884	0.00945881
ENSSSCG00000051673	pseudogene	0.0503074	0.0371657	0.0733994
ENSSSCG00000051672	protein_coding	0	0	0
ENSSSCG00000051671	protein_coding	0.179561	0.138143	0.269297
ENSSSCG00000051670	lncRNA	0.381081	0.185823	0.181231
ENSSSCG00000051669	protein_coding	0.114622	0.00561677	0.0805867
ENSSSCG00000051668	lncRNA	1.70406	1.89638	1.89909
ENSSSCG00000051667	processed_pseudogene	0	0.012108	0
ENSSSCG00000051666	lncRNA	0.0110466	0	0.0053023
ENSSSCG00000051665	protein_coding	0	0	0
ENSSSCG00000051664	pseudogene	0.0419458	0	0
ENSSSCG00000051663	lncRNA	17.6144	1.08756	0.600966
ENSSSCG00000051662	lncRNA	0.0207628	0	0.0196119
ENSSSCG00000051661	lncRNA	1.08579	0.633351	1.23875
ENSSSCG00000051660	lncRNA	0	0	0
ENSSSCG00000051659	lncRNA	0.0748524	0.0136839	0
ENSSSCG00000051658	protein_coding	0	0	0
ENSSSCG00000051656	lncRNA	0.0456377	0	0.0875547
ENSSSCG00000051655	lncRNA	0	0	0
ENSSSCG00000051654	lncRNA	0	0	0
ENSSSCG00000051653	lncRNA	0	0	0
ENSSSCG00000051652	lncRNA	0	0	0.0167647
ENSSSCG00000051651	protein_coding	0	0	0
ENSSSCG00000051649	lncRNA	0.228189	0	0
ENSSSCG00000051648	lncRNA	0.101447	0.00718202	0
ENSSSCG00000051647	TMEM81	0.327611	0.172955	0.170045
ENSSSCG00000051646	lncRNA	0	0	0
ENSSSCG00000051645	lncRNA	0.0773437	0.153374	0.130792
ENSSSCG00000051644	protein_coding	0	0	0
ENSSSCG00000051643	lncRNA	0.0113044	0	0
ENSSSCG00000051642	lncRNA	0.089355	0	0
ENSSSCG00000051641	processed_pseudogene	0	0	0
ENSSSCG00000051640	protein_coding	0.0755617	0	0.0050393
ENSSSCG00000051638	lncRNA	0.010997	0.0111094	0.0160624
ENSSSCG00000051637	pseudogene	1.78647	0.390112	0.545895
ENSSSCG00000051636	lncRNA	0.0789822	0	0.0132477
ENSSSCG00000051635	lncRNA	0.0734736	0.02604	0.14966
ENSSSCG00000051634	lncRNA	13.3602	6.35728	7.21414
ENSSSCG00000051633	lncRNA	0.123652	0.220228	0.239721
ENSSSCG00000051632	pseudogene	0	0.0152377	0.0451472
ENSSSCG00000051631	protein_coding	0	0	0
ENSSSCG00000051630	lncRNA	0.748	0.372176	0.24861
ENSSSCG00000051629	lncRNA	0.173723	0.213077	0.206282
ENSSSCG00000051628	lncRNA	1.6357	0.734827	0.902304
ENSSSCG00000051627	lncRNA	0	0	0
ENSSSCG00000051626	pseudogene	0.163638	0.0698693	0.124935
ENSSSCG00000051625	lncRNA	1.30325	0.664085	0.547882
ENSSSCG00000051624	lncRNA	0.115897	0	0
ENSSSCG00000051623	lncRNA	0.013221	0.0200138	0.0317844
ENSSSCG00000051622	lncRNA	0.0377578	0	0
ENSSSCG00000051620	lncRNA	0	0	0
ENSSSCG00000051619	lncRNA	0.408089	0.259582	0.27505
ENSSSCG00000051618	protein_coding	25.1354	21.8369	19.9135
ENSSSCG00000051617	lncRNA	0	0.0200896	0.00998257
ENSSSCG00000051615	lncRNA	0.214751	0.0782017	0.252435
ENSSSCG00000051614	protein_coding	0.0639304	0	0
ENSSSCG00000051613	protein_coding	0	0	0
ENSSSCG00000051612	lncRNA	0.152201	0.266191	0.140716
ENSSSCG00000051611	lncRNA	0.104676	0.0462599	0.0525326
ENSSSCG00000051610	lncRNA	0.053263	0.0504518	0.0459234
ENSSSCG00000051609	lncRNA	0.0142982	0.00451194	0.00859459
ENSSSCG00000051608	protein_coding	0	0	0
ENSSSCG00000051607	lncRNA	0.15257	0.0504677	0.185561
ENSSSCG00000051606	pseudogene	0	0	0
ENSSSCG00000051605	lncRNA	0	0	0
ENSSSCG00000051604	lncRNA	0	0	0
ENSSSCG00000051603	lncRNA	0.0356001	0.00437698	0
ENSSSCG00000051602	lncRNA	0.00738689	0	0
ENSSSCG00000051601	lncRNA	2.52293	1.08696	1.08112
ENSSSCG00000051600	lncRNA	0.134295	1.20704	2.15161
ENSSSCG00000051599	lncRNA	0.848367	0.402672	0.518379
ENSSSCG00000051598	protein_coding	0.00629709	0	0.00617742
ENSSSCG00000051597	lncRNA	0.0119776	0	0
ENSSSCG00000051596	pseudogene	0.0646704	0.0559496	0.085339
ENSSSCG00000051595	lncRNA	0.0174383	0	0.0111516
ENSSSCG00000051594	lncRNA	0	0	0
ENSSSCG00000051593	lncRNA	0	0.00861617	0.0164639
ENSSSCG00000051592	lncRNA	0.440675	0.189767	0.229229
ENSSSCG00000051591	protein_coding	0	0.0103265	0
ENSSSCG00000051590	lncRNA	1.30977	0.550368	0.417468
ENSSSCG00000051589	miRNA	0	0	0
ENSSSCG00000051588	lncRNA	0.0395829	0.0217207	0.0126785
ENSSSCG00000051587	protein_coding	0	0	0
ENSSSCG00000051586	lncRNA	2.34941	1.67562	1.22482
ENSSSCG00000051585	TANGO6	6.49392	5.05952	4.98538
ENSSSCG00000051584	lncRNA	0.144683	0.155376	0.34617
ENSSSCG00000051583	lncRNA	0.339385	0.242429	0.262966
ENSSSCG00000051582	lncRNA	0.0709112	0	0
ENSSSCG00000051581	protein_coding	0.0267713	0.0173575	0.016813
ENSSSCG00000051580	lncRNA	12.2162	0.534261	0.478611
ENSSSCG00000051579	lncRNA	0	0	0
ENSSSCG00000051578	protein_coding	0	0	0
ENSSSCG00000051577	lncRNA	0	0.0181897	0.0867302
ENSSSCG00000051576	pseudogene	0	0	0
ENSSSCG00000051575	lncRNA	0.306135	0.118915	0.0757379
ENSSSCG00000051574	lncRNA	0	0.245029	0.0158659
ENSSSCG00000051573	lncRNA	0	0	0
ENSSSCG00000051572	lncRNA	0.0157884	0	0
ENSSSCG00000051571	lncRNA	0.0769209	0.0491412	0.0655062
ENSSSCG00000051570	protein_coding	0.0594069	0.0336109	0.0109303
ENSSSCG00000051569	protein_coding	0	0	0
ENSSSCG00000051568	lncRNA	0	0	0
ENSSSCG00000051567	lncRNA	0	0	0
ENSSSCG00000051566	lncRNA	0	0.0129704	0
ENSSSCG00000051565	lncRNA	5.44155	7.00578	6.49405
ENSSSCG00000051564	lncRNA	0.443188	0.175787	0.302722
ENSSSCG00000051563	lncRNA	0	0	0
ENSSSCG00000051562	lncRNA	0	0	0
ENSSSCG00000051561	protein_coding	3.33566	1.41498	1.16867
ENSSSCG00000051560	lncRNA	0	0	0
ENSSSCG00000051559	protein_coding	0	0	0
ENSSSCG00000051558	SYCP2L	0	0	0.0609475
ENSSSCG00000051557	lncRNA	0.943844	0.677506	1.02757
ENSSSCG00000051556	lncRNA	0.0102238	0	0
ENSSSCG00000051555	lncRNA	0.403154	0.508681	0.882973
ENSSSCG00000051554	lncRNA	0	0	0
ENSSSCG00000051552	lncRNA	48.175	34.513	27.6587
ENSSSCG00000051551	U2	0	0	0
ENSSSCG00000051550	protein_coding	0	0	0
ENSSSCG00000051549	lncRNA	0.0387606	0.0140349	0.107319
ENSSSCG00000051548	protein_coding	0	0	0
ENSSSCG00000051547	pseudogene	0.0192195	0	0
ENSSSCG00000051545	lncRNA	0	0	0.00609866
ENSSSCG00000051544	lncRNA	0	0	0
ENSSSCG00000051543	protein_coding	0.0065848	0.00667232	0.00645966
ENSSSCG00000051542	lncRNA	0.535533	0.113824	0.49006
ENSSSCG00000051541	lncRNA	0	0.221638	0.112089
ENSSSCG00000051540	lncRNA	0	0	0
ENSSSCG00000051537	protein_coding	0	0	0
ENSSSCG00000051536	pseudogene	0.0485446	0.0864151	0.132942
ENSSSCG00000051535	lncRNA	0.279196	0.0702978	0.269752
ENSSSCG00000051534	lncRNA	0.677392	0.0661994	0.146068
ENSSSCG00000051533	protein_coding	32.4259	25.2244	12.7763
ENSSSCG00000051532	lncRNA	0.553755	0.278492	0.419897
ENSSSCG00000051531	lncRNA	0.00645573	0.0223693	0
ENSSSCG00000051530	lncRNA	0.0456854	0.0442063	0.052549
ENSSSCG00000051529	lncRNA	0.0473316	0.735803	1.07996
ENSSSCG00000051527	lncRNA	0	0.0288796	0.0546779
ENSSSCG00000051526	lncRNA	0.641549	4.77562	9.89032
ENSSSCG00000051525	lncRNA	0.0576632	0	0
ENSSSCG00000051524	lncRNA	2.60088	0.947763	0.124013
ENSSSCG00000051523	lncRNA	0.896113	0.42082	1.44051
ENSSSCG00000051522	lncRNA	0.120606	0.0344895	0.0164244
ENSSSCG00000051521	pseudogene	0	0	0
ENSSSCG00000051520	lncRNA	0.0364153	0.0113376	0.0214655
ENSSSCG00000051519	protein_coding	0	0	0
ENSSSCG00000051518	lncRNA	0.0161232	0	0
ENSSSCG00000051517	protein_coding	0	0.0048242	0
ENSSSCG00000051516	lncRNA	0.0254987	0	0
ENSSSCG00000051515	lncRNA	0	0	0
ENSSSCG00000051514	lncRNA	0	0	0
ENSSSCG00000051513	lncRNA	0	0	0
ENSSSCG00000051512	lncRNA	0.335991	0.704315	1.42785
ENSSSCG00000051511	lncRNA	2.32958	2.20042	1.30098
ENSSSCG00000051509	lncRNA	0.0321123	0.030039	0.126464
ENSSSCG00000051508	lncRNA	0.272987	0.0508876	0.040116
ENSSSCG00000051507	lncRNA	0	0	0
ENSSSCG00000051506	protein_coding	0.36268	0.0868386	0.15583
ENSSSCG00000051505	lncRNA	0	0	0.00575338
ENSSSCG00000051504	lncRNA	0.0140721	0.0139538	0.0135091
ENSSSCG00000051503	lncRNA	0.0601774	0.0379447	0.0365595
ENSSSCG00000051502	lncRNA	0	0	0.00529908
ENSSSCG00000051501	lncRNA	0.0143944	0.0139807	0
ENSSSCG00000051500	lncRNA	0.0173055	0.0175355	0
ENSSSCG00000051499	lncRNA	0	0	0.0102799
ENSSSCG00000051498	lncRNA	0	0.0143165	0
ENSSSCG00000051497	lncRNA	0.874619	0.0391581	0.0677824
ENSSSCG00000051496	protein_coding	0	0	0
ENSSSCG00000051495	lncRNA	0	0	0
ENSSSCG00000051494	lncRNA	0.0171867	0	0.00545555
ENSSSCG00000051493	lncRNA	0.453671	0.419672	0.457524
ENSSSCG00000051492	lncRNA	0.0483661	0	0
ENSSSCG00000051491	lncRNA	21.5935	7.35684	6.36171
ENSSSCG00000051490	lncRNA	0.139979	0	0.0132248
ENSSSCG00000051489	protein_coding	0.0727845	0.0478946	0
ENSSSCG00000051488	lncRNA	0.0554797	0	0
ENSSSCG00000051487	lncRNA	0	0	0
ENSSSCG00000051486	protein_coding	0.359305	0.0185634	0.0917253
ENSSSCG00000051485	pseudogene	0	0	0.00885997
ENSSSCG00000051484	lncRNA	0	0.0257441	0.0514276
ENSSSCG00000051483	lncRNA	0	0	0
ENSSSCG00000051482	lncRNA	4.90032	1.34303	1.66681
ENSSSCG00000051481	lncRNA	0	0	0
ENSSSCG00000051480	U2	1.46808	0.277466	1.31928
ENSSSCG00000051479	lncRNA	0.0454244	0.0145212	0.0138325
ENSSSCG00000051478	processed_pseudogene	0.0138619	0.013961	0
ENSSSCG00000051477	lncRNA	0.0332066	0	0.0318529
ENSSSCG00000051476	lncRNA	0.0267959	0.0530779	0.025505
ENSSSCG00000051475	protein_coding	0	0	0
ENSSSCG00000051474	lncRNA	0	0	0.0245604
ENSSSCG00000051473	lncRNA	0.616587	0.3256	0.704217
ENSSSCG00000051472	pseudogene	0.0318634	0.00739519	0.0140868
ENSSSCG00000051471	protein_coding	0	0	0
ENSSSCG00000051470	lncRNA	0	0	0
ENSSSCG00000051469	pseudogene	0.00921854	0.00876185	0.0086534
ENSSSCG00000051468	lncRNA	0	0	0
ENSSSCG00000051467	processed_pseudogene	0	0	0
ENSSSCG00000051466	lncRNA	0.256362	0.165074	0.126799
ENSSSCG00000051465	lncRNA	0	0	0
ENSSSCG00000051464	lncRNA	0.0129255	0	0
ENSSSCG00000051463	protein_coding	0	0.0189111	0
ENSSSCG00000051462	lncRNA	0.674357	0.132053	0.512499
ENSSSCG00000051461	protein_coding	0	0	0
ENSSSCG00000051460	lncRNA	0	0	0.010149
ENSSSCG00000051459	lncRNA	0.427284	0.0894763	0.0439768
ENSSSCG00000051458	lncRNA	0.143176	0.1486	0.0829139
ENSSSCG00000051457	lncRNA	0.00603557	0	0
ENSSSCG00000051456	lncRNA	0	0.00549033	0
ENSSSCG00000051455	pseudogene	0	0	0
ENSSSCG00000051454	lncRNA	0.302541	0.0949428	0.0733207
ENSSSCG00000051453	lncRNA	0.154783	0	0.139964
ENSSSCG00000051452	protein_coding	0.0118877	0	0
ENSSSCG00000051451	lncRNA	1.86513	1.21045	0.387706
ENSSSCG00000051450	lncRNA	0.0344193	0.0321485	0
ENSSSCG00000051449	lncRNA	0	0	0
ENSSSCG00000051448	pseudogene	0	0	0
ENSSSCG00000051447	lncRNA	0	0	0
ENSSSCG00000051446	lncRNA	0.038456	0.0766203	0.124154
ENSSSCG00000051445	protein_coding	0.0353851	0	0.0341993
ENSSSCG00000051444	lncRNA	2.69605	0.0334917	0.0634101
ENSSSCG00000051443	lncRNA	0.110842	0.03359	0
ENSSSCG00000051442	lncRNA	1.40035	0.574775	0.859359
ENSSSCG00000051441	lncRNA	0.928896	0.215703	0.0887271
ENSSSCG00000051440	lncRNA	0.0136461	0	0.00603292
ENSSSCG00000051438	lncRNA	2.08832	1.16664	1.01462
ENSSSCG00000051437	lncRNA	0	0	0
ENSSSCG00000051436	pseudogene	0	0	0
ENSSSCG00000051435	protein_coding	0.0187819	0	0.0154984
ENSSSCG00000051434	lncRNA	0.114361	0.0471158	0.0234736
ENSSSCG00000051433	pseudogene	0.0730096	0.0269293	0.042941
ENSSSCG00000051432	lncRNA	0.92604	0.952604	0.795158
ENSSSCG00000051431	lncRNA	0.211555	0.122795	0.152273
ENSSSCG00000051430	lncRNA	0.0431223	0	0.0211514
ENSSSCG00000051429	protein_coding	44.2489	9.47542	7.24337
ENSSSCG00000051428	lncRNA	0.467917	0.351061	0.372192
ENSSSCG00000051427	lncRNA	0.25906	0.112296	0.219041
ENSSSCG00000051426	lncRNA	0.716158	0.179691	0.756684
ENSSSCG00000051425	lncRNA	0	0	0
ENSSSCG00000051424	lncRNA	0	0	0
ENSSSCG00000051423	lncRNA	0	0.00836947	0.00845339
ENSSSCG00000051422	protein_coding	0.0966172	0	0.045347
ENSSSCG00000051421	lncRNA	0.117154	0.680446	0.608631
ENSSSCG00000051420	lncRNA	0.0186929	0	0.0176567
ENSSSCG00000051419	pseudogene	8.00945	5.56939	11.2619
ENSSSCG00000051418	lncRNA	1.86908	2.09335	1.72231
ENSSSCG00000051417	lncRNA	0.037944	0.0121955	0
ENSSSCG00000051416	lncRNA	0.0320625	0.0119966	0.0299633
ENSSSCG00000051415	protein_coding	0	0	0
ENSSSCG00000051414	lncRNA	0	0.00700877	0
ENSSSCG00000051413	protein_coding	0	0	0
ENSSSCG00000051412	lncRNA	1.37451	1.71696	0.85719
ENSSSCG00000051411	lncRNA	0.171452	0.0774339	0
ENSSSCG00000051410	protein_coding	0	0	0
ENSSSCG00000051409	protein_coding	0	0	0
ENSSSCG00000051408	lncRNA	0.0788646	0.0790134	0.151496
ENSSSCG00000051407	lncRNA	0.0133846	0.0111136	0
ENSSSCG00000051406	lncRNA	0.185566	0.322229	0.611841
ENSSSCG00000051405	lncRNA	0.104748	0.0372943	0.0895253
ENSSSCG00000051404	lncRNA	0	0	0
ENSSSCG00000051403	lncRNA	0.0729136	0.0373878	0.0852571
ENSSSCG00000051402	protein_coding	0	0	0
ENSSSCG00000051401	pseudogene	0.0055396	0	0
ENSSSCG00000051400	lncRNA	0.0342459	0.730315	0.37383
ENSSSCG00000051399	protein_coding	0.0684728	0.0394578	0.0760672
ENSSSCG00000051398	protein_coding	0	0	0.130151
ENSSSCG00000051397	protein_coding	0.187545	0.0421535	0.109886
ENSSSCG00000051396	protein_coding	0.295594	0.130475	0.269597
ENSSSCG00000051395	protein_coding	0	0	0
ENSSSCG00000051394	lncRNA	0	0	0
ENSSSCG00000051393	lncRNA	0.202024	0.0739841	0.161489
ENSSSCG00000051392	protein_coding	0.0161147	0.0162299	0.00772891
ENSSSCG00000051391	protein_coding	0	0	0
ENSSSCG00000051390	lncRNA	0.305256	0.314812	0.202472
ENSSSCG00000051389	lncRNA	0	0	0
ENSSSCG00000051388	protein_coding	0.100578	0	0
ENSSSCG00000051387	lncRNA	0.0877464	0.0316084	0
ENSSSCG00000051386	lncRNA	0.0552792	0.00776518	0.0448028
ENSSSCG00000051385	protein_coding	0	0	0
ENSSSCG00000051384	lncRNA	0.0170222	0	0
ENSSSCG00000051383	protein_coding	0	0	0
ENSSSCG00000051382	lncRNA	1.62723	4.11908	1.14569
ENSSSCG00000051381	protein_coding	0.220314	0	0
ENSSSCG00000051380	lncRNA	0.632732	0.383645	0.616349
ENSSSCG00000051379	processed_pseudogene	0.0282969	0	0.0271433
ENSSSCG00000051378	lncRNA	0	0	0
ENSSSCG00000051377	protein_coding	0.0251622	0	0
ENSSSCG00000051376	lncRNA	0.0369935	0	0.020089
ENSSSCG00000051375	protein_coding	0	0	0
ENSSSCG00000051374	lncRNA	0	0	0.0127594
ENSSSCG00000051373	protein_coding	0	0	0
ENSSSCG00000051372	lncRNA	0	0	0
ENSSSCG00000051371	lncRNA	0.0911142	0	0
ENSSSCG00000051370	lncRNA	0.019738	0	0.0189334
ENSSSCG00000051369	lncRNA	1.1524	1.05339	1.1812
ENSSSCG00000051368	CA9	3.37224	1.96117	2.28925
ENSSSCG00000051367	protein_coding	0	0	0
ENSSSCG00000051366	protein_coding	0.0991142	0.0105131	0.0199046
ENSSSCG00000051365	lncRNA	0.140201	0.0810869	0.0825744
ENSSSCG00000051364	processed_pseudogene	0.0137788	0	0
ENSSSCG00000051363	lncRNA	0.00442158	0.0349424	0.0251434
ENSSSCG00000051362	lncRNA	0	0.00741937	0.0146551
ENSSSCG00000051361	lncRNA	0.0710758	0	0.0108727
ENSSSCG00000051360	lncRNA	0	0.08577	0
ENSSSCG00000051359	NIPSNAP1	0	0	0
ENSSSCG00000051358	lncRNA	0	0	0
ENSSSCG00000051357	protein_coding	0	0	0
ENSSSCG00000051356	processed_pseudogene	0.0452603	0.0194847	0
ENSSSCG00000051355	lncRNA	0	0	0
ENSSSCG00000051354	lncRNA	0.335771	0.25912	0.393529
ENSSSCG00000051353	lncRNA	0.0128189	0	0.0228244
ENSSSCG00000051352	protein_coding	0.00514414	0.0103618	0.00989976
ENSSSCG00000051351	protein_coding	0	0	0
ENSSSCG00000051350	lncRNA	0.0134635	0	0
ENSSSCG00000051349	protein_coding	0.00782361	0.00787953	0.00767493
ENSSSCG00000051348	protein_coding	0.09647	0	1.3108
ENSSSCG00000051347	pseudogene	0	0	0
ENSSSCG00000051346	lncRNA	0	0	0
ENSSSCG00000051345	protein_coding	0	0	0
ENSSSCG00000051344	protein_coding	0.0455338	0	0.00720083
ENSSSCG00000051343	protein_coding	0	0	0
ENSSSCG00000051342	protein_coding	0	0	0.01463
ENSSSCG00000051341	protein_coding	0	0	0
ENSSSCG00000051340	lncRNA	0.419628	0.0581267	0.136567
ENSSSCG00000051339	lncRNA	0.0935918	0.0454617	0.0704597
ENSSSCG00000051338	lncRNA	0.0177718	0.0073782	0
ENSSSCG00000051337	lncRNA	0	0	0
ENSSSCG00000051336	lncRNA	0.582307	0.0901624	0.0658068
ENSSSCG00000051334	lncRNA	0	0	0
ENSSSCG00000051333	lncRNA	0.132892	0.108358	0.124023
ENSSSCG00000051332	pseudogene	0.0584894	0.0098419	0.075169
ENSSSCG00000051331	protein_coding	0	0	0
ENSSSCG00000051330	lncRNA	0.734892	1.46929	1.43117
ENSSSCG00000051329	lncRNA	1.39131	1.02468	1.46045
ENSSSCG00000051328	lncRNA	0	0	0
ENSSSCG00000051327	protein_coding	0.00612061	0.0245129	0.0645821
ENSSSCG00000051326	processed_pseudogene	0	0	0
ENSSSCG00000051325	lncRNA	0.907806	0.934351	0.913502
ENSSSCG00000051324	lncRNA	0.0209767	0	0.00670719
ENSSSCG00000051323	pseudogene	0	0.183009	0.43749
ENSSSCG00000051322	protein_coding	0.0169673	0	0
ENSSSCG00000051319	lncRNA	0	0	0
ENSSSCG00000051318	lncRNA	0.0104885	0	0.00879621
ENSSSCG00000051317	lncRNA	0.148187	0.230048	0.405754
ENSSSCG00000051316	lncRNA	0.62801	0.10038	0.0725668
ENSSSCG00000051315	lncRNA	0.439138	0.298293	0.115401
ENSSSCG00000051314	processed_pseudogene	0	0	0
ENSSSCG00000051313	lncRNA	1.56051	0.894391	0.773866
ENSSSCG00000051312	lncRNA	0.0229359	0	0
ENSSSCG00000051311	protein_coding	1.00704	0.264505	0.317276
ENSSSCG00000051310	lncRNA	0	0	0
ENSSSCG00000051309	processed_pseudogene	0	0	0
ENSSSCG00000051308	lncRNA	0	0	0
ENSSSCG00000051307	protein_coding	0.0262325	0	0
ENSSSCG00000051306	protein_coding	0	0.0211503	0
ENSSSCG00000051305	lncRNA	0	0	0
ENSSSCG00000051304	lncRNA	0.105266	0.074079	0.0543114
ENSSSCG00000051303	lncRNA	0	0	0
ENSSSCG00000051302	lncRNA	0.157944	0.129606	0.12635
ENSSSCG00000051301	lncRNA	1.39376	0.38908	0.608733
ENSSSCG00000051300	lncRNA	0.274131	1.25699	0.0883455
ENSSSCG00000051299	protein_coding	0	0	0
ENSSSCG00000051298	lncRNA	0.139151	0.568282	0.157745
ENSSSCG00000051297	lncRNA	0.176141	0.0437538	0.140783
ENSSSCG00000051296	lncRNA	1.04523	1.77251	2.17809
ENSSSCG00000051295	protein_coding	0	0	0
ENSSSCG00000051294	lncRNA	0.0110172	0.00477187	0.0136544
ENSSSCG00000051293	lncRNA	8.04045	5.55907	5.38821
ENSSSCG00000051292	lncRNA	0.0710544	0	0
ENSSSCG00000051291	protein_coding	15.2368	10.083	10.6424
ENSSSCG00000051290	lncRNA	0.715733	0.378555	0.431233
ENSSSCG00000051289	lncRNA	0.0385393	0.0130172	0.222089
ENSSSCG00000051288	protein_coding	0.00623718	0	0.00511479
ENSSSCG00000051287	lncRNA	1.23455	0.609252	0.442399
ENSSSCG00000051286	protein_coding	0	0	0
ENSSSCG00000051285	protein_coding	0	0	0
ENSSSCG00000051284	lncRNA	0.0190187	0.0182991	0.0120741
ENSSSCG00000051283	lncRNA	0.0287809	0.010148	0.0202212
ENSSSCG00000051282	lncRNA	0.0402085	0.0399748	0.054881
ENSSSCG00000051280	lncRNA	0	0	0.047824
ENSSSCG00000051279	protein_coding	0.0777817	0.0401428	0.0763778
ENSSSCG00000051278	lncRNA	0	0	0
ENSSSCG00000051277	protein_coding	0	0	0
ENSSSCG00000051276	pseudogene	0.953449	0.292171	0.400868
ENSSSCG00000051275	lncRNA	0.078625	0	0.0735416
ENSSSCG00000051274	lncRNA	151.145	187.55	278.643
ENSSSCG00000051273	lncRNA	0.0682908	0	0
ENSSSCG00000051272	lncRNA	0.0301426	0.057302	0.0068622
ENSSSCG00000051271	processed_pseudogene	0	0	0
ENSSSCG00000051270	lncRNA	0.281068	0.0176757	0.0336723
ENSSSCG00000051269	pseudogene	0.133678	0.0556665	0.170764
ENSSSCG00000051267	lncRNA	0	0	0
ENSSSCG00000051266	lncRNA	0.641661	0.271758	0.493635
ENSSSCG00000051265	C5orf58	0.106899	0	0
ENSSSCG00000051263	lncRNA	3.6923	4.75854	4.42053
ENSSSCG00000051262	lncRNA	0.00571204	0	0.0110827
ENSSSCG00000051261	lncRNA	0	0.00510129	0.00488901
ENSSSCG00000051259	lncRNA	0.0337737	0	0
ENSSSCG00000051258	pseudogene	0	0	0.034661
ENSSSCG00000051257	lncRNA	2.0449	0.757545	1.85273
ENSSSCG00000051256	lncRNA	0	0.0672643	0.258997
ENSSSCG00000051255	lncRNA	0.0285041	0	0
ENSSSCG00000051254	protein_coding	0.20034	0.0417625	0.0649867
ENSSSCG00000051253	lncRNA	0.0906617	0.0876968	0.20976
ENSSSCG00000051252	pseudogene	153.746	129.37	122.965
ENSSSCG00000051251	lncRNA	0	0	0
ENSSSCG00000051250	lncRNA	0	0	0
ENSSSCG00000051249	lncRNA	0.0365269	0.0399497	0.0322075
ENSSSCG00000051248	lncRNA	0	0	0
ENSSSCG00000051247	protein_coding	0	0	0
ENSSSCG00000051246	lncRNA	0.0361952	0	0.0114068
ENSSSCG00000051244	lncRNA	1.01046	1.61724	0.684253
ENSSSCG00000051243	protein_coding	0.0976445	0.0627312	0.146945
ENSSSCG00000051242	pseudogene	0	0	0
ENSSSCG00000051241	protein_coding	0	0	0
ENSSSCG00000051240	protein_coding	0.279052	0	0
ENSSSCG00000051239	lncRNA	0.0756928	0.00832462	0.0157611
ENSSSCG00000051238	lncRNA	1.10632	0.045956	0.273104
ENSSSCG00000051237	pseudogene	0.348923	0.0350202	0.0560844
ENSSSCG00000051236	lncRNA	0.0259108	0	0
ENSSSCG00000051235	lncRNA	0.888286	0.210268	0.550497
ENSSSCG00000051234	lncRNA	0.0830139	0.134529	0.122438
ENSSSCG00000051233	lncRNA	0.101653	0.160738	0.153812
ENSSSCG00000051232	lncRNA	8.5873	11.4974	7.7768
ENSSSCG00000051231	lncRNA	0.316792	0.132197	0.0379189
ENSSSCG00000051230	pseudogene	0.0202604	0	0
ENSSSCG00000051229	protein_coding	0	0	0
ENSSSCG00000051228	snoRNA	0	0	0
ENSSSCG00000051227	protein_coding	0.065314	0.0581314	0.0186388
ENSSSCG00000051226	lncRNA	0.0317097	0.00431275	0.0329538
ENSSSCG00000051225	pseudogene	0.072349	0.0872722	0.161557
ENSSSCG00000051224	pseudogene	0.0366513	0.0181716	0
ENSSSCG00000051223	lncRNA	0.0318832	0	0
ENSSSCG00000051222	protein_coding	0	0	0
ENSSSCG00000051221	lncRNA	0.749452	0.0352942	0.0273588
ENSSSCG00000051220	lncRNA	0	0	0
ENSSSCG00000051219	lncRNA	2.16398	1.68257	1.50995
ENSSSCG00000051218	lncRNA	0.0681496	0	0.112471
ENSSSCG00000051217	lncRNA	0	0	0.00737195
ENSSSCG00000051216	lncRNA	0.115281	0	0
ENSSSCG00000051215	protein_coding	0	0	0
ENSSSCG00000051214	lncRNA	0.0659568	0	0.00678868
ENSSSCG00000051213	protein_coding	0.417831	0.0654817	0.0127806
ENSSSCG00000051212	lncRNA	0.0307984	0.0266794	0.0258291
ENSSSCG00000051211	lncRNA	0.0136032	0.0117125	0.0565356
ENSSSCG00000051210	lncRNA	0.036181	0.016916	0.0122495
ENSSSCG00000051209	lncRNA	0.0571371	0.0455972	0.0376548
ENSSSCG00000051208	lncRNA	0.936568	0.619655	0.86975
ENSSSCG00000051207	lncRNA	0.0510546	0.0452067	0.174741
ENSSSCG00000051206	protein_coding	0	0	0
ENSSSCG00000051205	P2RX4	8.31391	5.70323	4.12048
ENSSSCG00000051204	protein_coding	0	0	0
ENSSSCG00000051203	protein_coding	0	0	0
ENSSSCG00000051202	lncRNA	0.00654369	0.0259154	0.0125638
ENSSSCG00000051201	lncRNA	0.541733	0	0.0493444
ENSSSCG00000051200	lncRNA	0	0	0
ENSSSCG00000051199	lncRNA	0.0309586	0	0
ENSSSCG00000051198	lncRNA	0	0	0
ENSSSCG00000051197	lncRNA	0	0	0
ENSSSCG00000051196	lncRNA	0.0276747	0.0215573	0.0526327
ENSSSCG00000051195	protein_coding	0	0	0
ENSSSCG00000051194	lncRNA	0.823143	0.564586	1.22857
ENSSSCG00000051193	lncRNA	27.1474	2.09024	3.428
ENSSSCG00000051192	lncRNA	0.172802	0.16507	0.054183
ENSSSCG00000051191	lncRNA	0	0	0
ENSSSCG00000051190	lncRNA	0.0137788	0	0.00664989
ENSSSCG00000051189	lncRNA	0.0626716	0	0
ENSSSCG00000051188	protein_coding	0.0391144	0	0.0367165
ENSSSCG00000051187	protein_coding	0.173247	0.0503895	0.168096
ENSSSCG00000051186	lncRNA	0.143581	0	0.0147782
ENSSSCG00000051185	lncRNA	0.0112083	0	0.0107514
ENSSSCG00000051184	protein_coding	0.10312	0.0720915	0.0227946
ENSSSCG00000051183	lncRNA	0	0	0.0194013
ENSSSCG00000051182	lncRNA	0	0	0
ENSSSCG00000051181	lncRNA	0.0284325	0.0552305	0.110502
ENSSSCG00000051180	processed_pseudogene	0	0	0
ENSSSCG00000051179	protein_coding	0	0	0
ENSSSCG00000051178	pseudogene	0.214022	0.0500399	0.0644376
ENSSSCG00000051177	protein_coding	0.00932114	0.0278287	0.00899712
ENSSSCG00000051176	lncRNA	0.0791149	0.0380189	0.0728313
ENSSSCG00000051175	lncRNA	0	0	0.00567403
ENSSSCG00000051174	lncRNA	0	0	0.0184182
ENSSSCG00000051173	lncRNA	0.0136548	0	0
ENSSSCG00000051172	lncRNA	0.196001	0.381666	0.380748
ENSSSCG00000051171	lncRNA	0.065368	0	0.0182737
ENSSSCG00000051170	lncRNA	0.00648405	0	0.00636083
ENSSSCG00000051169	protein_coding	0	0	0
ENSSSCG00000051167	lncRNA	0.061412	0	0
ENSSSCG00000051166	processed_pseudogene	0.0111277	0	0
ENSSSCG00000051165	pseudogene	0.0721832	0.0350485	0.466389
ENSSSCG00000051164	pseudogene	0.00442858	0	0
ENSSSCG00000051163	pseudogene	0.302259	0.0294324	0.152796
ENSSSCG00000051162	protein_coding	0	0	0
ENSSSCG00000051161	lncRNA	0.0388074	0	0
ENSSSCG00000051160	lncRNA	0	0	0
ENSSSCG00000051159	protein_coding	0	0	0.145504
ENSSSCG00000051158	lncRNA	0.0170897	0	0
ENSSSCG00000051157	lncRNA	0	0	0
ENSSSCG00000051156	lncRNA	1.66297	0.232573	0.112562
ENSSSCG00000051155	lncRNA	1.17839	1.98628	2.12179
ENSSSCG00000051154	lncRNA	0.0499799	0	0
ENSSSCG00000051153	lncRNA	0	0	0
ENSSSCG00000051152	lncRNA	0.163096	0.132422	0.191803
ENSSSCG00000051151	lncRNA	1.76912	1.2945	1.28833
ENSSSCG00000051150	lncRNA	0	0	0
ENSSSCG00000051149	lncRNA	0	0	0
ENSSSCG00000051148	pseudogene	0.0270352	0.00953247	0.0141217
ENSSSCG00000051147	lncRNA	0	0	0
ENSSSCG00000051146	lncRNA	0.580892	0.249143	0.250685
ENSSSCG00000051144	protein_coding	0.0163806	0.0068006	0.00675846
ENSSSCG00000051143	lncRNA	0.0416529	0	0
ENSSSCG00000051142	lncRNA	0	0	0
ENSSSCG00000051141	lncRNA	0	0	0
ENSSSCG00000051140	lncRNA	0.0250354	0	0
ENSSSCG00000051138	protein_coding	0	0	0
ENSSSCG00000051137	lncRNA	0	0	0
ENSSSCG00000051136	protein_coding	0.00530197	0	0
ENSSSCG00000051135	protein_coding	0.38754	0.278804	0.0600116
ENSSSCG00000051134	lncRNA	0	0	0
ENSSSCG00000051133	lncRNA	0.00568649	0	0.00557843
ENSSSCG00000051132	protein_coding	0	0	0
ENSSSCG00000051131	lncRNA	0.085558	0.0340924	0.0603918
ENSSSCG00000051130	lncRNA	0.0418003	0	0.0376891
ENSSSCG00000051129	lncRNA	0.0598714	0.0190247	0.00626308
ENSSSCG00000051128	protein_coding	0.0378488	0.0249959	0.0179627
ENSSSCG00000051127	protein_coding	0.114391	0	0
ENSSSCG00000051126	lncRNA	0	0	0
ENSSSCG00000051125	lncRNA	0.296932	0.207403	0.25557
ENSSSCG00000051124	lncRNA	0.163179	0.091319	0.0252552
ENSSSCG00000051123	lncRNA	0.031305	0	0.0293858
ENSSSCG00000051122	protein_coding	0	0	0
ENSSSCG00000051121	lncRNA	0.128239	0.0619581	0.0195905
ENSSSCG00000051120	lncRNA	4.00904	0	0
ENSSSCG00000051119	lncRNA	0.147068	0.135949	0.158322
ENSSSCG00000051118	lncRNA	0.487464	0.241376	0.455535
ENSSSCG00000051117	protein_coding	4.21714	0.212211	0.0928979
ENSSSCG00000051116	lncRNA	0.549369	0.198318	0.0637861
ENSSSCG00000051115	lncRNA	0	0.0605538	0.116687
ENSSSCG00000051114	lncRNA	0	0	0
ENSSSCG00000051113	lncRNA	0	0	0.0517107
ENSSSCG00000051110	protein_coding	0	0	0
ENSSSCG00000051107	lncRNA	0.335613	0.115927	0.307984
ENSSSCG00000051106	lncRNA	0	0	0
ENSSSCG00000051105	lncRNA	0	0	0.0327072
ENSSSCG00000051104	lncRNA	0	0	0
ENSSSCG00000051103	protein_coding	0.0136861	0	0
ENSSSCG00000051102	lncRNA	0	0	0
ENSSSCG00000051101	protein_coding	0	0	0
ENSSSCG00000051100	protein_coding	0	0	0
ENSSSCG00000051099	pseudogene	0	0.0192235	0
ENSSSCG00000051098	protein_coding	0.0214701	0	0.0617847
ENSSSCG00000051097	protein_coding	1.55601	0.292064	0.56116
ENSSSCG00000051095	lncRNA	1.29271	0.842101	0.99264
ENSSSCG00000051094	lncRNA	0	0	0
ENSSSCG00000051093	protein_coding	0.35304	0.0599979	0.0357399
ENSSSCG00000051092	lncRNA	0	0.0186862	0.0117929
ENSSSCG00000051091	protein_coding	0.0643714	0.035508	0.0441167
ENSSSCG00000051090	lncRNA	26.2645	23.5663	19.3677
ENSSSCG00000051089	processed_pseudogene	0	0	0
ENSSSCG00000051088	lncRNA	0.115597	0.0421981	0.0412292
ENSSSCG00000051087	lncRNA	0.0379712	0	0.0722068
ENSSSCG00000051086	lncRNA	0.124052	0.0202303	0.0770386
ENSSSCG00000051085	lncRNA	0	0.0339212	0.0329358
ENSSSCG00000051084	pseudogene	0	0	0
ENSSSCG00000051083	lncRNA	0	0	0
ENSSSCG00000051082	processed_pseudogene	0	0	0
ENSSSCG00000051081	lncRNA	0	0	0
ENSSSCG00000051080	lncRNA	0	0	0
ENSSSCG00000051079	lncRNA	0	0	0
ENSSSCG00000051078	lncRNA	0	0.0307245	0.0292675
ENSSSCG00000051077	lncRNA	0	0.0323624	0.0212673
ENSSSCG00000051076	protein_coding	0	0	0
ENSSSCG00000051075	lncRNA	1.09039	0.105569	0.0341025
ENSSSCG00000051074	lncRNA	0	0	0
ENSSSCG00000051073	lncRNA	0.0777646	0.00728953	0.0723197
ENSSSCG00000051072	lncRNA	0.229664	0	0
ENSSSCG00000051071	lncRNA	0.316538	1.2306	3.44767
ENSSSCG00000051070	lncRNA	5.09231	9.37232	15.0618
ENSSSCG00000051069	lncRNA	0.0192186	0.00957326	0.00911784
ENSSSCG00000051068	lncRNA	0.119447	0.077259	0.0374418
ENSSSCG00000051067	lncRNA	1.50339	2.55412	2.10044
ENSSSCG00000051066	lncRNA	0.132331	0.0478601	0.0759486
ENSSSCG00000051065	lncRNA	0.0626057	0.100265	0.163853
ENSSSCG00000051064	lncRNA	0.0118146	0.0118991	0
ENSSSCG00000051063	lncRNA	0.0867689	0.121371	0.319563
ENSSSCG00000051062	lncRNA	0	0	0
ENSSSCG00000051061	lncRNA	0.349315	0.0435005	0.126765
ENSSSCG00000051060	lncRNA	0	0	0
ENSSSCG00000051059	pseudogene	0.0249457	0	0.0122358
ENSSSCG00000051058	lncRNA	0.617894	0.0683317	0.0497246
ENSSSCG00000051057	lncRNA	0.297871	0.261086	0.101882
ENSSSCG00000051056	lncRNA	0.0719908	0.027726	0.028004
ENSSSCG00000051055	pseudogene	1.36768	0.338901	0.639108
ENSSSCG00000051054	protein_coding	1.34346	0.0448574	0.176129
ENSSSCG00000051053	lncRNA	0	0	0
ENSSSCG00000051052	lncRNA	0.69581	0.279848	0.301073
ENSSSCG00000051051	lncRNA	0	0	0
ENSSSCG00000051050	lncRNA	0.562593	0.0245225	0.0700677
ENSSSCG00000051049	lncRNA	0.0660936	0.0273662	0.0639337
ENSSSCG00000051047	lncRNA	0.0401925	0.06819	0.132587
ENSSSCG00000051046	pseudogene	0	0	0
ENSSSCG00000051045	lncRNA	0	0	0
ENSSSCG00000051044	protein_coding	0.015837	0.0147024	0
ENSSSCG00000051043	protein_coding	0	0	0
ENSSSCG00000051042	pseudogene	0.0181462	0	0
ENSSSCG00000051041	lncRNA	0.111938	0.0280312	0.21496
ENSSSCG00000051040	protein_coding	0	0	0
ENSSSCG00000051039	lncRNA	0.0390444	0	0.0242336
ENSSSCG00000051038	lncRNA	0.0286383	0	0
ENSSSCG00000051037	lncRNA	0.0109329	0.0755076	0.0529774
ENSSSCG00000051036	lncRNA	0	0	0.0112176
ENSSSCG00000051035	lncRNA	0	0	0
ENSSSCG00000051034	lncRNA	0.0519787	0.00436985	0.0349177
ENSSSCG00000051033	lncRNA	4.90577	5.48191	6.46867
ENSSSCG00000051032	protein_coding	0.101992	0.00536764	0.0511071
ENSSSCG00000051031	protein_coding	0.0500417	0.0240448	0.0233213
ENSSSCG00000051030	protein_coding	0.100827	0.0521633	0.0946251
ENSSSCG00000051029	lncRNA	0.0271871	0	0
ENSSSCG00000051028	lncRNA	0.795861	0.227273	0.883643
ENSSSCG00000051027	lncRNA	0.0138651	0.00690654	0.013156
ENSSSCG00000051026	lncRNA	5.06109	0.663136	0.142702
ENSSSCG00000051025	lncRNA	0	0	0
ENSSSCG00000051024	lncRNA	0.211712	0.304987	0.536754
ENSSSCG00000051023	lncRNA	6.58394	3.01346	3.41063
ENSSSCG00000051022	lncRNA	0.350035	0.0799851	0.179698
ENSSSCG00000051021	protein_coding	0	0	0
ENSSSCG00000051020	pseudogene	0.00612976	0	0.0202208
ENSSSCG00000051019	lncRNA	0.0979212	0	0
ENSSSCG00000051018	lncRNA	0.0944856	0	0
ENSSSCG00000051017	lncRNA	0.00549729	0.00255173	0.00486069
ENSSSCG00000051016	lncRNA	0.325414	1.55437	0.61561
ENSSSCG00000051015	protein_coding	0	0	0
ENSSSCG00000051014	lncRNA	0.0581557	0	0.027466
ENSSSCG00000051012	protein_coding	0.051352	0.00938776	0.009144
ENSSSCG00000051011	lncRNA	0.00590731	0	0.0283679
ENSSSCG00000051010	lncRNA	0.00727666	0	0
ENSSSCG00000051009	lncRNA	0.0230404	0.159553	0.24581
ENSSSCG00000051008	lncRNA	0.0163254	0	0.00800755
ENSSSCG00000051007	lncRNA	0.0496733	0.010952	0.0105178
ENSSSCG00000051006	protein_coding	0.415988	0.170783	0.346827
ENSSSCG00000051005	pseudogene	0.56002	0.346887	0
ENSSSCG00000051004	lncRNA	0.137494	0.0554956	0.093852
ENSSSCG00000051003	lncRNA	0.095722	0.0395633	0.0832556
ENSSSCG00000051001	lncRNA	0	0	0
ENSSSCG00000051000	lncRNA	0	0	0
ENSSSCG00000050999	pseudogene	0	0	0
ENSSSCG00000050998	protein_coding	0.334054	0.160008	0.346891
ENSSSCG00000050997	lncRNA	3.92838	2.46515	1.83864
ENSSSCG00000050996	pseudogene	0.0723617	0	0.0513628
ENSSSCG00000050995	lncRNA	0	0	0
ENSSSCG00000050994	lncRNA	0	0	0.111407
ENSSSCG00000050993	lncRNA	0	0	0
ENSSSCG00000050992	protein_coding	0.00682228	0	0
ENSSSCG00000050991	lncRNA	0.069787	0	0
ENSSSCG00000050990	protein_coding	0.282162	0.0900372	0.0894791
ENSSSCG00000050989	lncRNA	0.0639458	0.0303048	0.042515
ENSSSCG00000050988	lncRNA	0.0286292	0.0973722	0.137928
ENSSSCG00000050987	lncRNA	0.937933	0.545947	1.00029
ENSSSCG00000050986	lncRNA	0.0180149	0.0181437	0.0520578
ENSSSCG00000050985	protein_coding	0.0803139	0	0
ENSSSCG00000050984	lncRNA	0	0.037859	0
ENSSSCG00000050983	lncRNA	0	0.0191153	0.0185061
ENSSSCG00000050982	lncRNA	0	0	0.0368559
ENSSSCG00000050981	pseudogene	0	0.00757968	0
ENSSSCG00000050980	lncRNA	0.0948917	0.0219681	0.0210539
ENSSSCG00000050979	lncRNA	0.0115935	0.00270048	0.0054113
ENSSSCG00000050978	lncRNA	0.0848906	0.113996	0.27362
ENSSSCG00000050977	lncRNA	5.32443	1.59662	0.429993
ENSSSCG00000050976	U2	0.209397	0	0.205417
ENSSSCG00000050975	protein_coding	0	0	0
ENSSSCG00000050974	lncRNA	1.07595	0.607622	1.06518
ENSSSCG00000050973	lncRNA	0	0	0
ENSSSCG00000050972	lncRNA	0	0	0
ENSSSCG00000050971	lncRNA	1.12058	1.00855	3.16732
ENSSSCG00000050970	pseudogene	0	0	0
ENSSSCG00000050969	protein_coding	0.0156079	0	0.00494958
ENSSSCG00000050968	lncRNA	0	0	0
ENSSSCG00000050967	protein_coding	0.0534425	0.00502022	0.0199448
ENSSSCG00000050966	protein_coding	0.0127301	0	0.00597486
ENSSSCG00000050965	pseudogene	0.200791	0.0159297	0.12171
ENSSSCG00000050964	lncRNA	0.108032	0.0363127	0.115625
ENSSSCG00000050963	lncRNA	0.0106198	0	0.0101868
ENSSSCG00000050962	pseudogene	0	0.00872733	0
ENSSSCG00000050961	ssc-mir-10383	4.15093	6.51968	22.2076
ENSSSCG00000050960	lncRNA	0	0	0
ENSSSCG00000050959	lncRNA	0	0.00944556	0.0138717
ENSSSCG00000050958	protein_coding	3.86642	1.88464	1.63299
ENSSSCG00000050957	lncRNA	0.344949	0.123024	0.189567
ENSSSCG00000050956	lncRNA	0.0468001	0	0.0209484
ENSSSCG00000050955	protein_coding	0.103103	0.00564863	0.0376594
ENSSSCG00000050954	lncRNA	0.0787135	0	0
ENSSSCG00000050953	lncRNA	0	0.00738452	0
ENSSSCG00000050952	protein_coding	0.0181248	0	0.0171201
ENSSSCG00000050951	lncRNA	0.707802	0.916603	0.672789
ENSSSCG00000050950	lncRNA	0.00550568	0	0
ENSSSCG00000050949	lncRNA	0	0	0
ENSSSCG00000050948	lncRNA	0.0695671	0	0
ENSSSCG00000050947	pseudogene	0.335687	0.0266564	0.0649153
ENSSSCG00000050946	protein_coding	5.35097	3.18166	2.58769
ENSSSCG00000050945	protein_coding	0	0	0
ENSSSCG00000050944	lncRNA	0.814065	0.279934	0.0500787
ENSSSCG00000050943	protein_coding	0	0	0.00689821
ENSSSCG00000050942	protein_coding	0	0	0
ENSSSCG00000050941	protein_coding	0	0	0
ENSSSCG00000050940	TOMM6	0.952325	0.361825	0.362767
ENSSSCG00000050939	protein_coding	0	0	0
ENSSSCG00000050938	pseudogene	0	0.00712294	0
ENSSSCG00000050936	lncRNA	0.503023	0.246324	0.348619
ENSSSCG00000050935	lncRNA	0	0	0
ENSSSCG00000050934	lncRNA	0.0518291	0.0138901	0.0135799
ENSSSCG00000050933	pseudogene	1.14906	0.661055	0.449184
ENSSSCG00000050932	lncRNA	0	0	0
ENSSSCG00000050931	lncRNA	0	0	0
ENSSSCG00000050930	lncRNA	0.0667253	0	0.0269839
ENSSSCG00000050929	pseudogene	0.188128	0.0290056	0.143962
ENSSSCG00000050928	lncRNA	0	0	0
ENSSSCG00000050927	lncRNA	0	0	0
ENSSSCG00000050926	lncRNA	0.165586	0.0657841	0.10837
ENSSSCG00000050925	SNORA70	0.569559	0	0
ENSSSCG00000050924	lncRNA	0	0	0
ENSSSCG00000050923	lncRNA	0.039021	0.0127932	0.0341911
ENSSSCG00000050922	protein_coding	0.037543	0	0
ENSSSCG00000050921	protein_coding	0	0.0383033	0.0373087
ENSSSCG00000050920	lncRNA	1.21932	0.426495	0.156946
ENSSSCG00000050919	pseudogene	0.00990103	0	0
ENSSSCG00000050918	lncRNA	0.0222553	0.00848099	0.0123361
ENSSSCG00000050916	protein_coding	0	0	0
ENSSSCG00000050915	PMF1	0.016144	0.00812967	0.0624704
ENSSSCG00000050914	lncRNA	0.602195	0.111291	0.0366377
ENSSSCG00000050913	lncRNA	0.385404	0.215125	0.669102
ENSSSCG00000050912	lncRNA	0.236586	0	0
ENSSSCG00000050911	lncRNA	0.0104912	0.00871108	0.0172065
ENSSSCG00000050910	protein_coding	0	0	0
ENSSSCG00000050909	lncRNA	0.0977178	0	0
ENSSSCG00000050908	lncRNA	1.66013	1.2087	0.172327
ENSSSCG00000050907	lncRNA	0.0115802	0	0
ENSSSCG00000050906	pseudogene	0	0	0
ENSSSCG00000050905	protein_coding	0	0	0
ENSSSCG00000050904	lncRNA	0.357586	0.19194	0.348519
ENSSSCG00000050903	lncRNA	0.0291305	0	0.055886
ENSSSCG00000050902	protein_coding	0	0	0
ENSSSCG00000050901	protein_coding	0	0	0
ENSSSCG00000050900	pseudogene	0	0	0
ENSSSCG00000050899	protein_coding	0.0352231	0	0.00559043
ENSSSCG00000050898	lncRNA	0	0	0
ENSSSCG00000050897	lncRNA	0	0	0
ENSSSCG00000050896	U6	0	0	0
ENSSSCG00000050895	lncRNA	0.0815461	0.0299181	0.00971375
ENSSSCG00000050894	lncRNA	0.0716476	0.0340349	0.0414085
ENSSSCG00000050893	lncRNA	0	0	0
ENSSSCG00000050892	lncRNA	1.01681	0.752086	1.24725
ENSSSCG00000050891	lncRNA	0.0293053	0	0.0698641
ENSSSCG00000050890	lncRNA	0.00692153	0	0
ENSSSCG00000050889	pseudogene	0.0709339	0.0385	0.0941588
ENSSSCG00000050888	lncRNA	0.246873	0.318164	0.152728
ENSSSCG00000050887	lncRNA	0	0.0638491	0.0315294
ENSSSCG00000050886	lncRNA	0	0	0
ENSSSCG00000050885	lncRNA	0	0	0
ENSSSCG00000050884	lncRNA	0.226005	0.0976216	0.203087
ENSSSCG00000050883	lncRNA	0	0	0
ENSSSCG00000050882	lncRNA	0	0	0
ENSSSCG00000050881	lncRNA	0	0	0
ENSSSCG00000050880	lncRNA	0.254406	0.066166	0.118101
ENSSSCG00000050879	lncRNA	0.0591362	0	0.0272082
ENSSSCG00000050878	protein_coding	1.59151	0.961792	1.07759
ENSSSCG00000050877	lncRNA	0	0.0305157	0
ENSSSCG00000050876	pseudogene	0.0689408	0.00410767	0.0527641
ENSSSCG00000050873	lncRNA	0	0	0
ENSSSCG00000050872	lncRNA	0.0736452	0	0.0110982
ENSSSCG00000050871	processed_pseudogene	0.0164064	0	0
ENSSSCG00000050870	lncRNA	0	0.20076	0.648534
ENSSSCG00000050869	protein_coding	0	0	0
ENSSSCG00000050868	lncRNA	0	0	0
ENSSSCG00000050867	protein_coding	0.0824723	0.10339	0.110151
ENSSSCG00000050866	lncRNA	0.100517	0.00614638	0.023622
ENSSSCG00000050865	lncRNA	0.0155719	0	0.0448114
ENSSSCG00000050864	protein_coding	0	0.00741967	0.00711092
ENSSSCG00000050863	processed_pseudogene	0.0236996	0	0.0104775
ENSSSCG00000050862	protein_coding	0	0	0
ENSSSCG00000050860	protein_coding	0	0	0
ENSSSCG00000050859	lncRNA	0	0.0534604	0.0579993
ENSSSCG00000050858	lncRNA	0.433303	0.082694	0.280322
ENSSSCG00000050857	protein_coding	0.0752796	0	0
ENSSSCG00000050856	protein_coding	0.0366839	0	0
ENSSSCG00000050855	lncRNA	0.0315301	0	0.015217
ENSSSCG00000050854	lncRNA	0.215903	0.0165282	0.0825963
ENSSSCG00000050853	lncRNA	0.283368	0.0950908	0.444845
ENSSSCG00000050852	lncRNA	0.0373103	0	0
ENSSSCG00000050851	U2	0	0	0
ENSSSCG00000050850	pseudogene	0.0631495	0.0535338	0.116432
ENSSSCG00000050848	lncRNA	0.0692384	0	0.00552619
ENSSSCG00000050847	protein_coding	0	0	0.0171503
ENSSSCG00000050846	lncRNA	0.023915	0	0
ENSSSCG00000050845	protein_coding	0	0	0
ENSSSCG00000050844	pseudogene	0.122822	0.04062	0
ENSSSCG00000050843	lncRNA	0.0192263	0.00968184	0
ENSSSCG00000050842	protein_coding	0.0160584	0.00666685	0.0264867
ENSSSCG00000050841	lncRNA	0	0	0.017746
ENSSSCG00000050840	pseudogene	0	0	0
ENSSSCG00000050839	lncRNA	0	0	0
ENSSSCG00000050838	lncRNA	0	0	0
ENSSSCG00000050837	lncRNA	0	0	0
ENSSSCG00000050836	pseudogene	0	0	0
ENSSSCG00000050835	lncRNA	0.0616406	0.0299344	0.119597
ENSSSCG00000050834	lncRNA	0.315265	0.607848	0.793587
ENSSSCG00000050833	lncRNA	0.0825578	0	0
ENSSSCG00000050832	lncRNA	0	0.0228647	0
ENSSSCG00000050831	protein_coding	0.00924129	0	0.00886457
ENSSSCG00000050830	lncRNA	1.48491	0.967532	0.822142
ENSSSCG00000050829	lncRNA	0	0	0
ENSSSCG00000050828	lncRNA	0.189391	0.090118	0.0608301
ENSSSCG00000050827	lncRNA	0	0	0.0141159
ENSSSCG00000050826	lncRNA	0.0198868	0	0.038391
ENSSSCG00000050825	pseudogene	0	0	0
ENSSSCG00000050824	lncRNA	4.95916	5.78037	4.68079
ENSSSCG00000050823	protein_coding	0	0	0
ENSSSCG00000050822	protein_coding	0	0	0
ENSSSCG00000050821	lncRNA	0.160543	0.0223223	0.0532961
ENSSSCG00000050820	lncRNA	0	0	0
ENSSSCG00000050819	lncRNA	0.11597	0	0.00798512
ENSSSCG00000050818	lncRNA	0	0	0
ENSSSCG00000050817	lncRNA	0	0	0.0298264
ENSSSCG00000050816	protein_coding	0.34224	0.0743086	0.0414985
ENSSSCG00000050815	lncRNA	0.607997	0.265911	0.476124
ENSSSCG00000050814	protein_coding	0	0	0
ENSSSCG00000050813	lncRNA	0.0595105	0	0.106849
ENSSSCG00000050812	protein_coding	0.132926	0.0456128	0.0774042
ENSSSCG00000050811	lncRNA	0.0855675	0.0646705	0.126134
ENSSSCG00000050810	lncRNA	0	0	0.0105683
ENSSSCG00000050809	protein_coding	0	0	0
ENSSSCG00000050808	processed_pseudogene	0	0	0
ENSSSCG00000050807	protein_coding	0	0	0
ENSSSCG00000050806	protein_coding	0	0	0
ENSSSCG00000050805	lncRNA	0	0	0
ENSSSCG00000050804	lncRNA	0	0	0
ENSSSCG00000050803	pseudogene	0	0	0
ENSSSCG00000050802	protein_coding	0	0	0
ENSSSCG00000050801	pseudogene	0.00968902	0	0.0185881
ENSSSCG00000050800	protein_coding	0	0	0
ENSSSCG00000050799	lncRNA	0	0	0
ENSSSCG00000050798	U3	0.399971	0.388475	0
ENSSSCG00000050797	lncRNA	0.0128556	0	0
ENSSSCG00000050796	lncRNA	0	0	0.00398377
ENSSSCG00000050795	lncRNA	0	0	0
ENSSSCG00000050794	lncRNA	0.0263295	0.0255727	0.0254142
ENSSSCG00000050793	ssc-mir-10390	44.0196	36.6562	56.2374
ENSSSCG00000050792	protein_coding	0.0532124	0.0353444	0.0227041
ENSSSCG00000050791	protein_coding	0.0382605	0	0.0308336
ENSSSCG00000050790	pseudogene	0	0.00791052	0.00751129
ENSSSCG00000050788	lncRNA	0	0.0127298	0.0757189
ENSSSCG00000050787	pseudogene	0.148493	0.0540757	0.0530665
ENSSSCG00000050786	protein_coding	0.187641	0.155092	0.151072
ENSSSCG00000050785	lncRNA	0.011633	0	0
ENSSSCG00000050783	lncRNA	0.0318223	0	0.0151795
ENSSSCG00000050782	lncRNA	0.0169673	0	0
ENSSSCG00000050781	lncRNA	0.0231002	0	0.0110793
ENSSSCG00000050780	lncRNA	50.3755	25.4014	16.2439
ENSSSCG00000050779	pseudogene	0.0417773	0.00784887	0.0391103
ENSSSCG00000050778	processed_pseudogene	0	0	0
ENSSSCG00000050777	protein_coding	0.0427905	0	0.009518
ENSSSCG00000050776	pseudogene	0	0	0.02342
ENSSSCG00000050775	ssc-mir-6516	0	1.43407	0
ENSSSCG00000050774	protein_coding	0.00541488	0	0
ENSSSCG00000050773	lncRNA	0.230675	0.121019	0
ENSSSCG00000050772	lncRNA	11.1577	3.78722	3.5377
ENSSSCG00000050771	protein_coding	0.123072	0.0172356	0.0714303
ENSSSCG00000050770	lncRNA	0	0.0165751	0
ENSSSCG00000050769	lncRNA	0.167439	0.0896094	0.0371673
ENSSSCG00000050768	lncRNA	0.137616	0.0184296	0.0238316
ENSSSCG00000050767	lncRNA	0.0215274	0.0204599	0.014857
ENSSSCG00000050766	lncRNA	0.102657	0.0465347	0.0150781
ENSSSCG00000050764	protein_coding	0	0	0
ENSSSCG00000050763	lncRNA	0	0.0403132	0
ENSSSCG00000050762	pseudogene	0.217001	0.0554828	0.0807591
ENSSSCG00000050761	protein_coding	0	0	0
ENSSSCG00000050760	lncRNA	0	0.0227054	0
ENSSSCG00000050759	protein_coding	2.19756	0.721704	0.502295
ENSSSCG00000050758	lncRNA	0.0171925	0	0
ENSSSCG00000050757	lncRNA	1.30058	0.722764	0.798784
ENSSSCG00000050756	protein_coding	0	0	0.0071391
ENSSSCG00000050755	lncRNA	0	0.00686405	0
ENSSSCG00000050754	protein_coding	0.142134	0	0
ENSSSCG00000050752	lncRNA	0.0956805	0.157166	0.220029
ENSSSCG00000050751	protein_coding	0	0	0
ENSSSCG00000050750	lncRNA	2.28349	0.010976	0.0219261
ENSSSCG00000050749	lncRNA	0	0	0
ENSSSCG00000050748	lncRNA	0.0365427	0	0
ENSSSCG00000050747	lncRNA	0.0687732	0	0.0103348
ENSSSCG00000050746	processed_pseudogene	0.0356631	0	0.10119
ENSSSCG00000050745	lncRNA	0	0	0
ENSSSCG00000050744	protein_coding	0	0	0
ENSSSCG00000050743	lncRNA	0	0	0.0301668
ENSSSCG00000050742	lncRNA	1.12961	0.531858	0.779337
ENSSSCG00000050741	protein_coding	0	0	0
ENSSSCG00000050740	protein_coding	0	0	0
ENSSSCG00000050739	lncRNA	0.842798	0.376588	0.548969
ENSSSCG00000050738	lncRNA	0	0	0
ENSSSCG00000050737	lncRNA	0.0451744	0	0
ENSSSCG00000050736	pseudogene	0	0	0.0147284
ENSSSCG00000050735	lncRNA	0.342152	0.157354	0.107589
ENSSSCG00000050733	lncRNA	0	0	0
ENSSSCG00000050732	protein_coding	0	0	0
ENSSSCG00000050731	lncRNA	0	0.00510347	0
ENSSSCG00000050730	lncRNA	0.146355	0	0.232579
ENSSSCG00000050729	protein_coding	0	0	0
ENSSSCG00000050728	miRNA	0	0	0
ENSSSCG00000050727	lncRNA	0.86107	0.514981	0.638534
ENSSSCG00000050726	lncRNA	0.0107351	0	0
ENSSSCG00000050725	protein_coding	0	0.00722857	0
ENSSSCG00000050724	protein_coding	0	0	0
ENSSSCG00000050723	lncRNA	0	0	0
ENSSSCG00000050722	protein_coding	0	0	0
ENSSSCG00000050721	lncRNA	0	0	0
ENSSSCG00000050720	protein_coding	0	0	0
ENSSSCG00000050719	lncRNA	0.0389772	0	0.0152615
ENSSSCG00000050718	lncRNA	0.0268376	0	0.0286171
ENSSSCG00000050717	lncRNA	0	0.00648081	0
ENSSSCG00000050716	protein_coding	0	0	0
ENSSSCG00000050715	protein_coding	0.0592304	0.00666862	0
ENSSSCG00000050714	lncRNA	0	0	0.015079
ENSSSCG00000050713	protein_coding	0	0	0.0105661
ENSSSCG00000050712	protein_coding	0	0	0
ENSSSCG00000050711	lncRNA	0.118815	0.171415	0.0636875
ENSSSCG00000050709	protein_coding	0.036712	0.0286097	0.0111447
ENSSSCG00000050708	lncRNA	0.0521112	0.0359438	0.0401597
ENSSSCG00000050707	protein_coding	1.07619	0	0
ENSSSCG00000050706	protein_coding	0	0	0
ENSSSCG00000050705	lncRNA	0.0154906	0.0156489	0.0148591
ENSSSCG00000050704	lncRNA	0.264219	0.0347224	0.149054
ENSSSCG00000050703	protein_coding	0	0.0108741	0.0107395
ENSSSCG00000050702	lncRNA	0.475595	0.594988	0.249646
ENSSSCG00000050701	lncRNA	0.0141461	0	0
ENSSSCG00000050700	protein_coding	0	0	0
ENSSSCG00000050699	lncRNA	0	0	0
ENSSSCG00000050698	protein_coding	0	0	0
ENSSSCG00000050697	lncRNA	0	0	0
ENSSSCG00000050696	pseudogene	0.0320647	0.0154868	0.0156421
ENSSSCG00000050695	protein_coding	0.994458	0	0
ENSSSCG00000050694	lncRNA	0	0	0
ENSSSCG00000050693	lncRNA	0.0797393	0.0383525	0.036832
ENSSSCG00000050692	lncRNA	147.369	93.7026	58.4081
ENSSSCG00000050691	lncRNA	0.0107104	0	0.0050813
ENSSSCG00000050690	lncRNA	0	0	0
ENSSSCG00000050689	protein_coding	0	0	0
ENSSSCG00000050688	lncRNA	0	0	0.0210668
ENSSSCG00000050687	lncRNA	26.3893	12.8392	14.8969
ENSSSCG00000050686	lncRNA	0.0636489	0	0
ENSSSCG00000050685	lncRNA	0.0275393	0	0
ENSSSCG00000050684	pseudogene	0.144227	0.0755204	0.152247
ENSSSCG00000050683	pseudogene	4.46654	1.58017	0.903798
ENSSSCG00000050682	lncRNA	0.305756	0.178962	0.231832
ENSSSCG00000050681	lncRNA	0.0326533	0	0
ENSSSCG00000050680	lncRNA	0	0	0.0082884
ENSSSCG00000050679	lncRNA	0.0646667	0.0274258	0.0188455
ENSSSCG00000050678	C12orf54	0	0	0
ENSSSCG00000050677	pseudogene	0	0	0.0135971
ENSSSCG00000050676	lncRNA	0	0	0
ENSSSCG00000050675	lncRNA	0.0969984	0	0
ENSSSCG00000050674	lncRNA	0.0791612	0	0
ENSSSCG00000050673	lncRNA	0	0.0472972	0.0467118
ENSSSCG00000050672	lncRNA	0	0	0.0197131
ENSSSCG00000050671	protein_coding	0.0132761	0	0
ENSSSCG00000050670	protein_coding	0	0	0
ENSSSCG00000050669	protein_coding	0.0306573	0.00593363	0
ENSSSCG00000050668	lncRNA	0.138472	0.0542823	0.0256932
ENSSSCG00000050667	lncRNA	0.517639	0.173591	0.0606077
ENSSSCG00000050665	lncRNA	0.351966	0	0.0190929
ENSSSCG00000050664	lncRNA	1.39995	0.492862	0.516484
ENSSSCG00000050663	protein_coding	0.0113534	0	0.0106574
ENSSSCG00000050662	protein_coding	0.0184677	0.0172754	0.0111703
ENSSSCG00000050661	lncRNA	0	0	0.0149067
ENSSSCG00000050660	lncRNA	0.938574	3.73902	1.59067
ENSSSCG00000050659	lncRNA	0	0	0
ENSSSCG00000050658	protein_coding	0	0	0
ENSSSCG00000050657	lncRNA	0	0	0
ENSSSCG00000050656	pseudogene	0.159118	0.0800674	0.105351
ENSSSCG00000050655	lncRNA	0	0	0
ENSSSCG00000050653	lncRNA	0.0247912	0.0172614	0.0220232
ENSSSCG00000050652	protein_coding	0	0	0
ENSSSCG00000050651	lncRNA	0.0475517	0.0136475	0.0656622
ENSSSCG00000050650	lncRNA	0.0807748	0.0263714	0.0381173
ENSSSCG00000050649	lncRNA	7171.93	11254.2	19103.4
ENSSSCG00000050648	lncRNA	0.0898593	0.0613201	0.150348
ENSSSCG00000050647	lncRNA	0.227765	0	0
ENSSSCG00000050646	lncRNA	0.318404	0.224039	0.563074
ENSSSCG00000050645	lncRNA	0.0116636	0	0.0335645
ENSSSCG00000050644	protein_coding	0	0	0
ENSSSCG00000050643	lncRNA	0	0	0
ENSSSCG00000050642	protein_coding	0	0	0
ENSSSCG00000050641	lncRNA	0	0	0
ENSSSCG00000050640	lncRNA	0.143633	0.943454	7.14294
ENSSSCG00000050639	protein_coding	0	0	0
ENSSSCG00000050638	lncRNA	0	0.00850376	0.0242977
ENSSSCG00000050637	lncRNA	0.0260025	0	0
ENSSSCG00000050636	lncRNA	0	0.00729261	0
ENSSSCG00000050635	lncRNA	0.0595586	0.0281815	0.00667964
ENSSSCG00000050634	protein_coding	0	0.0121285	0
ENSSSCG00000050632	processed_pseudogene	0	0	0
ENSSSCG00000050631	protein_coding	0	0	0
ENSSSCG00000050630	protein_coding	0	0	0
ENSSSCG00000050629	lncRNA	0	0.0109777	0
ENSSSCG00000050628	lncRNA	0.046983	0	0.0150226
ENSSSCG00000050627	protein_coding	17.3925	14.7572	18.0199
ENSSSCG00000050626	lncRNA	0.108992	0.0183827	0.0712494
ENSSSCG00000050625	protein_coding	0.0498703	0.0203924	0.0268274
ENSSSCG00000050624	pseudogene	0.0667244	0.0336006	0.0163641
ENSSSCG00000050623	lncRNA	0	0	0
ENSSSCG00000050622	lncRNA	0	0	0.0127459
ENSSSCG00000050621	lncRNA	0	0.0250811	0.037156
ENSSSCG00000050620	protein_coding	0	0	0
ENSSSCG00000050619	IFNA1	0	0	0.108619
ENSSSCG00000050618	lncRNA	0.0149318	0.0150385	0.0287359
ENSSSCG00000050617	lncRNA	0	0	0
ENSSSCG00000050616	lncRNA	13.6551	12.8426	11.8596
ENSSSCG00000050615	CCDC78	7.83455	3.37591	3.86869
ENSSSCG00000050614	lncRNA	0	0.0120835	0
ENSSSCG00000050613	lncRNA	0.304964	0	0
ENSSSCG00000050612	lncRNA	0.302832	0.13037	0
ENSSSCG00000050610	lncRNA	0	0	0
ENSSSCG00000050609	lncRNA	0.110783	0	0.0951739
ENSSSCG00000050608	processed_pseudogene	0	0	0
ENSSSCG00000050607	lncRNA	0.0294437	0.0149175	0.0571276
ENSSSCG00000050606	lncRNA	0.0538961	0	0
ENSSSCG00000050605	lncRNA	0.269578	0.106181	0.187934
ENSSSCG00000050604	lncRNA	0.235022	0.0783064	0.151578
ENSSSCG00000050603	pseudogene	0.182468	0.0583015	0.0564141
ENSSSCG00000050602	lncRNA	0.0533276	0	0.0611719
ENSSSCG00000050601	pseudogene	0	0	0.440513
ENSSSCG00000050599	pseudogene	0	0	0
ENSSSCG00000050598	lncRNA	0.088775	0.0214425	0.0618584
ENSSSCG00000050597	protein_coding	0	0.0138574	0.0136859
ENSSSCG00000050596	protein_coding	0	0	0
ENSSSCG00000050595	lncRNA	1.10463	1.00612	0.355502
ENSSSCG00000050594	protein_coding	0	0	0
ENSSSCG00000050593	lncRNA	0.0428369	0.043143	0
ENSSSCG00000050592	pseudogene	0.0233681	0	0.011338
ENSSSCG00000050591	protein_coding	0.995774	1.01351	0.604142
ENSSSCG00000050590	protein_coding	1.02445	1.26255	2.38349
ENSSSCG00000050589	protein_coding	0	0	0
ENSSSCG00000050588	protein_coding	0.0118026	0	0.00967866
ENSSSCG00000050587	protein_coding	0	0	0
ENSSSCG00000050586	pseudogene	0	0	0.21275
ENSSSCG00000050585	protein_coding	0.195935	0.0760347	0.110168
ENSSSCG00000050584	lncRNA	0.105132	3.11332	0.944002
ENSSSCG00000050583	pseudogene	0	0	0.0208812
ENSSSCG00000050582	lncRNA	0.0707147	0	0.00567934
ENSSSCG00000050581	protein_coding	2.37932	2.69042	3.28201
ENSSSCG00000050580	processed_pseudogene	0	0	0
ENSSSCG00000050578	lncRNA	0	0	0
ENSSSCG00000050577	protein_coding	0.0186462	0	0
ENSSSCG00000050576	OR6K3	0	0	0
ENSSSCG00000050575	protein_coding	0	0	0
ENSSSCG00000050574	processed_pseudogene	0	0	0
ENSSSCG00000050572	lncRNA	0.0176259	0.00789006	0.0077924
ENSSSCG00000050571	lncRNA	0	0	0.00872415
ENSSSCG00000050570	lncRNA	0.0415255	0	0.0389798
ENSSSCG00000050569	protein_coding	0.0551926	0	0.0227193
ENSSSCG00000050568	lncRNA	0.0702178	0.0441453	0.0121258
ENSSSCG00000050567	lncRNA	0	0	0.145449
ENSSSCG00000050566	lncRNA	1.16975	0.612891	0.698302
ENSSSCG00000050565	lncRNA	0.0789943	0.0154089	0.0293299
ENSSSCG00000050564	lncRNA	0.00418312	0.00397588	0
ENSSSCG00000050563	lncRNA	0.103059	0.0315904	0.0764907
ENSSSCG00000050562	lncRNA	0.0206238	0	0
ENSSSCG00000050561	pseudogene	0.0690538	0.0594558	0.0569817
ENSSSCG00000050560	protein_coding	0	0	0
ENSSSCG00000050559	pseudogene	0.0487534	0	0.0268169
ENSSSCG00000050558	protein_coding	0	0	0
ENSSSCG00000050557	pseudogene	0.204229	0.0626973	0.100184
ENSSSCG00000050556	pseudogene	0.509714	0.255484	0.206837
ENSSSCG00000050555	U1	0	0	0
ENSSSCG00000050554	lncRNA	0	0	0
ENSSSCG00000050553	lncRNA	0	0.00585942	0
ENSSSCG00000050552	pseudogene	0.438164	0.12638	0.133824
ENSSSCG00000050551	lncRNA	0.0909008	0.09038	0.0656681
ENSSSCG00000050550	lncRNA	0.587842	0.243003	0.303405
ENSSSCG00000050549	protein_coding	0	0	0
ENSSSCG00000050548	lncRNA	0	0	0
ENSSSCG00000050547	protein_coding	0.0698792	0	0.0840401
ENSSSCG00000050546	lncRNA	0.692879	0.107462	0.329709
ENSSSCG00000050545	lncRNA	0.279698	0	0
ENSSSCG00000050544	lncRNA	0.0885506	0	0
ENSSSCG00000050543	lncRNA	0	0	0.00561156
ENSSSCG00000050542	lncRNA	0.194273	0.2	0.0969228
ENSSSCG00000050541	protein_coding	0.0388667	0.00938776	0.0180852
ENSSSCG00000050540	lncRNA	4.50665	1.6829	1.35725
ENSSSCG00000050539	pseudogene	0	0	0
ENSSSCG00000050538	lncRNA	0	0	0.00594155
ENSSSCG00000050537	lncRNA	0.0495367	0.015227	0.0148316
ENSSSCG00000050536	lncRNA	0	0	0
ENSSSCG00000050535	lncRNA	0.121066	0	0.00659135
ENSSSCG00000050534	lncRNA	0.917879	0.424894	0.488524
ENSSSCG00000050533	pseudogene	0.00811843	0.0207636	0.00680853
ENSSSCG00000050532	U2	0	0	0
ENSSSCG00000050531	lncRNA	0.491781	0.229471	0.0352383
ENSSSCG00000050530	SRRD	16.6639	7.9041	6.18611
ENSSSCG00000050529	lncRNA	0	0.010226	0.0711545
ENSSSCG00000050528	lncRNA	0.0293224	0	0.0281271
ENSSSCG00000050527	protein_coding	0.085505	0.200691	0.356897
ENSSSCG00000050526	protein_coding	0.00631379	0	0
ENSSSCG00000050525	lncRNA	0.0729182	0.0230893	0.00549772
ENSSSCG00000050524	lncRNA	0.0332686	0	0
ENSSSCG00000050523	lncRNA	0.0469128	0	0.0781834
ENSSSCG00000050522	protein_coding	1.71906	0.918936	1.36425
ENSSSCG00000050521	lncRNA	0.22918	0.0277482	0.0551525
ENSSSCG00000050520	lncRNA	0.27476	0.055723	0.0934212
ENSSSCG00000050519	protein_coding	0.216711	0.14999	0
ENSSSCG00000050518	LDLRAD2	0.0436243	0	0.210277
ENSSSCG00000050516	lncRNA	0.0110654	0	0
ENSSSCG00000050515	lncRNA	0.0781961	0	0
ENSSSCG00000050514	lncRNA	0.704412	1.51701	0.833282
ENSSSCG00000050513	lncRNA	0.0326562	0.0100868	0.00500157
ENSSSCG00000050512	lncRNA	0	0	0
ENSSSCG00000050511	processed_pseudogene	0.0161002	0	0
ENSSSCG00000050510	pseudogene	0	0	0
ENSSSCG00000050509	lncRNA	0.0146915	0	0
ENSSSCG00000050508	lncRNA	0.0602326	0.12738	0.217783
ENSSSCG00000050507	protein_coding	0	0	0
ENSSSCG00000050506	pseudogene	0.0398313	0	0.0307595
ENSSSCG00000050505	protein_coding	0	0	0
ENSSSCG00000050504	lncRNA	0	0	0
ENSSSCG00000050502	lncRNA	0.0121878	0.0278159	0.142231
ENSSSCG00000050501	protein_coding	0.0395362	0	0.00474057
ENSSSCG00000050500	lncRNA	0.152862	0.0164458	0.143201
ENSSSCG00000050499	lncRNA	0.0987359	0.134371	0.324176
ENSSSCG00000050498	PURA	24.7382	25.2546	27.5753
ENSSSCG00000050497	lncRNA	0	0	0
ENSSSCG00000050496	lncRNA	0.00503743	0.00867454	0.00413094
ENSSSCG00000050495	protein_coding	1.72416	1.6501	1.22565
ENSSSCG00000050494	lncRNA	0.00425349	0	0.00827828
ENSSSCG00000050493	lncRNA	0.318773	0.132339	0.177595
ENSSSCG00000050492	lncRNA	0.0610068	0	0
ENSSSCG00000050491	lncRNA	0.0821782	0	0.0266776
ENSSSCG00000050490	lncRNA	0	0	0
ENSSSCG00000050489	lncRNA	0	0	0
ENSSSCG00000050488	lncRNA	0.184042	0.152204	0
ENSSSCG00000050487	RILP	0	0	0
ENSSSCG00000050486	pseudogene	0.0323921	0	0.0304063
ENSSSCG00000050485	lncRNA	0.0410375	0.0236276	0.0336527
ENSSSCG00000050484	lncRNA	0.546814	0	0
ENSSSCG00000050483	lncRNA	0.79152	0.613253	0.328002
ENSSSCG00000050482	pseudogene	0.0262172	0	0.0251682
ENSSSCG00000050481	pseudogene	0.0161482	0	0
ENSSSCG00000050480	protein_coding	0	0	0
ENSSSCG00000050479	lncRNA	0.00588876	0	0
ENSSSCG00000050478	lncRNA	0.676128	0.582705	0.108391
ENSSSCG00000050477	protein_coding	0	0	0
ENSSSCG00000050476	lncRNA	0.0266919	0.0452852	0.0220256
ENSSSCG00000050475	protein_coding	0	0	0
ENSSSCG00000050474	lncRNA	2.11563	1.54025	0.69212
ENSSSCG00000050473	lncRNA	0	0	0
ENSSSCG00000050472	lncRNA	0	0	0
ENSSSCG00000050471	protein_coding	0.0279987	0	0.0130402
ENSSSCG00000050470	protein_coding	0	0	0
ENSSSCG00000050469	protein_coding	0.219704	0.0838875	0.201748
ENSSSCG00000050468	protein_coding	0.0368366	0.0345653	0.0238585
ENSSSCG00000050467	lncRNA	0	0	0
ENSSSCG00000050466	lncRNA	0.0873984	0.0263486	0.0501138
ENSSSCG00000050465	lncRNA	2.19961	0.434826	0.130065
ENSSSCG00000050464	lncRNA	0.0690282	0	0.0128882
ENSSSCG00000050463	lncRNA	0.249805	0.102949	0.130205
ENSSSCG00000050462	pseudogene	0.0674194	0.270014	0.19629
ENSSSCG00000050461	lncRNA	0.216789	0	0.0525918
ENSSSCG00000050460	pseudogene	0	0	0
ENSSSCG00000050458	lncRNA	0	0	0
ENSSSCG00000050457	protein_coding	0	0	0
ENSSSCG00000050456	lncRNA	0.309764	0.13425	0.166398
ENSSSCG00000050455	protein_coding	0	0	0
ENSSSCG00000050454	protein_coding	0.0381784	0	0.0121071
ENSSSCG00000050453	lncRNA	0.00560855	0	0.0376931
ENSSSCG00000050452	lncRNA	0.0136519	0	0
ENSSSCG00000050451	lncRNA	0.464056	0.354814	0.331644
ENSSSCG00000050450	lncRNA	0.0286428	0	0
ENSSSCG00000050449	protein_coding	0	0	0
ENSSSCG00000050448	protein_coding	0.00932114	0	0
ENSSSCG00000050447	lncRNA	0.0863631	0.0651659	0.0507375
ENSSSCG00000050446	lncRNA	0.346099	0	0
ENSSSCG00000050445	lncRNA	0.00658396	0.051106	0
ENSSSCG00000050444	lncRNA	0	0	0
ENSSSCG00000050443	lncRNA	0	0	0
ENSSSCG00000050442	protein_coding	0.0240493	0	0
ENSSSCG00000050441	lncRNA	0	0.284953	0.166684
ENSSSCG00000050440	lncRNA	0	0.909151	0.208033
ENSSSCG00000050438	protein_coding	0	0	0
ENSSSCG00000050437	lncRNA	0.0208523	0.0482284	0.0649136
ENSSSCG00000050436	protein_coding	0.153984	0.155523	0.290178
ENSSSCG00000050435	lncRNA	1.11385	0.768742	1.33833
ENSSSCG00000050434	lncRNA	0.0484456	0.0363796	0.0907879
ENSSSCG00000050433	lncRNA	30.737	10.562	10.9298
ENSSSCG00000050432	protein_coding	0	0.00938776	0
ENSSSCG00000050431	protein_coding	0.00539764	0.00543622	0
ENSSSCG00000050430	lncRNA	0	0	0.00534368
ENSSSCG00000050429	ssc-mir-9829	0	0	0
ENSSSCG00000050428	lncRNA	0.0536106	0	0
ENSSSCG00000050427	lncRNA	0.014806	0	0
ENSSSCG00000050426	lncRNA	0.026165	0	0.0376475
ENSSSCG00000050425	lncRNA	0.231462	0.0916884	0.240093
ENSSSCG00000050424	lncRNA	1.08818	0.0235914	0.00319872
ENSSSCG00000050423	lncRNA	0.0268154	0	0.0646779
ENSSSCG00000050422	lncRNA	0	0	0
ENSSSCG00000050421	pseudogene	0	0	0
ENSSSCG00000050420	protein_coding	0	0	0
ENSSSCG00000050419	lncRNA	0.665965	0.233025	0.679393
ENSSSCG00000050418	lncRNA	0	0.0386195	0
ENSSSCG00000050416	pseudogene	0.0692095	0.00868925	0.0331036
ENSSSCG00000050415	lncRNA	0	0	0
ENSSSCG00000050414	processed_pseudogene	0	0	0
ENSSSCG00000050413	snoRNA	0	0	0
ENSSSCG00000050412	protein_coding	0	0	0
ENSSSCG00000050411	lncRNA	0	0	0
ENSSSCG00000050409	lncRNA	0.0626312	0.00866306	0
ENSSSCG00000050408	PSORS1C2	1.80055	0.919007	0.590177
ENSSSCG00000050407	lncRNA	0	0	0
ENSSSCG00000050406	lncRNA	0.470696	0	0
ENSSSCG00000050405	lncRNA	0.0166072	0	0
ENSSSCG00000050403	protein_coding	0	0	0
ENSSSCG00000050402	pseudogene	0.0633473	0.0753985	0.0363001
ENSSSCG00000050401	pseudogene	0.00748789	0.00758742	0
ENSSSCG00000050400	ssc-mir-9787	0	0	0
ENSSSCG00000050399	lncRNA	0.0198757	0	0
ENSSSCG00000050398	protein_coding	146.032	78.9987	42.3161
ENSSSCG00000050397	lncRNA	0.140315	0.0706702	0.0881364
ENSSSCG00000050396	lncRNA	0.0820725	0.0330218	0.0451592
ENSSSCG00000050395	U6	0	0	0
ENSSSCG00000050394	lncRNA	0.225985	0.124164	0.262425
ENSSSCG00000050393	pseudogene	0.0323371	0.027625	0
ENSSSCG00000050392	protein_coding	0	0	0
ENSSSCG00000050391	lncRNA	0.0178017	0.530291	0.400818
ENSSSCG00000050390	TEX51	0	0	0
ENSSSCG00000050389	lncRNA	0	0	0
ENSSSCG00000050388	lncRNA	0.236364	0.854269	0.313267
ENSSSCG00000050387	protein_coding	0	0	0
ENSSSCG00000050386	protein_coding	0.00765571	0	0
ENSSSCG00000050385	lncRNA	0.307101	0.125838	0.106483
ENSSSCG00000050384	lncRNA	0	0	0.00964449
ENSSSCG00000050383	P3R3URF	0.268611	0.537473	1.64036
ENSSSCG00000050382	lncRNA	4.23765	0.0456959	0.024888
ENSSSCG00000050381	protein_coding	0.205175	0.00713755	0.0286765
ENSSSCG00000050380	lncRNA	2.35334	0	0
ENSSSCG00000050379	protein_coding	0.0425873	0.0115854	0.00550037
ENSSSCG00000050378	lncRNA	0.0428253	0.0200121	0.0266515
ENSSSCG00000050377	pseudogene	0.0731946	0.00916459	0.0873407
ENSSSCG00000050376	lncRNA	0.0223172	0	0
ENSSSCG00000050375	protein_coding	0	0	0.00640686
ENSSSCG00000050374	protein_coding	0	0	0
ENSSSCG00000050373	lncRNA	0.343716	0.0589515	0.0287171
ENSSSCG00000050372	lncRNA	0.393372	0.441237	0.808973
ENSSSCG00000050371	lncRNA	0.368186	0.0684324	0.0976714
ENSSSCG00000050370	lncRNA	0	0	0
ENSSSCG00000050369	lncRNA	0.0259105	0.0289714	0.0501419
ENSSSCG00000050368	protein_coding	0	0	0.0167466
ENSSSCG00000050367	lncRNA	0.0129684	0.0378888	0.0608669
ENSSSCG00000050366	lncRNA	0.0276307	0	0
ENSSSCG00000050365	lncRNA	0.0848945	0.128149	0.124837
ENSSSCG00000050364	lncRNA	0.175987	0.0477654	0.138564
ENSSSCG00000050363	processed_pseudogene	0	0.0169482	0
ENSSSCG00000050362	protein_coding	0.0698225	0	0.0487608
ENSSSCG00000050361	processed_pseudogene	0	0	0
ENSSSCG00000050360	protein_coding	0	0	0
ENSSSCG00000050359	lncRNA	2.92591	2.75682	1.58136
ENSSSCG00000050358	lncRNA	0	0	0.0105951
ENSSSCG00000050357	lncRNA	0.0150522	0	0
ENSSSCG00000050356	lncRNA	0	0	0
ENSSSCG00000050354	lncRNA	0.00740109	0.00733887	0.00694737
ENSSSCG00000050353	lncRNA	0.0566387	0.366745	0.662945
ENSSSCG00000050352	lncRNA	0.0914795	0.0827307	0
ENSSSCG00000050351	lncRNA	0.129354	0.032212	0.0212753
ENSSSCG00000050349	lncRNA	0.0368864	0.0275123	0.0465792
ENSSSCG00000050348	lncRNA	0	0.0262331	0.0249891
ENSSSCG00000050347	lncRNA	3.36799	2.35189	2.7095
ENSSSCG00000050346	lncRNA	0	0	0
ENSSSCG00000050345	protein_coding	1.41364	0	0.654095
ENSSSCG00000050344	lncRNA	0.923242	0.297303	0.262548
ENSSSCG00000050343	lncRNA	0.0163875	0	0.0157257
ENSSSCG00000050342	lncRNA	0.228958	0	0.0803858
ENSSSCG00000050341	protein_coding	0	0	0
ENSSSCG00000050340	lncRNA	0.470125	0.101809	0.108254
ENSSSCG00000050339	lncRNA	0.953302	0.30734	0.279462
ENSSSCG00000050338	protein_coding	0.0515254	0	0
ENSSSCG00000050337	lncRNA	0.381329	0.137068	0.157091
ENSSSCG00000050336	lncRNA	0	0	0.0294365
ENSSSCG00000050335	lncRNA	0	0	0
ENSSSCG00000050334	lncRNA	0.00692827	0.0209759	0.0334215
ENSSSCG00000050333	lncRNA	0.0064758	0	0
ENSSSCG00000050332	lncRNA	0	0.0135409	0
ENSSSCG00000050331	lncRNA	0	0	0.172816
ENSSSCG00000050330	processed_pseudogene	0	0	0
ENSSSCG00000050329	pseudogene	0.0341301	0	0.00785153
ENSSSCG00000050328	protein_coding	0.0528544	0	0
ENSSSCG00000050327	lncRNA	0	0	0
ENSSSCG00000050325	lncRNA	0.0230179	0	0
ENSSSCG00000050324	pseudogene	0.0454137	0	0
ENSSSCG00000050323	lncRNA	0.0507537	0.156114	0.260429
ENSSSCG00000050322	protein_coding	0	0	0.0696331
ENSSSCG00000050321	lncRNA	0	0	0
ENSSSCG00000050320	protein_coding	7.90707	7.31975	8.00125
ENSSSCG00000050319	lncRNA	0.033011	0.0484207	0.0715429
ENSSSCG00000050318	SMIM35	0.575298	0.129523	0.0625851
ENSSSCG00000050317	protein_coding	0	0.00979996	0
ENSSSCG00000050316	lncRNA	0	0.0213421	0.0421559
ENSSSCG00000050315	lncRNA	0.185244	0.0242967	0
ENSSSCG00000050314	pseudogene	0.0110209	0.0107041	0.0213831
ENSSSCG00000050313	lncRNA	0.0411999	0.0248385	0.031577
ENSSSCG00000050312	lncRNA	0	0	0
ENSSSCG00000050311	lncRNA	0.0270552	0.0418549	0.0303794
ENSSSCG00000050310	FOXL3	0	0	0.202197
ENSSSCG00000050309	lncRNA	0	0	0
ENSSSCG00000050308	protein_coding	0.00965216	0	0
ENSSSCG00000050307	U2	0.908669	0	0.401721
ENSSSCG00000050306	pseudogene	0.00714234	0	0.0140132
ENSSSCG00000050304	pseudogene	0	0	0
ENSSSCG00000050303	lncRNA	0.0231874	0.0801692	0.0223199
ENSSSCG00000050302	lncRNA	1.37744	0.696004	0.13048
ENSSSCG00000050301	U2	0	0	0
ENSSSCG00000050300	pseudogene	0.064321	0	0.00657545
ENSSSCG00000050299	lncRNA	0.0663719	0	0
ENSSSCG00000050298	processed_pseudogene	0	0	0
ENSSSCG00000050297	pseudogene	0.00586716	0	0
ENSSSCG00000050296	lncRNA	0.0499269	0.00558731	0.0111615
ENSSSCG00000050295	lncRNA	0.172508	0.0207778	0.0207534
ENSSSCG00000050294	lncRNA	0	0	0.0161184
ENSSSCG00000050293	pseudogene	1.48347	0.112955	0.0244197
ENSSSCG00000050292	lncRNA	0	0	0.0179277
ENSSSCG00000050291	protein_coding	0	0	0
ENSSSCG00000050290	lncRNA	0	0	0
ENSSSCG00000050289	lncRNA	0	0	0
ENSSSCG00000050287	processed_pseudogene	0	0	0
ENSSSCG00000050286	lncRNA	0.552091	0.155813	0.125005
ENSSSCG00000050284	lncRNA	0.0615514	0	0.0206654
ENSSSCG00000050283	pseudogene	0	0	0
ENSSSCG00000050282	lncRNA	0	0	0
ENSSSCG00000050281	lncRNA	0.0220699	0.0214999	0.0474235
ENSSSCG00000050280	protein_coding	0	0.050714	0.0125999
ENSSSCG00000050279	lncRNA	0	0.0117762	0.011148
ENSSSCG00000050278	lncRNA	0	0	0
ENSSSCG00000050277	lncRNA	0.053325	0.028092	0.0455574
ENSSSCG00000050276	lncRNA	0.00763894	0.00774047	0
ENSSSCG00000050275	pseudogene	0.0168868	0	0
ENSSSCG00000050274	processed_pseudogene	0	0	0
ENSSSCG00000050273	pseudogene	6.65338	2.55789	0.825091
ENSSSCG00000050272	lncRNA	0	0	0.0609212
ENSSSCG00000050271	protein_coding	0	0	0
ENSSSCG00000050270	lncRNA	0	0	0
ENSSSCG00000050269	lncRNA	0.0113614	0	0
ENSSSCG00000050268	protein_coding	0	0	0
ENSSSCG00000050267	lncRNA	0	0.0337906	0
ENSSSCG00000050266	lncRNA	0.0973423	0.0278302	0.101352
ENSSSCG00000050265	lncRNA	0.0184538	0	0
ENSSSCG00000050264	protein_coding	8.36194	5.7029	6.21954
ENSSSCG00000050263	SNORA70	0	0	0
ENSSSCG00000050262	lncRNA	0	0	0
ENSSSCG00000050261	pseudogene	0.0203195	0	0.0307458
ENSSSCG00000050260	lncRNA	0.0760565	0.0460156	0
ENSSSCG00000050259	lncRNA	1.74718	0.04492	0.0186401
ENSSSCG00000050258	pseudogene	0.00929866	0.0180585	0
ENSSSCG00000050257	lncRNA	0.0258791	0.021488	0
ENSSSCG00000050256	lncRNA	0	0	0.0524118
ENSSSCG00000050255	pseudogene	0.0730988	0.0118695	0.0515484
ENSSSCG00000050254	lncRNA	0	0.0385858	0
ENSSSCG00000050253	protein_coding	0	0	0.0120308
ENSSSCG00000050252	lncRNA	0.0193992	0	0.0190305
ENSSSCG00000050251	lncRNA	27.0594	19.3384	24.6516
ENSSSCG00000050250	protein_coding	0	0	0
ENSSSCG00000050249	lncRNA	0.0606989	0	0
ENSSSCG00000050248	protein_coding	0	0	0
ENSSSCG00000050247	lncRNA	0	0	0.0151324
ENSSSCG00000050246	lncRNA	0.0188968	0	0
ENSSSCG00000050245	protein_coding	0.50784	0.858689	2.28736
ENSSSCG00000050244	protein_coding	47.2076	37.9564	40.6513
ENSSSCG00000050243	lncRNA	0.0404462	0.0123084	0.0244642
ENSSSCG00000050242	lncRNA	0	0	0
ENSSSCG00000050241	lncRNA	0.00287424	0.0251432	0.0463794
ENSSSCG00000050240	pseudogene	0.0311556	0.0129346	0.0641624
ENSSSCG00000050239	lncRNA	0.117634	0.0317092	0.0157231
ENSSSCG00000050238	lncRNA	0	0	0
ENSSSCG00000050237	lncRNA	0	0.137048	0
ENSSSCG00000050236	lncRNA	20.8887	6.2643	4.08757
ENSSSCG00000050235	lncRNA	0	0.0283113	0.111665
ENSSSCG00000050234	lncRNA	0.331725	0.206139	0.207898
ENSSSCG00000050232	lncRNA	0.713062	0.181461	0.233555
ENSSSCG00000050230	lncRNA	0.396762	0.0731015	0.148747
ENSSSCG00000050229	lncRNA	0	0	0
ENSSSCG00000050228	protein_coding	0.225166	0.0366815	0.0179759
ENSSSCG00000050227	lncRNA	0.0123217	0	0
ENSSSCG00000050226	lncRNA	0.0137788	0	0.0565669
ENSSSCG00000050225	lncRNA	0.0116376	0	0.019363
ENSSSCG00000050224	lncRNA	0	0.00592389	0.00564296
ENSSSCG00000050223	protein_coding	0.0221309	0	0.0102141
ENSSSCG00000050222	lncRNA	0.0530446	0	0.0379394
ENSSSCG00000050221	lncRNA	0.624016	1.14025	1.13538
ENSSSCG00000050220	pseudogene	0	0.0115286	0.0341577
ENSSSCG00000050219	snoRNA	1.27134	0	0
ENSSSCG00000050218	SNORD115	0	0	0
ENSSSCG00000050217	lncRNA	1.52933	0.45108	0.455267
ENSSSCG00000050216	lncRNA	0	0.0118187	0
ENSSSCG00000050215	lncRNA	0	0.0119836	0
ENSSSCG00000050214	pseudogene	0.0799943	0	0.0257378
ENSSSCG00000050213	lncRNA	4.23147	1.49869	2.983
ENSSSCG00000050212	protein_coding	0	0	0
ENSSSCG00000050211	protein_coding	0	0	0
ENSSSCG00000050210	protein_coding	0.03791	0.115009	0
ENSSSCG00000050209	lncRNA	0	0	0
ENSSSCG00000050208	protein_coding	0.0109817	0	0.0261152
ENSSSCG00000050207	protein_coding	0	0	0
ENSSSCG00000050206	lncRNA	0.0143048	0.0214417	0.00686082
ENSSSCG00000050205	lncRNA	1.24535	1.25082	1.37615
ENSSSCG00000050204	lncRNA	0.25674	2.81219	0.483805
ENSSSCG00000050203	protein_coding	0.569092	0.0837889	0.274178
ENSSSCG00000050202	protein_coding	0	0	0
ENSSSCG00000050201	protein_coding	0	0	0
ENSSSCG00000050200	lncRNA	1.74303	0.167097	0.216152
ENSSSCG00000050199	lncRNA	0.184076	0.644087	0.265066
ENSSSCG00000050198	lncRNA	0.0632633	0.309373	0.629186
ENSSSCG00000050197	protein_coding	0	0.0405106	0.0388248
ENSSSCG00000050196	lncRNA	0.797281	0.635303	0.134027
ENSSSCG00000050195	lncRNA	0.0370807	0.0540849	0.00604064
ENSSSCG00000050194	pseudogene	0.383111	0.180453	0.105431
ENSSSCG00000050193	lncRNA	0.0973314	0.0703482	0.0740267
ENSSSCG00000050192	lncRNA	0.0228537	0	0
ENSSSCG00000050191	processed_pseudogene	0.102532	0.152887	0.0299237
ENSSSCG00000050190	protein_coding	0	0	0
ENSSSCG00000050189	lncRNA	0.153886	0.0818862	0.0684291
ENSSSCG00000050188	lncRNA	0	0	0.0181629
ENSSSCG00000050186	lncRNA	0.855447	0.296817	0.189746
ENSSSCG00000050185	lncRNA	0.0376976	0	0.0274392
ENSSSCG00000050184	lncRNA	3.46224	2.57858	4.99746
ENSSSCG00000050183	protein_coding	0	0	0
ENSSSCG00000050182	lncRNA	0	0	0
ENSSSCG00000050181	protein_coding	0	0	0
ENSSSCG00000050180	protein_coding	0	0	0.00530083
ENSSSCG00000050179	protein_coding	0.0295455	0	0
ENSSSCG00000050178	lncRNA	0.949836	0.203677	0.626866
ENSSSCG00000050176	lncRNA	15.1314	7.96843	7.11033
ENSSSCG00000050174	protein_coding	0.0195452	0.00621027	0.00591483
ENSSSCG00000050173	pseudogene	0.183053	0.251765	0.141772
ENSSSCG00000050172	protein_coding	4.24046	2.85863	1.83206
ENSSSCG00000050171	lncRNA	0.0201526	0	0
ENSSSCG00000050170	lncRNA	0.0104238	0	0.0299968
ENSSSCG00000050169	protein_coding	0	0	0
ENSSSCG00000050168	lncRNA	0.0603381	0.0728696	0.0138806
ENSSSCG00000050167	lncRNA	1.16414	0.690396	0.105509
ENSSSCG00000050166	lncRNA	0	0	0
ENSSSCG00000050165	lncRNA	0	0.00531258	0
ENSSSCG00000050164	protein_coding	0	0	0
ENSSSCG00000050163	lncRNA	0.00992955	0.0196447	0.153834
ENSSSCG00000050162	lncRNA	0.0127533	0.021637	0.0320866
ENSSSCG00000050161	protein_coding	0	0	0
ENSSSCG00000050160	lncRNA	0.176163	0.0695801	0.0963934
ENSSSCG00000050159	pseudogene	0	0	0
ENSSSCG00000050158	lncRNA	0.0738536	0.0748352	0.2898
ENSSSCG00000050157	lncRNA	0.0921931	0.0161549	0.00517029
ENSSSCG00000050156	lncRNA	0.0556798	0.016194	0.0319872
ENSSSCG00000050155	processed_pseudogene	0	0	0
ENSSSCG00000050154	protein_coding	0.0600858	0	0
ENSSSCG00000050153	protein_coding	0	0.00538802	0
ENSSSCG00000050152	lncRNA	0.023842	0	0
ENSSSCG00000050150	pseudogene	0	0	0.225388
ENSSSCG00000050149	lncRNA	0.232977	0.0989145	0.190066
ENSSSCG00000050148	lncRNA	0.169637	0.0129613	0
ENSSSCG00000050147	lncRNA	0	0	0.0962546
ENSSSCG00000050146	pseudogene	0.0448707	0	0.0286944
ENSSSCG00000050145	lncRNA	0.159599	0.0259116	0.108434
ENSSSCG00000050144	lncRNA	1.45097	0.645715	0.864345
ENSSSCG00000050143	lncRNA	0.112894	0.021901	0.0834363
ENSSSCG00000050142	ssc-mir-9849	0	0	0
ENSSSCG00000050141	lncRNA	0.141389	0.07729	0.209576
ENSSSCG00000050140	protein_coding	0.0208905	0	0
ENSSSCG00000050139	lncRNA	0	0.0514926	0
ENSSSCG00000050137	lncRNA	0.0324597	0.0105089	0.0208226
ENSSSCG00000050135	lncRNA	0.323557	0.109661	0.254622
ENSSSCG00000050134	lncRNA	0.147593	0.15916	0.120967
ENSSSCG00000050133	protein_coding	0.0428392	0	0.0080948
ENSSSCG00000050132	pseudogene	0	0	0
ENSSSCG00000050131	ASCL5	0.469828	2.38382	2.37377
ENSSSCG00000050130	lncRNA	0.0148447	0.0128594	0.0248991
ENSSSCG00000050129	protein_coding	0.251407	0.0667381	0.0775755
ENSSSCG00000050128	lncRNA	1.29836	0.978765	0.737639
ENSSSCG00000050127	lncRNA	0	0	0
ENSSSCG00000050126	lncRNA	0	0	0
ENSSSCG00000050125	VSIG10L2	0.0836193	0.031162	0
ENSSSCG00000050124	lncRNA	0.186228	0.190403	0.133969
ENSSSCG00000050123	lncRNA	0.070939	0	0.0542005
ENSSSCG00000050122	lncRNA	0.139268	0.294466	0.647285
ENSSSCG00000050121	protein_coding	6.95958	8.42873	7.41791
ENSSSCG00000050120	processed_pseudogene	0.0492553	0.0452307	0.0436464
ENSSSCG00000050119	lncRNA	0.413352	0.260182	0.281701
ENSSSCG00000050118	lncRNA	0	0.0539531	0.103517
ENSSSCG00000050117	lncRNA	0.0241339	0	0
ENSSSCG00000050116	lncRNA	0.0213798	0	0
ENSSSCG00000050115	lncRNA	0.0639623	0.110144	0
ENSSSCG00000050114	lncRNA	0.38461	0.180111	0.027389
ENSSSCG00000050113	lncRNA	0	0	0
ENSSSCG00000050112	processed_pseudogene	0.0160566	0	0.0157514
ENSSSCG00000050111	lncRNA	0.0506365	0.0128274	0.0369802
ENSSSCG00000050110	lncRNA	0.122796	0	0
ENSSSCG00000050109	lncRNA	3.80927	3.81643	2.25631
ENSSSCG00000050108	lncRNA	8.51068	0	0.0067791
ENSSSCG00000050107	lncRNA	0	0	0
ENSSSCG00000050106	protein_coding	0	0	0
ENSSSCG00000050105	lncRNA	0.126717	0	0.073425
ENSSSCG00000050104	lncRNA	0.0294437	0.0596701	0.0282434
ENSSSCG00000050103	lncRNA	0.190993	0.600173	1.19606
ENSSSCG00000050102	lncRNA	0.10743	0.134667	0.0185578
ENSSSCG00000050101	lncRNA	0	0	0
ENSSSCG00000050100	lncRNA	0.00593687	0.00601577	0.0172137
ENSSSCG00000050099	lncRNA	0.432744	0.156472	0.232627
ENSSSCG00000050098	protein_coding	0.079938	0.00943718	0.00919214
ENSSSCG00000050097	protein_coding	0.0269081	0.0174728	0.0376009
ENSSSCG00000050096	lncRNA	0.00931383	0.0046902	0
ENSSSCG00000050095	lncRNA	0.0778672	0.0328991	0.0433234
ENSSSCG00000050094	protein_coding	1.37314	0.534934	1.9895
ENSSSCG00000050093	protein_coding	26.3141	10.3082	8.20199
ENSSSCG00000050092	lncRNA	0.360524	1.00347	3.66419
ENSSSCG00000050091	lncRNA	0.105889	0.120326	0.0191421
ENSSSCG00000050090	lncRNA	0	0	0
ENSSSCG00000050089	protein_coding	0	0	0
ENSSSCG00000050088	OR10J5	0	0	0
ENSSSCG00000050087	pseudogene	0.194509	0.0559506	0.0705383
ENSSSCG00000050086	protein_coding	0	0	0
ENSSSCG00000050085	lncRNA	1.29297	0.16396	0.478343
ENSSSCG00000050084	OR2V1	0	0	0
ENSSSCG00000050083	pseudogene	0	0	0
ENSSSCG00000050082	pseudogene	0	0	0
ENSSSCG00000050081	lncRNA	0.0601565	0.12095	0.118493
ENSSSCG00000050080	lncRNA	0	0	0
ENSSSCG00000050079	protein_coding	0	0	0
ENSSSCG00000050078	lncRNA	0	0	0
ENSSSCG00000050077	lncRNA	0.0276554	0.012256	0.0242087
ENSSSCG00000050076	lncRNA	0.00813789	0	0.007639
ENSSSCG00000050075	lncRNA	0.0242909	0	0.0230485
ENSSSCG00000050074	lncRNA	0	0	0.0166715
ENSSSCG00000050073	lncRNA	1.49491	0.216732	0.44488
ENSSSCG00000050072	lncRNA	0.384622	0.506894	0.267001
ENSSSCG00000050071	protein_coding	0	0	0
ENSSSCG00000050070	protein_coding	0	0	0.00743632
ENSSSCG00000050069	protein_coding	1.21487	0.252843	0.384502
ENSSSCG00000050068	lncRNA	0	0	0
ENSSSCG00000050067	lncRNA	5.25225	4.33904	4.03711
ENSSSCG00000050066	pseudogene	0	0	0
ENSSSCG00000050065	lncRNA	0	0	0
ENSSSCG00000050064	lncRNA	0.779616	0.950578	0.57758
ENSSSCG00000050063	lncRNA	25.3906	11.846	10.7292
ENSSSCG00000050062	lncRNA	0.0347865	0	0.272922
ENSSSCG00000050061	lncRNA	0.975153	0.715821	1.78741
ENSSSCG00000050060	lncRNA	0.632329	1.5773	6.09074
ENSSSCG00000050059	lncRNA	0.0202258	0	0.019548
ENSSSCG00000050058	protein_coding	0.122686	0.0399045	0.0326971
ENSSSCG00000050057	lncRNA	0.126067	0.0231576	0.19672
ENSSSCG00000050056	CCDC201	0.157952	0.0661685	0
ENSSSCG00000050055	protein_coding	0.00659701	0.00668469	0.00647164
ENSSSCG00000050054	lncRNA	0.603839	3.16714	2.2513
ENSSSCG00000050053	protein_coding	0	0	0
ENSSSCG00000050052	lncRNA	0	0	0
ENSSSCG00000050051	lncRNA	0.0435104	0	0
ENSSSCG00000050050	protein_coding	0.0333283	0	0.0105033
ENSSSCG00000050049	lncRNA	1.15368	1.01057	0.526445
ENSSSCG00000050048	pseudogene	0.0593451	0.0115614	0
ENSSSCG00000050047	pseudogene	0.0416989	0.00561453	0.00554503
ENSSSCG00000050046	U2	0.790877	0	0.250803
ENSSSCG00000050045	lncRNA	0.0350024	0	0
ENSSSCG00000050044	lncRNA	0	0	0
ENSSSCG00000050043	lncRNA	0.0873754	0.0525155	0.0573941
ENSSSCG00000050042	pseudogene	0	0	0
ENSSSCG00000050041	pseudogene	0.0217522	0	0
ENSSSCG00000050040	protein_coding	0	0	0
ENSSSCG00000050039	lncRNA	0	0	0.0202529
ENSSSCG00000050038	lncRNA	0	0	0
ENSSSCG00000050037	lncRNA	0.158832	0.157241	0.018649
ENSSSCG00000050036	lncRNA	0.02816	0	0
ENSSSCG00000050035	lncRNA	0.137197	0.0191585	0.0124407
ENSSSCG00000050034	lncRNA	0.0270292	0	0
ENSSSCG00000050033	lncRNA	0.0732591	0.0212373	0.0214502
ENSSSCG00000050032	pseudogene	0.0258837	0	0
ENSSSCG00000050031	lncRNA	0.120628	0	0
ENSSSCG00000050030	lncRNA	0	0.0158889	0.0470767
ENSSSCG00000050029	protein_coding	0	0	0
ENSSSCG00000050028	protein_coding	0	0	0
ENSSSCG00000050027	lncRNA	0	0	0
ENSSSCG00000050026	protein_coding	0	0	0
ENSSSCG00000050025	lncRNA	0.0120317	0.0704245	0.0691813
ENSSSCG00000050024	lncRNA	0.686788	0.432313	0.684155
ENSSSCG00000050022	lncRNA	0.193687	0.0203461	0
ENSSSCG00000050021	processed_pseudogene	0.0280737	0	0
ENSSSCG00000050020	pseudogene	0	0	0
ENSSSCG00000050019	pseudogene	0.100155	0.0407666	0.0528036
ENSSSCG00000050018	lncRNA	0	0	0
ENSSSCG00000050017	lncRNA	1.34444	0.0533588	0.0688776
ENSSSCG00000050016	lncRNA	0.984713	0.231662	0.743178
ENSSSCG00000050015	lncRNA	1.25854	0.0906548	0.102905
ENSSSCG00000050014	MRPS16	0.963814	0.454691	0.522413
ENSSSCG00000050012	pseudogene	0.0211764	0	0.0614001
ENSSSCG00000050011	lncRNA	0.18757	0.122991	0
ENSSSCG00000050009	lncRNA	0.131244	0.200645	0.413609
ENSSSCG00000050008	lncRNA	0	0	0
ENSSSCG00000050007	lncRNA	0	0	0
ENSSSCG00000050006	lncRNA	2.36557	1.1696	0.335466
ENSSSCG00000050005	protein_coding	0.00631049	0	0
ENSSSCG00000050004	lncRNA	0.0429349	0.0198296	0
ENSSSCG00000050003	lncRNA	0.230401	0	0
ENSSSCG00000050002	lncRNA	0	0	0
ENSSSCG00000050001	pseudogene	0	0	0
ENSSSCG00000050000	lncRNA	0.0523059	0.0317634	0.133051
ENSSSCG00000049999	lncRNA	0.130873	0	0
ENSSSCG00000049998	lncRNA	0	0	0
ENSSSCG00000049997	protein_coding	0	0	0
ENSSSCG00000049996	lncRNA	0.164714	0.0135341	0.0649051
ENSSSCG00000049995	lncRNA	0.486333	0.54716	0.556431
ENSSSCG00000049994	lncRNA	0	0	0
ENSSSCG00000049993	lncRNA	0	0.0126414	0
ENSSSCG00000049992	lncRNA	2.58383	1.5389	2.17707
ENSSSCG00000049990	SPATA25	0.0608764	0.20966	0.200819
ENSSSCG00000049989	lncRNA	0.0959325	0.0454355	0.0356316
ENSSSCG00000049988	LY6L	0.784378	0.0439317	0
ENSSSCG00000049987	protein_coding	0	0	0.210783
ENSSSCG00000049986	processed_pseudogene	0.0338057	0	0
ENSSSCG00000049985	lncRNA	0	0.0246744	0.0240337
ENSSSCG00000049984	lncRNA	0.0467805	0.00876989	0.0169808
ENSSSCG00000049983	protein_coding	0.016257	0.00549103	0.0051981
ENSSSCG00000049982	pseudogene	0.186619	0.0214097	0.0621082
ENSSSCG00000049981	lncRNA	0	0	0.00548038
ENSSSCG00000049980	lncRNA	0.45235	0.281172	0.108225
ENSSSCG00000049979	protein_coding	0.0125564	0.024391	0.0120446
ENSSSCG00000049978	protein_coding	0	0	0
ENSSSCG00000049977	lncRNA	0	0	0
ENSSSCG00000049976	protein_coding	0.0279388	0	0.0263902
ENSSSCG00000049975	pseudogene	1.06952	0.62688	0.543642
ENSSSCG00000049974	lncRNA	0.021719	0	0.0421399
ENSSSCG00000049973	protein_coding	0.0755358	0.018045	0.233926
ENSSSCG00000049971	lncRNA	0.796718	0.449124	0.643002
ENSSSCG00000049970	protein_coding	0.111621	0.0628314	0.0426021
ENSSSCG00000049969	protein_coding	0.0199013	0.0089086	0.00879833
ENSSSCG00000049968	lncRNA	0.367762	0.168508	0.226403
ENSSSCG00000049967	pseudogene	0.123451	0.022495	0.0872794
ENSSSCG00000049966	lncRNA	0	0	0
ENSSSCG00000049965	processed_pseudogene	0.74327	0	0
ENSSSCG00000049964	lncRNA	0.05216	0	0
ENSSSCG00000049963	lncRNA	0.00987415	0.0191168	0
ENSSSCG00000049962	pseudogene	0.119946	0.0241658	0.204654
ENSSSCG00000049961	protein_coding	3.45273	2.09404	2.23663
ENSSSCG00000049960	U2	0	0	0
ENSSSCG00000049959	lncRNA	0.0226809	0.00299291	0.011333
ENSSSCG00000049958	lncRNA	0.914377	0.356709	0.884024
ENSSSCG00000049957	lncRNA	3.27089	2.70103	2.26774
ENSSSCG00000049956	pseudogene	0.00550448	0	0
ENSSSCG00000049955	lncRNA	0.0321575	0.0455813	0.0517729
ENSSSCG00000049954	protein_coding	0	0	0
ENSSSCG00000049953	lncRNA	0	0	0
ENSSSCG00000049952	protein_coding	2.27029	0.755645	0.699655
ENSSSCG00000049951	protein_coding	0.153487	0	0
ENSSSCG00000049950	lncRNA	0.410455	0.146927	0
ENSSSCG00000049949	lncRNA	0	0	0
ENSSSCG00000049948	lncRNA	0	0.18893	0
ENSSSCG00000049947	protein_coding	0	0	0
ENSSSCG00000049946	lncRNA	0.0992444	0.0383442	0.0738687
ENSSSCG00000049945	protein_coding	0	0	0
ENSSSCG00000049944	processed_pseudogene	0	0	0
ENSSSCG00000049943	protein_coding	0	0	0
ENSSSCG00000049942	pseudogene	0	0	0
ENSSSCG00000049941	protein_coding	0	0	0
ENSSSCG00000049940	lncRNA	0.0103526	0.0052133	0.00499636
ENSSSCG00000049939	lncRNA	0.168142	0	0
ENSSSCG00000049938	pseudogene	0.0213414	0	0
ENSSSCG00000049937	pseudogene	0.187125	0.151322	0.304247
ENSSSCG00000049936	lncRNA	0	0	0
ENSSSCG00000049935	TCF24	0.234247	0.0242797	0.0360438
ENSSSCG00000049934	lncRNA	0.0326867	0.0103858	0
ENSSSCG00000049933	lncRNA	0	0	0
ENSSSCG00000049932	protein_coding	0	0	0
ENSSSCG00000049931	pseudogene	0.0121087	0	0.0114893
ENSSSCG00000049930	lncRNA	0	0	0
ENSSSCG00000049929	protein_coding	0	0	0.00948509
ENSSSCG00000049928	lncRNA	0	0	0
ENSSSCG00000049927	lncRNA	0	0	0
ENSSSCG00000049926	protein_coding	0.0116274	0.00582723	0
ENSSSCG00000049925	protein_coding	0	0	0
ENSSSCG00000049923	protein_coding	0.0654386	0.00608273	0.0120525
ENSSSCG00000049922	lncRNA	0.288395	0	0
ENSSSCG00000049921	lncRNA	0	0	0
ENSSSCG00000049920	lncRNA	0.0136598	0	0
ENSSSCG00000049919	lncRNA	0	0	0
ENSSSCG00000049918	lncRNA	1.87078	0.541792	0.28784
ENSSSCG00000049917	lncRNA	0.0161031	0.00493425	0.0148406
ENSSSCG00000049916	pseudogene	0.0889919	0.0253784	0.0120488
ENSSSCG00000049915	lncRNA	0.127998	0.060308	0.144756
ENSSSCG00000049914	protein_coding	0.0827834	0	0
ENSSSCG00000049913	protein_coding	0.156353	0.111022	0.193881
ENSSSCG00000049912	pseudogene	0.192797	0.0340307	0.065851
ENSSSCG00000049911	protein_coding	0	0	0.0272227
ENSSSCG00000049910	protein_coding	0.0603893	0	0.069779
ENSSSCG00000049909	pseudogene	0.0363649	0.0270502	0.0349438
ENSSSCG00000049908	lncRNA	0.0209274	0.0948564	0.192119
ENSSSCG00000049907	protein_coding	1.55902	0.123954	0
ENSSSCG00000049906	lncRNA	0.308347	0.12297	0.152445
ENSSSCG00000049905	lncRNA	0.0583172	0	0.070034
ENSSSCG00000049904	pseudogene	0.498577	0.0805891	0.325949
ENSSSCG00000049903	protein_coding	0	0	0
ENSSSCG00000049902	protein_coding	0.0129965	0.012623	0
ENSSSCG00000049901	lncRNA	0.0493723	0.100057	0.142079
ENSSSCG00000049900	lncRNA	0	0	0
ENSSSCG00000049899	lncRNA	0	0	0
ENSSSCG00000049898	lncRNA	0.134657	0.249176	0.167629
ENSSSCG00000049897	lncRNA	0	0	0
ENSSSCG00000049896	pseudogene	0.0756186	0.073255	0.129208
ENSSSCG00000049895	protein_coding	0	0.0127121	0
ENSSSCG00000049894	lncRNA	1.25491	0.122452	0.13702
ENSSSCG00000049893	pseudogene	0	0	0
ENSSSCG00000049892	lncRNA	0	0	0
ENSSSCG00000049891	protein_coding	0.00475173	0	0
ENSSSCG00000049890	lncRNA	0.0350024	0.0176263	0
ENSSSCG00000049889	lncRNA	0	0	0
ENSSSCG00000049887	lncRNA	3.9526	1.44497	1.35446
ENSSSCG00000049886	protein_coding	0	0.145153	0.0702635
ENSSSCG00000049885	protein_coding	0.0237569	0.0475069	0.0908359
ENSSSCG00000049884	lncRNA	0	0	0
ENSSSCG00000049883	protein_coding	0	0	0.023436
ENSSSCG00000049882	lncRNA	0.148113	0.0790314	0.154264
ENSSSCG00000049881	lncRNA	0	0	0
ENSSSCG00000049880	lncRNA	0.0220914	0.00553569	0
ENSSSCG00000049879	lncRNA	0	0	0
ENSSSCG00000049878	protein_coding	0	0	0
ENSSSCG00000049877	lncRNA	0.00419979	0	0.0120858
ENSSSCG00000049875	lncRNA	0	0	0.0796919
ENSSSCG00000049874	lncRNA	0	0	0
ENSSSCG00000049873	lncRNA	0.418653	0.0121203	0.0231597
ENSSSCG00000049872	lncRNA	0	0.0345835	0
ENSSSCG00000049871	lncRNA	0.0693991	0	0
ENSSSCG00000049870	U4	0.252614	0	0
ENSSSCG00000049869	lncRNA	0.0230653	0.0304689	0.00737502
ENSSSCG00000049868	pseudogene	0	0.00762806	0
ENSSSCG00000049867	lncRNA	0	0	0
ENSSSCG00000049866	lncRNA	0.285665	0.14569	0.053012
ENSSSCG00000049865	lncRNA	1.50242	1.3818	1.217
ENSSSCG00000049864	processed_pseudogene	0	0	0
ENSSSCG00000049863	lncRNA	0.112233	0.0352431	0.0568832
ENSSSCG00000049862	lncRNA	0.178121	0.0531248	0.125054
ENSSSCG00000049861	protein_coding	0.0134747	0	0.0418118
ENSSSCG00000049859	lncRNA	0.0377491	0.074915	0
ENSSSCG00000049858	lncRNA	0.00849091	0	0
ENSSSCG00000049857	lncRNA	0	0	0
ENSSSCG00000049856	lncRNA	0.0575545	0.0291597	0
ENSSSCG00000049855	U6	0	0	0
ENSSSCG00000049854	lncRNA	2.19868	1.73384	0.665584
ENSSSCG00000049853	lncRNA	0	0	0
ENSSSCG00000049852	lncRNA	0	0	0
ENSSSCG00000049851	lncRNA	0.296694	0.037328	0
ENSSSCG00000049850	pseudogene	0	0.00767635	0
ENSSSCG00000049849	lncRNA	5.85902	4.82152	4.90105
ENSSSCG00000049848	lncRNA	0.187511	0.783338	0.286145
ENSSSCG00000049847	protein_coding	0.00664379	0	0
ENSSSCG00000049845	lncRNA	0.191252	0.0300776	0.0096241
ENSSSCG00000049844	pseudogene	0.105163	0	0.0583151
ENSSSCG00000049843	protein_coding	0	0	0
ENSSSCG00000049842	U2	0.161074	0.652861	0
ENSSSCG00000049841	lncRNA	0.00877433	0	0.00860758
ENSSSCG00000049840	protein_coding	0	0	0.00532372
ENSSSCG00000049839	lncRNA	0.0287617	0	0
ENSSSCG00000049838	protein_coding	0.63278	0.492702	0.519554
ENSSSCG00000049837	protein_coding	0	0	0
ENSSSCG00000049836	lncRNA	0.0185883	0	0.0799347
ENSSSCG00000049835	lncRNA	0.0119448	0	0
ENSSSCG00000049834	lncRNA	0	0	0.0144796
ENSSSCG00000049833	lncRNA	0.829226	0.0246861	0.00700661
ENSSSCG00000049832	lncRNA	0	0	0
ENSSSCG00000049831	protein_coding	3.11478	1.73072	0.892749
ENSSSCG00000049830	lncRNA	3.01755	0.487455	0.136004
ENSSSCG00000049829	lncRNA	0.0927656	0.0909914	0.176438
ENSSSCG00000049828	lncRNA	0	0	0
ENSSSCG00000049827	protein_coding	0	0	0
ENSSSCG00000049826	processed_pseudogene	0	0	0.0171935
ENSSSCG00000049825	lncRNA	0.107372	0	0.0148158
ENSSSCG00000049824	lncRNA	0.0184933	0.0183379	0.0260394
ENSSSCG00000049823	protein_coding	0	0	0
ENSSSCG00000049822	protein_coding	0	0	0
ENSSSCG00000049821	lncRNA	0	0	0
ENSSSCG00000049819	processed_pseudogene	0.040823	0.0351489	0.0168431
ENSSSCG00000049818	protein_coding	0	0	0
ENSSSCG00000049817	protein_coding	0	0	0
ENSSSCG00000049816	lncRNA	0	0	0
ENSSSCG00000049815	lncRNA	0.0213351	0	0
ENSSSCG00000049814	protein_coding	0	0.0330222	0
ENSSSCG00000049813	protein_coding	0.309252	0.0487594	0.137166
ENSSSCG00000049812	lncRNA	0	0	0
ENSSSCG00000049811	lncRNA	2.84933	1.16194	1.67824
ENSSSCG00000049810	protein_coding	0	0	0
ENSSSCG00000049809	protein_coding	0	0	0
ENSSSCG00000049808	lncRNA	0.0720405	0	0
ENSSSCG00000049807	lncRNA	0.00882565	0	0
ENSSSCG00000049806	lncRNA	0.0602314	0.0602668	0.0292784
ENSSSCG00000049805	lncRNA	1.14504	0.771613	0.516726
ENSSSCG00000049804	lncRNA	0.0435604	0.0126692	0.0255925
ENSSSCG00000049803	lncRNA	0.0405207	0.0204052	0.117048
ENSSSCG00000049801	lncRNA	1.16062	0.493112	0.502603
ENSSSCG00000049800	lncRNA	0.0152908	0	0
ENSSSCG00000049799	protein_coding	0	0	0
ENSSSCG00000049798	lncRNA	0.037709	0.00626124	0.0060007
ENSSSCG00000049797	pseudogene	13.4504	14.1	14.7675
ENSSSCG00000049796	lncRNA	0.259708	0.319724	0.274834
ENSSSCG00000049795	protein_coding	0	0	0
ENSSSCG00000049794	protein_coding	0.0261308	0	0
ENSSSCG00000049793	lncRNA	0.0985164	0	0
ENSSSCG00000049792	U2	0	0	0
ENSSSCG00000049791	protein_coding	0	0	0
ENSSSCG00000049790	lncRNA	0.00986079	0	0.0189768
ENSSSCG00000049789	lncRNA	0.357569	0.0311487	0.0448856
ENSSSCG00000049788	lncRNA	9.84529	35.1189	13.3493
ENSSSCG00000049786	pseudogene	0	0	0
ENSSSCG00000049785	lncRNA	0.245149	0.0970883	0.0669306
ENSSSCG00000049784	lncRNA	0.095483	0.0865657	0.139172
ENSSSCG00000049783	lncRNA	0	0	0
ENSSSCG00000049782	lncRNA	0	0	0
ENSSSCG00000049781	lncRNA	0.0389895	0.0197539	0.187425
ENSSSCG00000049780	protein_coding	0	0	0
ENSSSCG00000049779	protein_coding	0	0	0
ENSSSCG00000049778	lncRNA	0.157142	0.0198149	0
ENSSSCG00000049777	lncRNA	0.123059	0.0251825	0.0849511
ENSSSCG00000049776	lncRNA	188.558	79.5236	0
ENSSSCG00000049775	processed_pseudogene	0.146075	0.0120026	0
ENSSSCG00000049774	lncRNA	0	0	0
ENSSSCG00000049773	lncRNA	0.453368	0.049684	0
ENSSSCG00000049772	lncRNA	0.0962706	0.0675347	0.0439707
ENSSSCG00000049771	lncRNA	0	0	0.00667962
ENSSSCG00000049770	protein_coding	0	0	0.0155446
ENSSSCG00000049769	lncRNA	0	0.0121737	0
ENSSSCG00000049767	lncRNA	0.0688577	0	0
ENSSSCG00000049766	lncRNA	0	0.00849771	0
ENSSSCG00000049765	lncRNA	5.35914	11.0477	9.21187
ENSSSCG00000049764	lncRNA	5.2882	1.65178	0.849686
ENSSSCG00000049763	lncRNA	0	0	0
ENSSSCG00000049762	lncRNA	0.0830574	0.0928023	0.0456915
ENSSSCG00000049761	protein_coding	0.0109032	0	0
ENSSSCG00000049760	lncRNA	0	0	0
ENSSSCG00000049759	lncRNA	2.36431	0.735728	0.289958
ENSSSCG00000049758	lncRNA	0.435932	0	0.37543
ENSSSCG00000049757	lncRNA	0.0114583	0	0.00939635
ENSSSCG00000049756	protein_coding	0	0	0
ENSSSCG00000049755	protein_coding	0	0	0
ENSSSCG00000049754	lncRNA	0	0	0
ENSSSCG00000049753	RNaseP_nuc	0	0	0
ENSSSCG00000049752	lncRNA	0.177609	0.0273887	0.236874
ENSSSCG00000049751	lncRNA	0.283972	0	0.0857968
ENSSSCG00000049750	pseudogene	0.0233312	0.0155343	0.0220583
ENSSSCG00000049749	lncRNA	0.063871	0.0421209	0.0612673
ENSSSCG00000049748	lncRNA	0	0.0276705	0
ENSSSCG00000049747	lncRNA	0.0404105	0.00787261	0.0224943
ENSSSCG00000049746	protein_coding	0.0450887	0	0.00959166
ENSSSCG00000049745	lncRNA	0.585888	0.0371966	0.240682
ENSSSCG00000049743	protein_coding	0	0	0
ENSSSCG00000049742	pseudogene	0	0	0
ENSSSCG00000049741	lncRNA	0.114736	0	0
ENSSSCG00000049740	lncRNA	0.0629963	0.750267	0.0234444
ENSSSCG00000049739	protein_coding	0.0371801	0.0116236	0.00573984
ENSSSCG00000049738	pseudogene	0.138617	0	0
ENSSSCG00000049737	lncRNA	2.41647	0	0.019151
ENSSSCG00000049736	protein_coding	0	0	0
ENSSSCG00000049735	lncRNA	0.0675965	0	0
ENSSSCG00000049734	protein_coding	0	0	0
ENSSSCG00000049733	lncRNA	0.26604	0.011062	0.00538737
ENSSSCG00000049732	pseudogene	0.00934165	0.00920695	0.0175379
ENSSSCG00000049731	lncRNA	0.0216859	0	0.105173
ENSSSCG00000049730	snoRNA	0	0.663923	0
ENSSSCG00000049729	lncRNA	0.646238	4.47647	3.8209
ENSSSCG00000049727	lncRNA	0.0250613	0.00579354	0
ENSSSCG00000049726	lncRNA	0.0511458	0.280584	0.323251
ENSSSCG00000049725	protein_coding	1.68544	0.846847	0.768054
ENSSSCG00000049724	TR_V_gene	0.0602326	0.117003	0
ENSSSCG00000049723	lncRNA	0.943874	0.0345397	0
ENSSSCG00000049721	lncRNA	0.00855915	0.0337944	0.0485711
ENSSSCG00000049720	lncRNA	0.525395	0.344448	0.482303
ENSSSCG00000049719	lncRNA	0	0	0.114369
ENSSSCG00000049718	pseudogene	0.134687	0.0497259	0.0405485
ENSSSCG00000049717	lncRNA	0.0294546	0.0279954	0.110595
ENSSSCG00000049716	lncRNA	0.015303	0	0
ENSSSCG00000049715	lncRNA	0.74066	0.192097	0.976248
ENSSSCG00000049714	lncRNA	0.495759	0.139131	0.117606
ENSSSCG00000049712	protein_coding	0	0	0
ENSSSCG00000049711	protein_coding	0.900087	0.600835	0.536432
ENSSSCG00000049709	lncRNA	0	0	0
ENSSSCG00000049708	lncRNA	0.0866856	0	0
ENSSSCG00000049707	lncRNA	0	0	0
ENSSSCG00000049706	lncRNA	0.0854231	0.0579338	0.102563
[truncated: 28,479 more rows]

## Sheet: DEG
Supplementary Table S2 Expression level of mRNA during embryonic muscle development
ensembleid	geneId	d33_TPM	d65_TPM	d90_TPM	geneId
ENSSSCG00000000003	TTC38	13.2497	11.3277	18.5038	TTC38
ENSSSCG00000000005	CDPF1	20.9881	25.42	44.6598	CDPF1
ENSSSCG00000000006	PPARA	6.44371	8.67844	14.7237	PPARA
ENSSSCG00000000010	FBLN1	575.451	317.176	148.394	FBLN1
ENSSSCG00000000018	KIAA0930	36.0832	12.2191	14.7482	KIAA0930
ENSSSCG00000000024	PARVB	11.1769	5.33567	47.4126	PARVB
ENSSSCG00000000029	SCUBE1	77.8392	35.9151	16.5002	SCUBE1
ENSSSCG00000000033	TSPO	86.2129	133.767	71.5184	TSPO
ENSSSCG00000000038	CYB5R3	150.155	236.737	196.808	CYB5R3
ENSSSCG00000000040	SEPTIN3	23.9767	1.70081	0.932707	SEPTIN3
ENSSSCG00000000062	CSDC2	246.935	150.844	68.8312	CSDC2
ENSSSCG00000000064	ACO2	209.623	333.021	637.243	ACO2
ENSSSCG00000000067	CHADL	27.5845	2.52516	1.37618	CHADL
ENSSSCG00000000077	ADSL	52.7677	56.9692	87.1325	ADSL
ENSSSCG00000000079	FAM83F	1.16055	0.505381	0.327671	FAM83F
ENSSSCG00000000092	NPTXR	18.0632	7.87097	3.38899	NPTXR
ENSSSCG00000000106	KCNJ4	1.21466	0.251188	0.159561	KCNJ4
ENSSSCG00000000111	BAIAP2L2	5.84622	13.0003	18.9496	BAIAP2L2
ENSSSCG00000000113	SLC16A8	1.81899	8.17781	11.3142	SLC16A8
ENSSSCG00000000114	PICK1	40.7462	44.7025	57.7954	PICK1
ENSSSCG00000000130	CYTH4	5.53388	10.9598	9.53998	CYTH4
ENSSSCG00000000133	TST	13.7983	27.3378	58.399	TST
ENSSSCG00000000136	CSF2RB	4.10293	7.18061	9.64583	CSF2RB
ENSSSCG00000000146	MYH11	7.69841	9.18665	12.7336	MYH11
ENSSSCG00000000162	BTBD11	7.77627	1.95111	2.61791	BTBD11
ENSSSCG00000000186	RHEBL1	13.8904	7.54766	3.69611	RHEBL1
ENSSSCG00000000190	TUBA1B	1114.29	540.717	320.895	TUBA1B
ENSSSCG00000000195	PRPH	140.551	0.603429	0.567292	PRPH
ENSSSCG00000000197	C1QL4	7.17882	5.03075	2.26621	C1QL4
ENSSSCG00000000203	KCNH3	2.18351	0.467026	0.388403	KCNH3
ENSSSCG00000000206	FAIM2	17.0319	0.297067	0.891266	FAIM2
ENSSSCG00000000214	GPD1	17.7198	60.7287	108.304	GPD1
ENSSSCG00000000216	ASIC1	14.6408	0.785123	0.698773	ASIC1
ENSSSCG00000000228	SCN8A	5.2252	0.763885	0.678243	SCN8A
ENSSSCG00000000233	ACVR1B	17.3631	6.71249	5.50841	ACVR1B
ENSSSCG00000000234	TAMALIN	16.6043	27.6733	19.5467	TAMALIN
ENSSSCG00000000252	KRT8	42.0612	4.0425	3.75305	KRT8
ENSSSCG00000000261	protein_coding	206.507	409.709	313.19	protein_coding
ENSSSCG00000000265	ESPL1	22.8596	8.63693	6.9132	ESPL1
ENSSSCG00000000292	ZNF385A	31.1962	51.6717	60.6166	ZNF385A
ENSSSCG00000000298	PPP1R1A	38.5119	76.7668	122.45	PPP1R1A
ENSSSCG00000000363	GDF11	18.3556	7.89033	4.70265	GDF11
ENSSSCG00000000367	protein_coding	39.5438	57.0219	49.47	protein_coding
ENSSSCG00000000368	MMP19	9.59337	29.4341	37.904	MMP19
ENSSSCG00000000371	PMEL	79.2391	2.87767	0.71122	PMEL
ENSSSCG00000000384	NABP2	51.5466	76.3673	80.608	NABP2
ENSSSCG00000000398	APOF	8.73867	3.16865	2.6356	APOF
ENSSSCG00000000399	TIMELESS	21.0877	7.2065	6.3575	TIMELESS
ENSSSCG00000000401	GLS2	2.33574	0.613632	0.810158	GLS2
ENSSSCG00000000405	protein_coding	693.497	596.572	1004.16	protein_coding
ENSSSCG00000000418	TAC3	1.21748	0.22441	0.0948937	TAC3
ENSSSCG00000000419	RDH16	0.712292	0.172246	0.994315	RDH16
ENSSSCG00000000437	ARHGAP9	6.27614	3.69407	1.63391	ARHGAP9
ENSSSCG00000000439	KIF5A	21.2387	0.148947	0.160123	KIF5A
ENSSSCG00000000443	GLI1	14.0909	4.00398	4.30317	GLI1
ENSSSCG00000000455	LRIG3	54.2339	13.8247	12.3762	LRIG3
ENSSSCG00000000464	C12orf56	3.50841	1.09313	0.503209	C12orf56
ENSSSCG00000000478	GRIP1	8.63503	2.04018	0.823513	GRIP1
ENSSSCG00000000487	SLC35E3	14.375	5.32304	4.06822	SLC35E3
ENSSSCG00000000493	FRS2	13.6247	5.47803	3.45566	FRS2
ENSSSCG00000000499	BEST3	0.773479	3.27119	4.87208	BEST3
ENSSSCG00000000504	PTPRB	9.98183	11.9931	17.2214	PTPRB
ENSSSCG00000000515	TRHDE	6.14929	0.939728	0.361766	TRHDE
ENSSSCG00000000516	KCNC2	5.49248	1.03534	0.20447	KCNC2
ENSSSCG00000000521	PHLDA1	123.321	46.4494	31.0457	PHLDA1
ENSSSCG00000000528	PKP2	5.47276	0.703207	0.577653	PKP2
ENSSSCG00000000531	BICD1	6.52387	1.79243	1.46627	BICD1
ENSSSCG00000000541	FAR2	5.49979	5.89578	1.79935	FAR2
ENSSSCG00000000559	RASSF8	45.7309	11.4508	8.18666	RASSF8
ENSSSCG00000000563	IRAG2	0.587027	0.709431	0.898346	IRAG2
ENSSSCG00000000567	SOX5	8.81358	1.36848	0.848575	SOX5
ENSSSCG00000000571	ABCC9	2.37054	4.92267	5.76114	ABCC9
ENSSSCG00000000573	KCNJ8	6.1375	10.8786	17.318	KCNJ8
ENSSSCG00000000588	PLEKHA5	16.6666	8.35482	4.33693	PLEKHA5
ENSSSCG00000000607	ART4	0.0208677	0.570856	2.72565	ART4
ENSSSCG00000000614	GRIN2B	1.63684	0.359766	0.506669	GRIN2B
ENSSSCG00000000623	BCL2L14	1.61313	0.477844	0.118625	BCL2L14
ENSSSCG00000000633	YBX3	210.215	1684.13	1886.29	YBX3
ENSSSCG00000000649	CLEC1A	3.3941	3.33203	5.02236	CLEC1A
ENSSSCG00000000656	CLEC2B	3.7872	4.31911	7.71844	CLEC2B
ENSSSCG00000000657	protein_coding	2.13487	8.59206	27.1009	protein_coding
ENSSSCG00000000660	A2M	3.0616	0.284726	0.304565	A2M
ENSSSCG00000000665	RIMKLB	29.8765	5.8676	4.88513	RIMKLB
ENSSSCG00000000680	GPR162	23.7298	3.44793	1.64215	GPR162
ENSSSCG00000000685	TPI1	376.762	366.849	515.841	TPI1
ENSSSCG00000000687	CD4	0.591124	1.46098	3.19682	CD4
ENSSSCG00000000688	LAG3	8.68731	2.62462	0.663119	LAG3
ENSSSCG00000000691	COPS7A	24.4538	32.2385	33.5156	COPS7A
ENSSSCG00000000695	IFFO1	16.9737	21.4887	24.2713	IFFO1
ENSSSCG00000000703	protein_coding	3.00013	0.304894	0.235507	protein_coding
ENSSSCG00000000706	LTBR	35.5044	63.0135	60.8477	LTBR
ENSSSCG00000000707	SCNN1A	1.65365	4.42094	3.93133	SCNN1A
ENSSSCG00000000712	VWF	15.2743	21.8889	28.6514	VWF
ENSSSCG00000000719	NDUFA9	44.0249	47.9162	71.9618	NDUFA9
ENSSSCG00000000730	PRMT8	2.50183	3.02046	3.51263	PRMT8
ENSSSCG00000000734	TSPAN11	58.7787	54.3457	93.4526	TSPAN11
ENSSSCG00000000736	TEAD4	19.7047	37.4741	22.9073	TEAD4
ENSSSCG00000000741	NRIP2	4.98946	9.83704	15.7165	NRIP2
ENSSSCG00000000749	SLC6A12	1.34621	3.01882	13.5609	SLC6A12
ENSSSCG00000000760	LRTM2	2.22474	0.807127	0.590401	LRTM2
ENSSSCG00000000766	CECR2	25.0706	30.2398	35.4149	CECR2
ENSSSCG00000000779	KIF21A	11.9094	2.61481	3.09255	KIF21A
ENSSSCG00000000783	SLC2A13	7.535	2.60674	1.32156	SLC2A13
ENSSSCG00000000789	CNTN1	16.4795	1.36311	0.822206	CNTN1
ENSSSCG00000000791	PDZRN4	7.91182	3.51333	2.23663	PDZRN4
ENSSSCG00000000795	ADAMTS20	9.70768	10.3095	14.0779	ADAMTS20
ENSSSCG00000000807	pseudogene	17.7571	8.40825	5.52476	pseudogene
ENSSSCG00000000810	AMIGO2	6.98806	7.4156	10.2107	AMIGO2
ENSSSCG00000000837	CHST11	11.7413	1.58161	1.37417	CHST11
ENSSSCG00000000854	protein_coding	2.84417	0.668321	1.04391	protein_coding
ENSSSCG00000000859	PARPBP	1.33497	0.376947	0.356232	PARPBP
ENSSSCG00000000866	MYBPC1	150.416	1037.98	1013.74	MYBPC1
ENSSSCG00000000884	APAF1	41.9399	14.1614	9.81906	APAF1
ENSSSCG00000000896	NTN4	11.2947	23.6579	21.9712	NTN4
ENSSSCG00000000901	FGD6	5.37613	1.39881	1.51122	FGD6
ENSSSCG00000000905	protein_coding	54.2043	57.0888	83.8309	protein_coding
ENSSSCG00000000907	PLXNC1	7.90644	2.60267	1.69089	PLXNC1
ENSSSCG00000000910	CRADD	4.08236	6.64393	9.99575	CRADD
ENSSSCG00000000917	KERA	69.2146	245.361	120.39	KERA
ENSSSCG00000000927	TMTC3	10.5732	4.85303	2.81255	TMTC3
ENSSSCG00000000934	LRRIQ1	1.39936	0.446967	0.330237	LRRIQ1
ENSSSCG00000000936	SLC6A15	5.78835	1.54865	0.650218	SLC6A15
ENSSSCG00000000940	PPFIA2	5.99283	0.110329	0.350449	PPFIA2
ENSSSCG00000000948	SYT1	20.0872	1.43152	0.722319	SYT1
ENSSSCG00000000975	PANX2	14.7703	1.0504	0.854965	PANX2
ENSSSCG00000000997	PPP1R3G	6.29543	53.3826	61.3507	PPP1R3G
ENSSSCG00000001025	DSP	21.0544	2.02446	3.23189	DSP
ENSSSCG00000001036	TFAP2A	8.33395	0.795386	0.859727	TFAP2A
ENSSSCG00000001045	ELOVL2	4.38995	0.812491	0.734195	ELOVL2
ENSSSCG00000001062	DTNBP1	40.5588	61.5907	68.7618	DTNBP1
ENSSSCG00000001064	protein_coding	18.3343	38.0435	57.6746	protein_coding
ENSSSCG00000001068	CAP2	93.5149	153.509	133.159	CAP2
ENSSSCG00000001072	NHLRC1	3.93482	8.33731	6.89335	NHLRC1
ENSSSCG00000001074	KDM1B	12.5486	6.73046	3.72288	KDM1B
ENSSSCG00000001090	ALDH5A1	17.0749	5.62925	7.48721	ALDH5A1
ENSSSCG00000001100	CARMIL1	9.21458	1.25704	1.09217	CARMIL1
ENSSSCG00000001207	PGBD1	1.6818	0.590233	0.492707	PGBD1
ENSSSCG00000001216	ZBED9	5.89999	1.90856	1.22597	ZBED9
ENSSSCG00000001229	protein_coding	12.9493	18.2737	51.3557	protein_coding
ENSSSCG00000001341	protein_coding	75.9742	83.0478	155.449	protein_coding
ENSSSCG00000001398	protein_coding	5.19209	4.46679	8.57583	protein_coding
ENSSSCG00000001401	ATP6V1G2-DDX39B	15.1874	3.34605	1.49708	ATP6V1G2-DDX39B
ENSSSCG00000001402	NFKBIL1	39.8898	49.4191	55.4713	NFKBIL1
ENSSSCG00000001411	APOM	0.983823	0.962036	1.67706	APOM
ENSSSCG00000001427	C4A	7.89295	26.0006	40.0933	C4A
ENSSSCG00000001434	EGFL8	73.569	24.944	28.7599	EGFL8
ENSSSCG00000001439	GPSM3	2.19067	2.9614	4.62435	GPSM3
ENSSSCG00000001440	NOTCH4	25.0311	32.4125	63.465	NOTCH4
ENSSSCG00000001453	SLA-DRA	0.936562	13.3328	36.0389	SLA-DRA
ENSSSCG00000001455	SLA-DRB1	1.54279	11.0167	23.682	SLA-DRB1
ENSSSCG00000001456	protein_coding	11.706	34.0892	64.2527	protein_coding
ENSSSCG00000001457	SLA-DQB1	3.57763	16.5195	36.9466	SLA-DQB1
ENSSSCG00000001463	PSMB9	3.42934	4.50565	8.67846	PSMB9
ENSSSCG00000001469	SLA-DMB	3.38937	5.54668	9.19395	SLA-DMB
ENSSSCG00000001470	SLA-DMA	1.45137	9.9198	18.2073	SLA-DMA
ENSSSCG00000001472	SLA-DOA	0.175878	0.741503	2.01368	SLA-DOA
ENSSSCG00000001473	COL11A2	730.059	108.84	88.9236	COL11A2
ENSSSCG00000001476	HSD17B8	46.1236	51.1101	70.5209	HSD17B8
ENSSSCG00000001479	HMGCLL1	6.19252	0.81184	0.860414	HMGCLL1
ENSSSCG00000001485	MLIP	1.56589	18.3628	34.3822	MLIP
ENSSSCG00000001486	LRRC1	14.2281	5.26338	4.06584	LRRC1
ENSSSCG00000001487	KLHL31	33.5939	56.3776	78.6878	KLHL31
ENSSSCG00000001488	GCLC	14.1277	4.78625	4.70517	GCLC
ENSSSCG00000001493	PRIM2	20.0585	9.39133	6.2344	PRIM2
ENSSSCG00000001500	COL21A1	101.813	167.841	104.419	COL21A1
ENSSSCG00000001507	ZBTB22	30.7895	31.3155	42.0545	ZBTB22
ENSSSCG00000001510	KIFC1	2.7291	0.735656	0.897756	KIFC1
ENSSSCG00000001513	SYNGAP1	17.111	5.35034	5.81371	SYNGAP1
ENSSSCG00000001517	protein_coding	6.77312	15.0815	32.213	protein_coding
ENSSSCG00000001523	GRM4	1.90712	0.566045	0.706676	GRM4
ENSSSCG00000001536	SCUBE3	34.168	4.00029	3.96133	SCUBE3
ENSSSCG00000001549	FKBP5	23.8511	8.35722	4.8601	FKBP5
ENSSSCG00000001561	ETV7	5.49382	1.24946	0.995926	ETV7
ENSSSCG00000001565	CDKN1A	344.274	657.399	384.842	CDKN1A
ENSSSCG00000001567	CPNE5	16.2023	3.58126	1.87989	CPNE5
ENSSSCG00000001570	PI16	4.34352	33.0662	64.9415	PI16
ENSSSCG00000001572	FGD2	4.28976	8.29126	10.6106	FGD2
ENSSSCG00000001597	LRFN2	5.07934	1.70748	1.06815	LRFN2
ENSSSCG00000001619	FOXP4	110.268	35.551	33.65	FOXP4
ENSSSCG00000001620	MDFI	246.818	99.616	44.9832	MDFI
ENSSSCG00000001621	TFEB	12.3407	59.9232	117.065	TFEB
ENSSSCG00000001629	USP49	7.24104	1.85707	1.28905	USP49
ENSSSCG00000001660	PTK7	301.451	127.897	74.9793	PTK7
ENSSSCG00000001661	SRF	81.4683	101.391	139.32	SRF
ENSSSCG00000001682	DLK2	22.7154	24.4436	5.46688	DLK2
ENSSSCG00000001695	VEGFA	53.5734	60.5108	143.781	VEGFA
ENSSSCG00000001696	protein_coding	33.6665	50.2131	53.714	protein_coding
ENSSSCG00000001700	SLC29A1	43.2933	56.4655	75.2269	SLC29A1
ENSSSCG00000001705	TCTE1	5.97297	1.28059	1.74022	TCTE1
ENSSSCG00000001710	RUNX2	19.5116	0.288182	0.297154	RUNX2
ENSSSCG00000001716	RCAN2	11.1512	11.7156	18.5451	RCAN2
ENSSSCG00000001723	PLA2G7	4.64268	12.241	18.1287	PLA2G7
ENSSSCG00000001725	ADGRF5	33.7353	43.7642	73.245	ADGRF5
ENSSSCG00000001727	TNFRSF21	79.1215	94.1229	136.837	TNFRSF21
ENSSSCG00000001750	PAQR8	10.2178	4.25588	2.51867	PAQR8
ENSSSCG00000001760	ACSBG1	1.83056	0.430965	0.927406	ACSBG1
ENSSSCG00000001762	CIB2	185.677	82.194	35.8195	CIB2
ENSSSCG00000001782	ABHD17C	20.7305	9.04144	5.57178	ABHD17C
ENSSSCG00000001788	STARD5	24.041	10.9127	7.74913	STARD5
ENSSSCG00000001793	ADAMTSL3	42.4038	81.2216	55.6037	ADAMTSL3
ENSSSCG00000001795	SH3GL3	3.51674	1.99997	0.738501	SH3GL3
ENSSSCG00000001798	BNC1	6.64144	0.167941	0.429396	BNC1
ENSSSCG00000001800	TM6SF1	32.9438	81.8271	67.7313	TM6SF1
ENSSSCG00000001801	BTBD1	102.084	180.798	170.678	BTBD1
ENSSSCG00000001804	HOMER2	17.241	20.3241	31.2009	HOMER2
ENSSSCG00000001806	FSD2	8.28531	59.5362	53.7345	FSD2
ENSSSCG00000001807	AP3B2	11.1796	0.718388	0.748398	AP3B2
ENSSSCG00000001816	BLM	10.485	3.77908	2.73841	BLM
ENSSSCG00000001832	ACAN	235.043	7.26308	1.55541	ACAN
ENSSSCG00000001841	RHCG	0.873802	7.52126	10.1757	RHCG
ENSSSCG00000001849	ANPEP	11.8051	2.77485	4.02823	ANPEP
ENSSSCG00000001852	IDH2	172.532	161.136	305.866	IDH2
ENSSSCG00000001867	PSTPIP1	0.692446	2.5282	3.34321	PSTPIP1
ENSSSCG00000001872	LINGO1	51.2717	58.1733	84.7059	LINGO1
ENSSSCG00000001909	STRA6	31.9977	1.80815	0.298957	STRA6
ENSSSCG00000001916	INSYN1	14.8793	6.17178	4.67337	INSYN1
ENSSSCG00000001920	HCN4	3.58911	0.760137	0.250066	HCN4
ENSSSCG00000001934	SEC23A	80.3327	44.5477	26.4179	SEC23A
ENSSSCG00000001938	SSTR1	16.1113	0.503579	0.238961	SSTR1
ENSSSCG00000001942	PAX9	6.98337	1.30384	1.14139	PAX9
ENSSSCG00000001952	NFKBIA	24.9463	33.4999	53.0369	NFKBIA
ENSSSCG00000001959	CFL2	139.322	266.181	218.657	CFL2
ENSSSCG00000001964	NPAS3	18.5412	7.76223	3.95835	NPAS3
ENSSSCG00000001972	AP4S1	3.98668	4.00773	5.61221	AP4S1
ENSSSCG00000001975	PRKD1	27.5439	30.054	37.3455	PRKD1
ENSSSCG00000001988	ADCY4	2.94973	4.80615	8.67391	ADCY4
ENSSSCG00000002005	EMC9	1.56256	1.16448	2.4934	EMC9
ENSSSCG00000002007	FITM1	33.3553	129.188	181.55	FITM1
ENSSSCG00000002012	CARMIL3	5.95981	0.890628	0.75996	CARMIL3
ENSSSCG00000002014	JPH4	36.8741	11.6692	8.89266	JPH4
ENSSSCG00000002028	CMTM5	1.07172	0.323497	0.380984	CMTM5
ENSSSCG00000002029	MYH7	61.0574	293.639	215.271	MYH7
ENSSSCG00000002039	MMP14	587.653	1023.18	677.269	MMP14
ENSSSCG00000002051	ABHD4	11.6544	16.7429	20.0216	ABHD4
ENSSSCG00000002135	PNP	7.45944	2.62819	2.5916	PNP
ENSSSCG00000002140	KLHL33	0.263351	1.54641	15.8965	KLHL33
ENSSSCG00000002263	SLCO3A1	19.6748	32.4112	21.5736	SLCO3A1
ENSSSCG00000002267	RGMA	161.445	194.406	216.668	RGMA
ENSSSCG00000002277	SPTB	39.1077	199.628	289.049	SPTB
ENSSSCG00000002280	RAB15	31.0487	8.31207	5.46922	RAB15
ENSSSCG00000002290	PLEK2	3.95467	1.35532	1.33392	PLEK2
ENSSSCG00000002297	RDH12	0.936631	1.61864	1.66751	RDH12
ENSSSCG00000002329	MAP3K9	4.94514	1.44232	0.633405	MAP3K9
ENSSSCG00000002333	DPF3	1.89908	1.52077	2.99219	DPF3
ENSSSCG00000002341	PAPLN	12.1005	22.7237	19.9875	PAPLN
ENSSSCG00000002349	ACOT4	10.8428	12.9413	18.7097	ACOT4
ENSSSCG00000002375	RPS6KL1	7.26839	2.03969	1.19072	RPS6KL1
ENSSSCG00000002387	GPATCH2L	3.30183	1.18076	0.847301	GPATCH2L
ENSSSCG00000002388	ESRRB	3.53097	6.14047	13.1802	ESRRB
ENSSSCG00000002396	GSTZ1	5.99968	9.41531	13.3215	GSTZ1
ENSSSCG00000002398	TMEM63C	4.45625	0.617326	0.244937	TMEM63C
ENSSSCG00000002412	STON2	5.22038	5.48291	10.0161	STON2
ENSSSCG00000002427	EML5	1.44559	0.1215	0.241837	EML5
ENSSSCG00000002428	TTC8	7.57486	3.45498	2.39376	TTC8
ENSSSCG00000002431	TDP1	13.5821	6.02312	4.51804	TDP1
ENSSSCG00000002440	CCDC88C	9.74735	10.4905	15.503	CCDC88C
ENSSSCG00000002449	protein_coding	241.898	308.253	337.046	protein_coding
ENSSSCG00000002451	RIN3	23.0105	35.5338	39.3526	RIN3
ENSSSCG00000002456	CHGA	28.0948	0.765864	0.74001	CHGA
ENSSSCG00000002464	protein_coding	5.53022	8.30439	16.9773	protein_coding
ENSSSCG00000002467	ASB2	7.43763	29.8695	59.2798	ASB2
ENSSSCG00000002474	PPP4R4	2.35463	0.366253	0.455845	PPP4R4
ENSSSCG00000002494	CLMN	6.80871	3.10309	2.00146	CLMN
ENSSSCG00000002510	CYP46A1	6.34236	2.86933	1.34666	CYP46A1
ENSSSCG00000002520	SLC25A29	131.127	41.5898	38.5764	SLC25A29
ENSSSCG00000002573	RTL1	1.84891	4.75175	5.62942	RTL1
ENSSSCG00000002627	GSTA4	43.16	20.7079	12.7943	GSTA4
ENSSSCG00000002635	SPIRE2	43.8633	8.43692	7.27898	SPIRE2
ENSSSCG00000002637	DBNDD1	25.176	4.50814	2.23003	DBNDD1
ENSSSCG00000002639	protein_coding	450.198	0.44984	0.735483	protein_coding
ENSSSCG00000002642	CDH15	304.818	632.512	401.133	CDH15
ENSSSCG00000002653	protein_coding	31.0973	8.01318	4.73075	protein_coding
ENSSSCG00000002654	FBXO31	50.687	57.2502	79.6015	FBXO31
ENSSSCG00000002681	HSDL1	43.4164	21.6366	14.1316	HSDL1
ENSSSCG00000002684	CDH13	52.271	63.4175	118.33	CDH13
ENSSSCG00000002690	GAN	6.71604	3.19885	2.24614	GAN
ENSSSCG00000002696	VAT1L	38.9826	4.0088	2.34971	VAT1L
ENSSSCG00000002709	protein_coding	61.7522	75.1591	18.8229	protein_coding
ENSSSCG00000002712	LDHD	0.923248	2.42641	1.46465	LDHD
ENSSSCG00000002718	FA2H	1.61465	2.57005	1.42481	FA2H
ENSSSCG00000002739	PHLPP2	6.10769	2.78036	1.71172	PHLPP2
ENSSSCG00000002747	PMFBP1	2.40071	0.445465	0.212522	PMFBP1
ENSSSCG00000002752	ZFHX3	24.4729	7.25379	3.642	ZFHX3
ENSSSCG00000002755	NFAT5	26.0745	6.10706	4.03808	NFAT5
ENSSSCG00000002764	SMPD3	25.1374	1.40704	0.712252	SMPD3
ENSSSCG00000002767	TSNAXIP1	3.01884	0.561107	0.70596	TSNAXIP1
ENSSSCG00000002768	CENPT	22.3662	7.38906	7.65742	CENPT
ENSSSCG00000002777	HSD11B2	1.85928	6.10726	2.18012	HSD11B2
ENSSSCG00000002779	LRRC36	1.40338	1.06077	2.74682	LRRC36
ENSSSCG00000002788	EXOC3L1	0.834462	1.09355	3.27517	EXOC3L1
ENSSSCG00000002793	protein_coding	2.19659	2.82314	3.46092	protein_coding
ENSSSCG00000002795	CDH11	270.806	74.1129	34.1023	CDH11
ENSSSCG00000002806	MMP15	117.194	154.941	203.283	MMP15
ENSSSCG00000002815	ADGRG1	25.5564	12.996	26.4719	ADGRG1
ENSSSCG00000002818	PLLP	0.755518	1.322	2.51651	PLLP
ENSSSCG00000002827	SLC6A2	1.65245	2.64297	1.30061	SLC6A2
ENSSSCG00000002829	MMP2	1453.46	2377.73	1514.37	MMP2
ENSSSCG00000002830	IRX6	10.1846	1.67022	0.405012	IRX6
ENSSSCG00000002831	IRX3	128.622	44.6193	25.6806	IRX3
ENSSSCG00000002835	TOX3	12.5294	3.15564	1.41202	TOX3
ENSSSCG00000002847	GPT2	33.848	8.09714	3.58788	GPT2
ENSSSCG00000002852	PLEKHF1	2.7605	7.19024	19.02	PLEKHF1
ENSSSCG00000002857	TDRD12	23.1619	11.9868	7.51416	TDRD12
ENSSSCG00000002864	SLC7A10	29.2596	50.4609	26.4583	SLC7A10
ENSSSCG00000002866	CEBPA	22.811	33.0137	44.3541	CEBPA
ENSSSCG00000002887	MAG	1.37923	2.52054	2.86984	MAG
ENSSSCG00000002906	protein_coding	12.0289	22.309	19.9137	protein_coding
ENSSSCG00000002907	protein_coding	179.489	169.365	286.228	protein_coding
ENSSSCG00000002915	KIRREL2	1.94035	2.33871	5.58844	KIRREL2
ENSSSCG00000002916	APLP1	198.615	36.2763	19.1582	APLP1
ENSSSCG00000002919	TYROBP	24.5369	53.5395	57.1536	TYROBP
ENSSSCG00000002921	CLIP3	51.084	23.5334	13.2807	CLIP3
ENSSSCG00000002927	LRFN3	13.7606	2.71982	2.24478	LRFN3
ENSSSCG00000002954	SPINT2	63.0081	14.3747	11.9064	SPINT2
ENSSSCG00000002955	CATSPERG	21.1193	6.84717	9.11324	CATSPERG
ENSSSCG00000002960	RASGRP4	2.10687	3.12843	4.13104	RASGRP4
ENSSSCG00000002980	AWN	21.4105	31.2822	5.39929	AWN
ENSSSCG00000002989	AKT2	110.628	140.532	151.896	AKT2
ENSSSCG00000002996	protein_coding	1.94895	0.561435	0.855938	protein_coding
ENSSSCG00000002997	protein_coding	202.93	6.25683	4.59502	protein_coding
ENSSSCG00000003017	TGFB1	43.0388	46.6402	70.0525	TGFB1
ENSSSCG00000003022	TMEM145	13.4289	2.22301	3.52718	TMEM145
ENSSSCG00000003038	GRIK5	31.4301	4.76379	2.95752	GRIK5
ENSSSCG00000003061	CADM4	165.321	38.0546	26.5802	CADM4
ENSSSCG00000003081	CEACAM16	0.500071	1.67333	8.51376	CEACAM16
ENSSSCG00000003088	APOE	182.002	278.389	327.048	APOE
ENSSSCG00000003102	protein_coding	27.2779	8.90382	5.79343	protein_coding
ENSSSCG00000003108	NPAS1	0.77828	2.8895	0.29888	NPAS1
ENSSSCG00000003112	protein_coding	12.05	20.5193	20.0872	protein_coding
ENSSSCG00000003115	MEIS3	192.777	63.03	51.1012	MEIS3
ENSSSCG00000003120	NAPA	77.0405	110.302	108.842	NAPA
ENSSSCG00000003133	GRIN2D	14.5465	6.19985	1.99592	GRIN2D
ENSSSCG00000003137	PLEKHA4	62.3686	154.424	87.2265	PLEKHA4
ENSSSCG00000003139	BCAT2	51.6019	46.4385	70.1187	BCAT2
ENSSSCG00000003143	MAMSTR	33.3849	115.606	119.933	MAMSTR
ENSSSCG00000003148	DBP	8.66728	20.2135	29.6032	DBP
ENSSSCG00000003154	GYS1	65.5333	124.002	153.21	GYS1
ENSSSCG00000003156	HRC	106.986	198.639	372.275	HRC
ENSSSCG00000003159	KCNA7	5.19855	17.6551	36.5636	KCNA7
ENSSSCG00000003160	NTF4	14.7716	5.01903	14.6557	NTF4
ENSSSCG00000003161	PRRG2	6.61857	6.35683	12.7491	PRRG2
ENSSSCG00000003170	SLC17A7	2.0992	0.612472	0.489312	SLC17A7
ENSSSCG00000003183	RRAS	114.54	398.307	521.396	RRAS
ENSSSCG00000003193	TBC1D17	37.3939	44.7908	51.9716	TBC1D17
ENSSSCG00000003194	AKT1S1	157.436	219.502	315.052	AKT1S1
ENSSSCG00000003211	NR1H2	45.5286	59.1208	61.1299	NR1H2
ENSSSCG00000003217	ASPDH	79.7361	85.8217	140.168	ASPDH
ENSSSCG00000003218	MYBPC2	1.1797	9.71493	144.666	MYBPC2
ENSSSCG00000003219	FAM71E1	7.1038	9.64915	9.52559	FAM71E1
ENSSSCG00000003222	SYT3	6.21616	0.995952	1.33101	SYT3
ENSSSCG00000003227	protein_coding	13.121	3.41877	0.339351	protein_coding
ENSSSCG00000003230	protein_coding	0.375683	0.146086	0.991945	protein_coding
ENSSSCG00000003231	NKG7	4.67267	7.97072	8.80423	NKG7
ENSSSCG00000003236	protein_coding	0.220982	0.491337	0.612737	protein_coding
ENSSSCG00000003238	SPACA6	15.9038	3.43902	5.79825	SPACA6
ENSSSCG00000003241	ZNF614	3.08348	1.41776	1.00675	ZNF614
ENSSSCG00000003253	protein_coding	106.435	160.969	182.404	protein_coding
ENSSSCG00000003257	CACNG6	13.0055	30.7348	43.655	CACNG6
ENSSSCG00000003271	TTYH1	4.54542	0.61073	0.908084	TTYH1
ENSSSCG00000003344	VWA1	74.8481	167.452	206.555	VWA1
ENSSSCG00000003348	protein_coding	116.633	149.058	166.466	protein_coding
ENSSSCG00000003350	MIB2	122.605	152.216	191.123	MIB2
ENSSSCG00000003351	MMP23B	51.8863	196.738	212.858	MMP23B
ENSSSCG00000003356	MMEL1	1.00531	1.15542	2.85632	MMEL1
ENSSSCG00000003366	CHD5	14.0979	1.27545	1.83945	CHD5
ENSSSCG00000003368	RNF207	5.06462	10.1258	38.2155	RNF207
ENSSSCG00000003371	GPR153	194.944	96.2593	53.8573	GPR153
ENSSSCG00000003374	ESPN	3.25302	5.02433	2.99958	ESPN
ENSSSCG00000003377	ACOT7	36.52	7.02285	3.94923	ACOT7
ENSSSCG00000003379	KLHL21	21.923	25.4542	29.7941	KLHL21
ENSSSCG00000003382	TAS1R1	2.79931	2.93412	1.04684	TAS1R1
ENSSSCG00000003393	TMEM201	26.8073	25.2076	41.1737	TMEM201
ENSSSCG00000003399	RBP7	2.13826	4.8735	6.4637	RBP7
ENSSSCG00000003407	CASZ1	17.1918	24.7855	23.2054	CASZ1
ENSSSCG00000003423	DRAXIN	12.7236	1.06454	0.408764	DRAXIN
ENSSSCG00000003434	MFN2	55.1712	69.5164	95.4439	MFN2
ENSSSCG00000003435	MIIP	19.6849	23.5401	26.7485	MIIP
ENSSSCG00000003439	DHRS3	111.526	117.47	157.876	DHRS3
ENSSSCG00000003449	LRRC38	2.10622	14.525	35.3304	LRRC38
ENSSSCG00000003455	FHAD1	2.34138	1.98295	0.805932	FHAD1
ENSSSCG00000003486	ARHGEF10L	28.0305	30.8626	47.2372	ARHGEF10L
ENSSSCG00000003506	PINK1	41.3787	73.7041	83.8243	PINK1
ENSSSCG00000003508	KIF17	9.86478	15.6377	7.51303	KIF17
ENSSSCG00000003509	SH2D5	6.40863	2.00253	0.632771	SH2D5
ENSSSCG00000003513	ECE1	117.798	125.624	168.959	ECE1
ENSSSCG00000003514	HSPG2	384.645	548.095	709.144	HSPG2
ENSSSCG00000003521	protein_coding	22.2302	7.67021	17.436	protein_coding
ENSSSCG00000003524	C1QA	19.8554	39.3367	64.8824	C1QA
ENSSSCG00000003547	NCMAP	11.4194	1.52982	4.62326	NCMAP
ENSSSCG00000003549	LDLRAP1	18.9736	27.181	29.6353	LDLRAP1
ENSSSCG00000003551	PAQR7	11.8197	3.78382	1.48611	PAQR7
ENSSSCG00000003582	SMPDL3B	0.535473	0.854284	2.30186	SMPDL3B
ENSSSCG00000003590	PTPRU	26.8528	3.498	4.4714	PTPRU
ENSSSCG00000003592	SDC3	297.447	137.752	82.3923	SDC3
ENSSSCG00000003600	TINAGL1	15.3595	15.499	27.0312	TINAGL1
ENSSSCG00000003603	COL16A1	500.496	550.526	251.85	COL16A1
ENSSSCG00000003604	ADGRB2	100.734	37.4076	19.954	ADGRB2
ENSSSCG00000003616	FAM167B	1.3399	9.52504	18.7799	FAM167B
ENSSSCG00000003640	GRIK3	3.77527	0.252984	0.281961	GRIK3
ENSSSCG00000003644	FHL3	110.624	113.828	200.747	FHL3
ENSSSCG00000003654	MACF1	76.274	41.8924	25.3874	MACF1
ENSSSCG00000003662	NT5C1A	0.457093	5.71724	7.60253	NT5C1A
ENSSSCG00000003669	MFSD2A	11.2265	5.46475	0.666822	MFSD2A
ENSSSCG00000003687	EPB41L3	61.3353	43.3278	14.8304	EPB41L3
ENSSSCG00000003690	DLGAP1	3.31739	0.635584	0.203582	DLGAP1
ENSSSCG00000003693	MYOM1	102.46	225.947	165.753	MYOM1
ENSSSCG00000003694	EMILIN2	203.977	341.274	365.046	EMILIN2
ENSSSCG00000003708	ANKRD29	9.75131	16.9442	14.5536	ANKRD29
ENSSSCG00000003709	LAMA3	3.4069	5.57242	8.22477	LAMA3
ENSSSCG00000003715	ZNF521	79.126	34.1663	21.464	ZNF521
ENSSSCG00000003719	KCTD1	13.4791	4.57779	6.74088	KCTD1
ENSSSCG00000003721	CHST9	5.14131	1.03007	1.8987	CHST9
ENSSSCG00000003722	CDH2	111.187	10.1133	3.65969	CDH2
ENSSSCG00000003729	RNF125	7.65085	7.17742	10.2189	RNF125
ENSSSCG00000003736	ASXL3	9.68086	5.10653	2.5536	ASXL3
ENSSSCG00000003757	SSX2IP	7.23743	6.51984	3.03681	SSX2IP
ENSSSCG00000003762	ADGRL4	8.51439	10.8456	18.282	ADGRL4
ENSSSCG00000003763	IFI44	1.52195	3.45851	5.59538	IFI44
ENSSSCG00000003766	DNAJB4	43.7607	45.7163	88.7713	DNAJB4
ENSSSCG00000003768	NEXN	98.8942	125.316	156.187	NEXN
ENSSSCG00000003776	ACADM	40.9384	45.8662	87.692	ACADM
ENSSSCG00000003788	PTGER3	3.89659	0.264371	0.558172	PTGER3
ENSSSCG00000003792	protein_coding	20.8268	8.60343	6.47012	protein_coding
ENSSSCG00000003793	LRRC7	3.65058	0.9056	0.54519	LRRC7
ENSSSCG00000003795	WLS	71.0531	20.533	18.1974	WLS
ENSSSCG00000003797	DIRAS3	30.1727	2.85148	1.46658	DIRAS3
ENSSSCG00000003805	PDE4B	13.0339	9.04208	17.7037	PDE4B
ENSSSCG00000003807	DNAJC6	11.8898	0.662977	0.422631	DNAJC6
ENSSSCG00000003811	ROR1	18.8651	4.23118	2.11878	ROR1
ENSSSCG00000003812	PGM1	13.6514	34.1824	41.4088	PGM1
ENSSSCG00000003818	DOCK7	15.1475	6.05633	3.8782	DOCK7
ENSSSCG00000003821	KANK4	28.5638	9.26103	9.87163	KANK4
ENSSSCG00000003825	CYP2J34	0.658378	0.134295	0.126439	CYP2J34
ENSSSCG00000003832	TACSTD2	23.7282	1.11388	0.189686	TACSTD2
ENSSSCG00000003833	DAB1	3.26842	0.375503	0.172665	DAB1
ENSSSCG00000003848	LRP8	12.9161	1.76282	1.11323	LRP8
ENSSSCG00000003854	ECHDC2	17.7081	18.1181	24.511	ECHDC2
ENSSSCG00000003876	CDKN2C	31.5363	48.7856	53.7577	CDKN2C
ENSSSCG00000003888	STIL	9.32563	3.55688	2.94587	STIL
ENSSSCG00000003901	FAAH	6.07178	10.2288	9.32421	FAAH
ENSSSCG00000003903	protein_coding	101.706	129.977	236.378	protein_coding
ENSSSCG00000003909	protein_coding	30.3592	15.762	7.40851	protein_coding
ENSSSCG00000003920	pseudogene	6.68872	17.5384	33.9293	pseudogene
ENSSSCG00000003921	ZSWIM5	8.65329	1.04868	0.840508	ZSWIM5
ENSSSCG00000003931	KIF2C	37.7893	16.2665	12.4453	KIF2C
ENSSSCG00000003950	TIE1	60.0446	78.3808	135.216	TIE1
ENSSSCG00000003965	CCDC30	1.99518	0.367723	0.3644	CCDC30
ENSSSCG00000003975	KCNQ4	2.58841	40.3318	126.471	KCNQ4
ENSSSCG00000003988	protein_coding	4.48206	1.70243	1.30051	protein_coding
ENSSSCG00000004001	protein_coding	2.4477	2.57102	0.774761	protein_coding
ENSSSCG00000004012	THBS2	425.629	589.857	254.007	THBS2
ENSSSCG00000004016	protein_coding	3.21477	2.08219	4.46765	protein_coding
ENSSSCG00000004023	CEP43	14.6264	6.66505	4.33588	CEP43
ENSSSCG00000004027	PDE10A	12.7205	5.10428	4.10272	PDE10A
ENSSSCG00000004033	AGPAT4	8.22387	2.83676	2.41358	AGPAT4
ENSSSCG00000004039	SLC22A3	4.65272	10.6393	6.67369	SLC22A3
ENSSSCG00000004049	ACAT2	45.957	18.6549	5.82985	ACAT2
ENSSSCG00000004052	FNDC1	340.972	1232.58	356.718	FNDC1
ENSSSCG00000004075	RGS17	5.31137	0.826305	0.568228	RGS17
ENSSSCG00000004081	protein_coding	1.16859	0.274878	0.1937	protein_coding
ENSSSCG00000004082	protein_coding	20.8545	38.4692	41.0314	protein_coding
ENSSSCG00000004094	PPP1R14C	2.37521	0.108578	0.274262	PPP1R14C
ENSSSCG00000004101	LRP11	6.94166	2.55355	4.92732	LRP11
ENSSSCG00000004121	FBXO30	9.04213	8.61906	13.9793	FBXO30
ENSSSCG00000004125	STX11	3.28869	10.2528	7.23836	STX11
ENSSSCG00000004128	ZC2HC1B	4.74274	16.8658	0.670734	ZC2HC1B
ENSSSCG00000004133	FUCA2	41.1667	65.1996	56.2858	FUCA2
ENSSSCG00000004139	ADGRG6	26.842	4.80398	4.85	ADGRG6
ENSSSCG00000004143	TXLNB	10.863	47.1359	70.6557	TXLNB
ENSSSCG00000004145	ABRACL	70.3941	23.5328	13.8746	ABRACL
ENSSSCG00000004149	NHSL1	23.4631	22.1839	9.52353	NHSL1
ENSSSCG00000004150	protein_coding	17.2608	21.9753	5.65363	protein_coding
ENSSSCG00000004154	TNFAIP3	8.69172	10.094	11.8912	TNFAIP3
ENSSSCG00000004156	IFNGR1	14.1939	16.0579	18.9088	IFNGR1
ENSSSCG00000004164	MTFR2	2.39057	1.11556	0.73769	MTFR2
ENSSSCG00000004165	PDE7B	8.7373	9.26478	17.1887	PDE7B
ENSSSCG00000004167	MYB	0.601164	0.171109	0.124318	MYB
ENSSSCG00000004170	protein_coding	7.57544	2.90301	2.09331	protein_coding
ENSSSCG00000004191	MOXD1	75.5806	3.4904	6.11163	MOXD1
ENSSSCG00000004192	CCN2	257.968	88.3056	105.245	CCN2
ENSSSCG00000004193	ENPP1	14.135	4.78305	9.08852	ENPP1
ENSSSCG00000004201	TMEM200A	10.6445	8.37847	2.28354	TMEM200A
ENSSSCG00000004205	ARHGAP18	15.0221	20.4296	30.2724	ARHGAP18
ENSSSCG00000004207	protein_coding	25.8618	73.6917	107.517	protein_coding
ENSSSCG00000004218	RSPO3	29.4826	14.921	9.12603	RSPO3
ENSSSCG00000004232	CLVS2	4.15051	0.357737	0.117405	CLVS2
ENSSSCG00000004234	FABP7	66.0826	0.787074	0.503527	FABP7
ENSSSCG00000004236	PKIB	4.73571	2.43322	6.30468	PKIB
ENSSSCG00000004241	GJA1	201.572	67.1909	54.6102	GJA1
ENSSSCG00000004242	TBC1D32	5.73244	1.65401	1.12075	TBC1D32
ENSSSCG00000004249	CEP85L	11.542	14.9999	18.0843	CEP85L
ENSSSCG00000004250	SLC35F1	25.8097	3.3722	2.27225	SLC35F1
ENSSSCG00000004255	VGLL2	213.736	332.79	340.971	VGLL2
ENSSSCG00000004270	ADGRB3	7.1621	0.74514	0.38985	ADGRB3
ENSSSCG00000004274	COL9A1	947.765	8.95072	2.09844	COL9A1
ENSSSCG00000004280	RIMS1	12.9922	0.893425	0.371032	RIMS1
ENSSSCG00000004281	KCNQ5	6.46039	3.80039	14.9831	KCNQ5
ENSSSCG00000004291	NT5E	31.2819	63.8377	44.4873	NT5E
ENSSSCG00000004309	CNR1	19.8088	4.61652	0.876397	CNR1
ENSSSCG00000004318	RRAGD	15.2079	25.6651	23.1657	RRAGD
ENSSSCG00000004322	ANKRD6	10.6065	1.78319	1.95063	ANKRD6
ENSSSCG00000004328	MDN1	18.9646	9.25022	6.15999	MDN1
ENSSSCG00000004331	CASP8AP2	8.97746	3.78907	2.92411	CASP8AP2
ENSSSCG00000004332	BACH2	19.4725	7.96108	3.96072	BACH2
ENSSSCG00000004336	EPHA7	20.2472	4.19639	1.88099	EPHA7
ENSSSCG00000004340	FHL5	1.21186	5.80214	9.93953	FHL5
ENSSSCG00000004344	MMS22L	3.85921	1.40182	1.01247	MMS22L
ENSSSCG00000004347	FBXL4	4.97707	5.10783	8.63536	FBXL4
ENSSSCG00000004361	GRIK2	11.0048	3.19637	2.28058	GRIK2
ENSSSCG00000004366	BVES	5.15437	9.24986	10.0246	BVES
ENSSSCG00000004367	POPDC3	9.2863	40.2104	52.874	POPDC3
ENSSSCG00000004369	PRDM1	3.44319	4.29576	6.66916	PRDM1
ENSSSCG00000004371	CRYBG1	1.12601	1.29225	1.52204	CRYBG1
ENSSSCG00000004390	SESN1	14.8228	29.2787	32.9998	SESN1
ENSSSCG00000004401	DDO	0.174755	2.4311	5.2822	DDO
ENSSSCG00000004420	TRAF3IP2	2.16329	2.1769	3.22151	TRAF3IP2
ENSSSCG00000004423	TUBE1	9.13197	2.07398	2.33423	TUBE1
ENSSSCG00000004433	HS3ST5	3.36869	0.568374	0.680054	HS3ST5
ENSSSCG00000004452	PRSS35	128.294	112.885	26.5059	PRSS35
ENSSSCG00000004453	SNAP91	31.8763	18.2611	4.18655	SNAP91
ENSSSCG00000004454	ME1	8.22909	5.8851	1.67314	ME1
ENSSSCG00000004458	TPBG	189.113	48.9106	17.1441	TPBG
ENSSSCG00000004466	TTK	14.9302	5.06548	4.20831	TTK
ENSSSCG00000004469	LCA5	2.37812	0.851247	0.771853	LCA5
ENSSSCG00000004473	PHIP	31.0398	11.1178	5.83126	PHIP
ENSSSCG00000004484	COL12A1	770.784	603.718	162.382	COL12A1
ENSSSCG00000004485	CD109	30.2649	10.1911	7.41105	CD109
ENSSSCG00000004490	SETBP1	35.522	13.9965	9.94408	SETBP1
ENSSSCG00000004499	ATP5F1A	80.5073	79.7422	125.18	ATP5F1A
ENSSSCG00000004509	LIPG	7.03809	4.68319	0.839404	LIPG
ENSSSCG00000004510	ACAA2	20.2631	20.4586	29.0806	ACAA2
ENSSSCG00000004511	protein_coding	1.99185	0.54728	0.822597	protein_coding
ENSSSCG00000004520	MAPK4	8.28987	3.15879	1.19995	MAPK4
ENSSSCG00000004547	protein_coding	18.1951	22.9126	27.5246	protein_coding
ENSSSCG00000004548	PIF1	8.2339	2.48165	2.29651	PIF1
ENSSSCG00000004565	CA12	4.20292	0.100813	0.336077	CA12
ENSSSCG00000004570	TPM1	241.966	792.195	1068.71	TPM1
ENSSSCG00000004573	protein_coding	4.82762	11.7902	3.71744	protein_coding
ENSSSCG00000004576	RORA	2.03723	2.10632	2.93716	RORA
ENSSSCG00000004596	LIPC	0.218767	1.1715	2.61325	LIPC
ENSSSCG00000004597	AQP9	1.62894	2.33858	2.28756	AQP9
ENSSSCG00000004601	MNS1	8.83178	4.22539	2.7732	MNS1
ENSSSCG00000004607	PYGO1	17.5656	6.60334	5.45362	PYGO1
ENSSSCG00000004608	DNAAF4	1.37877	0.571633	0.328221	DNAAF4
ENSSSCG00000004628	TMOD2	24.2313	4.77348	3.62901	TMOD2
ENSSSCG00000004629	LYSMD2	5.83011	8.09512	10.5578	LYSMD2
ENSSSCG00000004630	SCG3	11.0714	0.762633	1.60261	SCG3
ENSSSCG00000004646	ATP8B4	2.69618	0.39094	0.423976	ATP8B4
ENSSSCG00000004656	protein_coding	507.93	267.867	154.676	protein_coding
ENSSSCG00000004657	CEP152	4.32964	1.28718	0.838161	CEP152
ENSSSCG00000004661	MYEF2	20.5531	6.42873	4.34063	MYEF2
ENSSSCG00000004666	protein_coding	1.42651	1.30919	2.04785	protein_coding
ENSSSCG00000004674	SHF	65.6679	21.0445	19.8445	SHF
ENSSSCG00000004678	DUOX2	0.227865	0.314678	0.780003	DUOX2
ENSSSCG00000004687	B2M	11.7485	24.8287	43.6186	B2M
ENSSSCG00000004694	FRMD5	3.57893	0.385997	0.809827	FRMD5
ENSSSCG00000004705	MAP1A	37.7106	26.6311	10.3514	MAP1A
ENSSSCG00000004718	TTBK2	12.7179	4.33325	2.25752	TTBK2
ENSSSCG00000004725	ZNF106	208.546	191.402	72.2958	ZNF106
ENSSSCG00000004728	CAPN3	15.8886	80.3594	94.5738	CAPN3
ENSSSCG00000004729	protein_coding	3.40326	4.94803	9.36911	protein_coding
ENSSSCG00000004736	SPTBN5	0.438944	0.739734	0.718935	SPTBN5
ENSSSCG00000004755	DLL4	21.2888	24.0504	45.8619	DLL4
ENSSSCG00000004774	IVD	23.6107	28.8209	35.5574	IVD
ENSSSCG00000004776	DISP2	2.22898	0.438253	0.258856	DISP2
ENSSSCG00000004782	protein_coding	36.2788	13.8991	10.4456	protein_coding
ENSSSCG00000004787	GPR176	8.76631	3.52565	2.70544	GPR176
ENSSSCG00000004789	THBS1	333.834	114.497	71.8778	THBS1
ENSSSCG00000004791	RASGRP1	2.30728	5.83037	5.33345	RASGRP1
ENSSSCG00000004795	MEIS2	54.0204	9.63671	6.49011	MEIS2
ENSSSCG00000004802	AQR	34.3316	12.0806	8.98488	AQR
ENSSSCG00000004803	ACTC1	6600.77	14297.6	10266.2	ACTC1
ENSSSCG00000004806	protein_coding	22.174	10.2353	5.69761	protein_coding
ENSSSCG00000004807	SCG5	13.9356	1.91844	0.24988	SCG5
ENSSSCG00000004822	ALDH1A3	21.6571	35.0365	22.1415	ALDH1A3
ENSSSCG00000004825	CHSY1	73.5117	40.577	24.2216	CHSY1
ENSSSCG00000004831	protein_coding	4.12881	7.78472	6.26668	protein_coding
ENSSSCG00000004840	OTUD7A	1.10059	0.396852	1.0341	OTUD7A
ENSSSCG00000004849	APBA2	23.016	1.70887	0.714874	APBA2
ENSSSCG00000004850	FAM189A1	9.81675	3.51642	1.44858	FAM189A1
ENSSSCG00000004885	CDH19	5.85446	0.848579	1.14409	CDH19
ENSSSCG00000004886	CDH7	5.89278	1.04252	0.904519	CDH7
ENSSSCG00000004898	TNFRSF11A	2.90651	3.25812	4.82351	TNFRSF11A
ENSSSCG00000004903	CDH20	6.50037	2.0612	1.74801	CDH20
ENSSSCG00000004918	ALPK2	7.49317	10.0863	18.544	ALPK2
ENSSSCG00000004921	ATP8B1	5.94895	7.67775	8.37261	ATP8B1
ENSSSCG00000004928	CILP	53.2806	193.044	161.323	CILP
ENSSSCG00000004937	SLC24A1	0.328042	0.9755	0.234637	SLC24A1
ENSSSCG00000004939	MEGF11	5.36079	0.459316	0.468366	MEGF11
ENSSSCG00000004966	NOX5	0.302673	0.936911	1.52865	NOX5
ENSSSCG00000004969	KIF23	37.2971	13.8096	11.1402	KIF23
ENSSSCG00000004976	LRRC49	4.98506	1.51147	0.672241	LRRC49
ENSSSCG00000004990	LRFN5	7.74359	1.81192	1.82994	LRFN5
ENSSSCG00000005000	FANCM	3.89741	1.22296	0.925304	FANCM
ENSSSCG00000005002	MDGA2	2.7037	0.50162	0.368736	MDGA2
ENSSSCG00000005020	ATL1	7.16211	1.31556	1.42149	ATL1
ENSSSCG00000005022	NIN	14.2136	7.98836	4.71251	NIN
ENSSSCG00000005036	GPR137C	10.9394	2.19351	2.37221	GPR137C
ENSSSCG00000005045	BMP4	22.7248	6.17528	8.42911	BMP4
ENSSSCG00000005052	WDHD1	22.2273	9.32987	6.62868	WDHD1
ENSSSCG00000005056	DLGAP5	33.642	11.905	6.9219	DLGAP5
ENSSSCG00000005071	ARMH4	54.3146	22.9384	9.17992	ARMH4
ENSSSCG00000005076	KIAA0586	14.1761	6.94696	4.42809	KIAA0586
ENSSSCG00000005081	LRRC9	2.14614	0.506467	0.41749	LRRC9
ENSSSCG00000005095	protein_coding	6.9483	6.80229	11.8407	protein_coding
ENSSSCG00000005106	NTRK3	13.3651	1.21333	1.43508	NTRK3
ENSSSCG00000005122	TEK	10.3179	10.9936	16.7848	TEK
ENSSSCG00000005124	IFT74	9.19865	3.84244	2.71654	IFT74
ENSSSCG00000005128	TUSC1	53.2468	71.6912	96.5897	TUSC1
ENSSSCG00000005177	SH3GL2	6.50386	2.69992	1.50794	SH3GL2
ENSSSCG00000005180	BNC2	20.7767	5.52277	3.13916	BNC2
ENSSSCG00000005182	CCDC171	0.953122	0.35133	0.286803	CCDC171
ENSSSCG00000005183	PSIP1	160.581	68.5126	48.2404	PSIP1
ENSSSCG00000005186	TTC39B	0.847403	0.252774	0.265757	TTC39B
ENSSSCG00000005194	PTPRD	111.192	36.1177	24.4925	PTPRD
ENSSSCG00000005199	GLDC	2.99787	0.567314	0.452735	GLDC
ENSSSCG00000005203	IL33	2.68927	9.1653	10.4965	IL33
ENSSSCG00000005207	ERMP1	7.95503	3.21442	1.98413	ERMP1
ENSSSCG00000005212	PLGRKT	26.4109	35.3479	55.5473	PLGRKT
ENSSSCG00000005222	SLC1A1	5.82806	0.809171	0.29825	SLC1A1
ENSSSCG00000005224	GLIS3	3.59673	0.909136	1.12238	GLIS3
ENSSSCG00000005249	FAM189A2	12.2582	54.5787	80.0449	FAM189A2
ENSSSCG00000005250	APBA1	18.7039	4.68503	2.59775	APBA1
ENSSSCG00000005252	PTAR1	11.9488	4.18601	2.83976	PTAR1
ENSSSCG00000005269	TRPM6	1.20327	0.249212	0.271935	TRPM6
ENSSSCG00000005297	DNAJB5	27.1232	39.6873	61.1231	DNAJB5
ENSSSCG00000005305	UNC13B	3.64706	1.60534	1.1825	UNC13B
ENSSSCG00000005310	TESK1	87.4474	118.155	117.44	TESK1
ENSSSCG00000005313	CCDC107	12.7516	16.3747	37.9682	CCDC107
ENSSSCG00000005316	TPM2	1769.52	10796.7	12539	TPM2
ENSSSCG00000005352	FRMPD1	6.7816	1.76346	0.580499	FRMPD1
ENSSSCG00000005366	NCBP1	23.3755	40.6455	37.2583	NCBP1
ENSSSCG00000005375	CORO2A	3.86757	1.34049	0.461784	CORO2A
ENSSSCG00000005380	COL15A1	122.394	206.255	449.518	COL15A1
ENSSSCG00000005385	NR4A3	2.11116	0.601187	1.16961	NR4A3
ENSSSCG00000005391	MSANTD3-TMEFF1	29.7297	9.78352	6.75305	MSANTD3-TMEFF1
ENSSSCG00000005393	PLPPR1	9.07737	0.709968	0.483395	PLPPR1
ENSSSCG00000005400	GRIN3A	26.007	6.45684	2.55796	GRIN3A
ENSSSCG00000005403	SMC2	17.1904	7.13954	4.98849	SMC2
ENSSSCG00000005446	EPB41L4B	5.1086	1.78912	2.06407	EPB41L4B
ENSSSCG00000005456	MUSK	18.2946	5.26404	3.25806	MUSK
ENSSSCG00000005465	SUSD1	1.03869	0.349744	0.486799	SUSD1
ENSSSCG00000005466	PTBP3	17.9616	6.33415	6.30945	PTBP3
ENSSSCG00000005467	HSDL2	18.7369	21.3587	27.3809	HSDL2
ENSSSCG00000005469	KIAA1958	6.47668	3.76273	1.65985	KIAA1958
ENSSSCG00000005471	SNX30	36.2591	18.5824	10.9267	SNX30
ENSSSCG00000005474	SAL1	17.8261	1.77623	1.46775	SAL1
ENSSSCG00000005484	ZNF618	43.0011	16.9013	10.145	ZNF618
ENSSSCG00000005486	KIF12	8.61034	2.27766	0.988915	KIF12
ENSSSCG00000005487	COL27A1	156.885	93.4977	22.9923	COL27A1
ENSSSCG00000005490	WHRN	12.5767	5.37498	3.93196	WHRN
ENSSSCG00000005494	TNC	278.232	93.5275	25.2468	TNC
ENSSSCG00000005498	PAPPA	10.0188	1.23616	0.596074	PAPPA
ENSSSCG00000005502	ASTN2	25.0811	2.53633	3.24279	ASTN2
ENSSSCG00000005503	TLR4	1.10282	1.67756	1.70223	TLR4
ENSSSCG00000005506	MEGF9	22.9134	8.92548	4.8973	MEGF9
ENSSSCG00000005512	C5	1.26497	0.313814	0.21914	C5
ENSSSCG00000005528	NDUFA8	210.27	275.53	439.305	NDUFA8
ENSSSCG00000005530	LHX6	4.84359	7.09234	9.05732	LHX6
ENSSSCG00000005582	STRBP	9.09466	2.83236	1.93794	STRBP
ENSSSCG00000005584	CRB2	2.8258	0.456872	0.101299	CRB2
ENSSSCG00000005587	NEK6	44.5304	18.4902	11.3297	NEK6
ENSSSCG00000005593	OLFML2A	140.288	291.485	192.681	OLFML2A
ENSSSCG00000005598	SCAI	9.13603	3.21169	1.81971	SCAI
ENSSSCG00000005601	HSPA5	806.074	319.389	242.141	HSPA5
ENSSSCG00000005604	PBX3	49.183	10.4002	7.22712	PBX3
ENSSSCG00000005607	RALGPS1	6.83003	1.56076	1.30237	RALGPS1
ENSSSCG00000005608	ANGPTL2	176.829	364.786	268.465	ANGPTL2
ENSSSCG00000005609	GARNL3	5.31469	2.95089	1.61125	GARNL3
ENSSSCG00000005617	STXBP1	46.4168	16.4107	14.9547	STXBP1
ENSSSCG00000005625	ENG	44.5198	62.878	102.377	ENG
ENSSSCG00000005627	AK1	108.169	416.087	649.246	AK1
ENSSSCG00000005650	CERCAM	97.3831	181.246	147.068	CERCAM
ENSSSCG00000005661	ENDOG	13.0689	15.3291	21.6083	ENDOG
ENSSSCG00000005663	protein_coding	8.50163	8.58336	11.3842	protein_coding
ENSSSCG00000005665	PHYHD1	1.88948	2.21493	5.24965	PHYHD1
ENSSSCG00000005668	SH3GLB2	59.3558	102.561	97.8486	SH3GLB2
ENSSSCG00000005669	MIGA2	30.5898	33.398	54.245	MIGA2
ENSSSCG00000005671	CRAT	52.095	81.9323	67.5579	CRAT
ENSSSCG00000005678	NTMT1	36.0512	35.7085	53.9067	NTMT1
ENSSSCG00000005699	HMCN2	1.09224	33.9923	95.9758	HMCN2
ENSSSCG00000005707	FIBCD1	5.03392	2.2483	0.974349	FIBCD1
ENSSSCG00000005710	LAMC3	19.9629	5.51729	2.68122	LAMC3
ENSSSCG00000005713	PLPP7	9.28526	29.0795	44.1856	PLPP7
ENSSSCG00000005751	COL5A1	2336.16	3423.52	1504.59	COL5A1
ENSSSCG00000005778	HSBP1L1	4.73236	7.72638	5.16868	HSBP1L1
ENSSSCG00000005780	KCNG2	3.01538	6.90804	4.4845	KCNG2
ENSSSCG00000005785	PCSK6	39.3664	39.5937	57.3058	PCSK6
ENSSSCG00000005895	C8orf82	32.851	49.4136	83.9481	C8orf82
ENSSSCG00000005901	GPT	30.9206	25.6574	55.7949	GPT
ENSSSCG00000005911	OPLAH	8.50113	14.3578	18.5209	OPLAH
ENSSSCG00000005915	pseudogene	77.094	86.6808	106.471	pseudogene
ENSSSCG00000005923	SPATC1	1.48325	2.81489	0.571947	SPATC1
ENSSSCG00000005928	MROH5	0.174448	2.17111	20.4913	MROH5
ENSSSCG00000005938	COL22A1	74.101	7.58211	13.4062	COL22A1
ENSSSCG00000005941	KHDRBS3	12.8506	2.3199	4.9851	KHDRBS3
ENSSSCG00000005946	CCN4	25.7422	8.05426	5.00119	CCN4
ENSSSCG00000005951	TMEM71	2.03511	0.705284	0.484349	TMEM71
ENSSSCG00000005953	KCNQ3	10.5371	1.52547	2.20461	KCNQ3
ENSSSCG00000005970	SQLE	100.195	43.5032	11.8814	SQLE
ENSSSCG00000005976	NDUFB9	147.819	234.345	418.052	NDUFB9
ENSSSCG00000005981	FBXO32	4.11658	10.448	6.8391	FBXO32
ENSSSCG00000005992	SHAS2	18.3788	8.58691	4.05218	SHAS2
ENSSSCG00000005994	SNTB1	16.2607	26.715	26.099	SNTB1
ENSSSCG00000005995	MTBP	6.40154	2.84241	1.94389	MTBP
ENSSSCG00000006002	CCN3	171.203	291.395	98.0283	CCN3
ENSSSCG00000006003	MAL2	4.22448	1.1751	1.28637	MAL2
ENSSSCG00000006018	TRPS1	21.5571	5.45349	3.08905	TRPS1
ENSSSCG00000006021	KCNV1	0.412956	0.855877	0	KCNV1
ENSSSCG00000006023	SYBU	16.5164	5.43369	7.36069	SYBU
ENSSSCG00000006031	TMEM74	4.5672	0.618441	0.655754	TMEM74
ENSSSCG00000006034	RSPO2	12.4573	10.0656	3.3386	RSPO2
ENSSSCG00000006035	ANGPT1	11.7782	3.73545	4.01505	ANGPT1
ENSSSCG00000006073	OSR2	50.1914	19.5597	13.6164	OSR2
ENSSSCG00000006082	MATN2	127.044	190.797	122.417	MATN2
ENSSSCG00000006105	GEM	17.9007	26.7777	19.7775	GEM
ENSSSCG00000006108	TMEM67	9.03837	3.54325	2.71863	TMEM67
ENSSSCG00000006115	RUNX1T1	29.211	11.0941	8.54472	RUNX1T1
ENSSSCG00000006121	PIP4P2	6.0424	1.88385	1.60427	PIP4P2
ENSSSCG00000006126	DECR1	26.384	26.8845	39.097	DECR1
ENSSSCG00000006132	MMP16	35.2968	13.9174	6.378	MMP16
ENSSSCG00000006140	CA2	2.75602	1.01541	3.29888	CA2
ENSSSCG00000006141	CA3	28.9104	770.523	686.563	CA3
ENSSSCG00000006145	E2F5	16.356	6.92076	3.44225	E2F5
ENSSSCG00000006149	RALYL	5.66325	1.15229	0.267283	RALYL
ENSSSCG00000006153	FABP5	42.0156	67.409	112.986	FABP5
ENSSSCG00000006156	protein_coding	35.7561	54.6802	34.7434	protein_coding
ENSSSCG00000006160	STMN2	392.66	9.92522	1.91786	STMN2
ENSSSCG00000006163	PKIA	222.039	338.9	298.107	PKIA
ENSSSCG00000006166	NDUFB8	178.595	200.124	264.304	NDUFB8
ENSSSCG00000006169	ZFHX4	22.0755	7.82887	4.43306	ZFHX4
ENSSSCG00000006171	CRISPLD1	145.94	31.2638	14.7446	CRISPLD1
ENSSSCG00000006173	GDAP1	7.60012	0.798567	0.486253	GDAP1
ENSSSCG00000006174	JPH1	24.6786	73.9736	99.3445	JPH1
ENSSSCG00000006183	SBSPON	3.45285	1.6703	3.73926	SBSPON
ENSSSCG00000006185	KCNB2	5.47261	0.336845	0.56698	KCNB2
ENSSSCG00000006197	SULF1	109.027	42.4728	22.8476	SULF1
ENSSSCG00000006213	protein_coding	1.73539	2.02603	4.82768	protein_coding
ENSSSCG00000006230	CLVS1	2.73148	0.423721	0.785821	CLVS1
ENSSSCG00000006233	CA8	4.28252	0.272784	0.474101	CA8
ENSSSCG00000006235	TOX	4.41919	2.20703	0.89379	TOX
ENSSSCG00000006238	CYP7A1	0.786094	1.84969	0.806319	CYP7A1
ENSSSCG00000006247	PLAG1	19.5807	6.21251	4.60119	PLAG1
ENSSSCG00000006262	RGS20	2.35861	0.890797	0.642588	RGS20
ENSSSCG00000006290	SLC19A2	7.39677	9.16741	10.4434	SLC19A2
ENSSSCG00000006294	NME7	3.35513	1.49939	1.04881	NME7
ENSSSCG00000006296	ATP1B1	72.4226	32.1895	113.238	ATP1B1
ENSSSCG00000006302	GPR161	26.516	7.99444	4.00836	GPR161
ENSSSCG00000006304	MPC2	14.171	18.6256	27.7148	MPC2
ENSSSCG00000006307	RCSD1	7.16725	22.6264	37.5457	RCSD1
ENSSSCG00000006310	POU2F1	3.18539	1.20178	0.929788	POU2F1
ENSSSCG00000006311	STYXL2	31.4116	95.3322	116.456	STYXL2
ENSSSCG00000006312	GPA33	0.067481	1.04945	3.72191	GPA33
ENSSSCG00000006321	FAM78B	10.8517	2.99577	1.74948	FAM78B
ENSSSCG00000006328	RXRG	41.5427	43.8397	19.9229	RXRG
ENSSSCG00000006331	PBX1	41.8603	14.5223	12.8873	PBX1
ENSSSCG00000006338	DDR2	75.4781	41.5233	17.248	DDR2
ENSSSCG00000006344	NOS1AP	4.1929	1.39508	1.5683	NOS1AP
ENSSSCG00000006345	OLFML2B	51.3417	149.087	161.162	OLFML2B
ENSSSCG00000006352	MPZ	50.6785	136.225	190.025	MPZ
ENSSSCG00000006357	FCER1G	6.68338	12.7355	13.7318	FCER1G
ENSSSCG00000006358	NDUFS2	144.949	141.823	200.824	NDUFS2
ENSSSCG00000006362	USP21	8.17937	2.1886	1.8672	USP21
ENSSSCG00000006369	F11R	32.9513	51.2931	80.4771	F11R
ENSSSCG00000006370	TSTD1	28.8716	10.1556	3.69901	TSTD1
ENSSSCG00000006372	ARHGAP30	1.60484	2.40355	2.5018	ARHGAP30
ENSSSCG00000006379	CD48	0.822865	1.47473	1.2971	CD48
ENSSSCG00000006383	VANGL2	48.3985	13.6784	9.63755	VANGL2
ENSSSCG00000006384	NHLH1	40.6234	4.95959	4.18377	NHLH1
ENSSSCG00000006390	CASQ1	20.0526	148.376	933.346	CASQ1
ENSSSCG00000006391	ATP1A2	19.1507	16.2138	51.7629	ATP1A2
ENSSSCG00000006396	IGSF9	20.9098	1.84607	1.54178	IGSF9
ENSSSCG00000006415	CADM3	40.7885	4.90567	8.65654	CADM3
ENSSSCG00000006418	protein_coding	3.06536	8.76618	14.776	protein_coding
ENSSSCG00000006463	PEAR1	34.5188	34.0733	47.9912	PEAR1
ENSSSCG00000006469	MRPL24	80.5028	101.197	118.328	MRPL24
ENSSSCG00000006472	CRABP2	491.829	242.195	91.7067	CRABP2
ENSSSCG00000006474	NES	1391.05	2044.93	1007.71	NES
ENSSSCG00000006482	MEF2D	44.1242	63.7979	74.9891	MEF2D
ENSSSCG00000006491	protein_coding	1.50588	3.0064	4.00685	protein_coding
ENSSSCG00000006497	MEX3A	49.2673	17.5514	4.86326	MEX3A
ENSSSCG00000006506	SYT11	35.023	6.02161	4.11735	SYT11
ENSSSCG00000006512	FDPS	2.75985	1.50514	0.78765	FDPS
ENSSSCG00000006518	HCN3	5.5443	2.37827	1.54292	HCN3
ENSSSCG00000006524	THBS3	37.4898	95.6627	41.7957	THBS3
ENSSSCG00000006526	TRIM46	8.48682	0.776449	0.607048	TRIM46
ENSSSCG00000006527	KRTCAP2	31.3363	36.2669	47.3152	KRTCAP2
ENSSSCG00000006530	EFNA1	38.1396	43.7119	73.1153	EFNA1
ENSSSCG00000006531	protein_coding	83.9429	10.6219	7.40128	protein_coding
ENSSSCG00000006533	ADAM15	26.3108	38.1042	55.1034	ADAM15
ENSSSCG00000006540	PBXIP1	144.221	184.854	221.019	PBXIP1
ENSSSCG00000006542	KCNN3	4.81741	8.45871	8.89786	KCNN3
ENSSSCG00000006546	TDRD10	6.59128	7.02076	11.2663	TDRD10
ENSSSCG00000006547	SHE	5.82598	6.98071	10.8907	SHE
ENSSSCG00000006556	TPM3	131.739	249.752	172.213	TPM3
ENSSSCG00000006568	DENND4B	43.4123	41.0851	59.7622	DENND4B
ENSSSCG00000006572	NPR1	43.2637	60.3663	72.7785	NPR1
ENSSSCG00000006581	lncRNA	136.537	139.175	196.942	lncRNA
ENSSSCG00000006590	S100A8	15.059	3.50407	3.02608	S100A8
ENSSSCG00000006592	protein_coding	51.8122	11.8518	0.885727	protein_coding
ENSSSCG00000006610	S100A11	320.626	180.194	100.357	S100A11
ENSSSCG00000006620	TUFT1	5.06485	2.43452	1.09061	TUFT1
ENSSSCG00000006621	protein_coding	3.98189	1.17168	1.05062	protein_coding
ENSSSCG00000006624	SELENBP1	2.66698	3.46617	5.76795	SELENBP1
ENSSSCG00000006631	TMOD4	2.53381	55.3001	218.083	TMOD4
ENSSSCG00000006632	SCNM1	50.4351	49.2728	69.3383	SCNM1
ENSSSCG00000006635	SEMA6C	48.4361	65.9653	138.045	SEMA6C
ENSSSCG00000006648	CTSS	6.88144	6.81248	9.625	CTSS
ENSSSCG00000006651	ADAMTSL4	22.0557	86.4076	68.2441	ADAMTSL4
ENSSSCG00000006664	MTMR11	21.8579	10.867	7.0071	MTMR11
ENSSSCG00000006666	SV2A	23.0417	0.555649	0.328406	SV2A
ENSSSCG00000006667	BOLA1	30.4971	47.1075	45.0419	BOLA1
ENSSSCG00000006678	FCGR1A	4.91674	1.60662	3.0105	FCGR1A
ENSSSCG00000006687	ITGA10	22.7514	7.06784	6.74201	ITGA10
ENSSSCG00000006696	GJA5	111.92	37.5326	37.0582	GJA5
ENSSSCG00000006718	ZNF697	26.0735	12.1295	8.05952	ZNF697
ENSSSCG00000006719	protein_coding	1.0862	4.08775	0.376207	protein_coding
ENSSSCG00000006720	HAO2	0.99043	1.54253	1.04645	HAO2
ENSSSCG00000006730	MAN1A2	26.0077	9.94831	7.5139	MAN1A2
ENSSSCG00000006743	SLC22A15	19.4466	10.4489	5.78108	SLC22A15
ENSSSCG00000006745	CASQ2	51.553	161.264	191.852	CASQ2
ENSSSCG00000006748	TSPAN2	6.81884	9.3825	2.43423	TSPAN2
ENSSSCG00000006754	AMPD1	5.37918	65.7253	87.595	AMPD1
ENSSSCG00000006758	SYT6	3.55614	0.733712	0.181223	SYT6
ENSSSCG00000006785	RAP1A	15.7316	19.7888	20.6783	RAP1A
ENSSSCG00000006788	ADORA3	0.338146	0.870988	0.754645	ADORA3
ENSSSCG00000006800	CD53	5.99827	8.6747	8.74118	CD53
ENSSSCG00000006810	KCNC4	2.85335	1.42371	7.06708	KCNC4
ENSSSCG00000006811	SLC6A17	11.3885	7.20869	3.34513	SLC6A17
ENSSSCG00000006821	GSTM3	94.9793	83.0905	32.29	GSTM3
ENSSSCG00000006829	SYPL2	13.7788	123.071	214.892	SYPL2
ENSSSCG00000006852	NTNG1	10.0172	0.871509	1.59045	NTNG1
ENSSSCG00000006857	COL11A1	682.73	228.291	85.3213	COL11A1
ENSSSCG00000006858	OLFM3	10.1579	1.81433	1.59051	OLFM3
ENSSSCG00000006861	EXTL2	10.8856	5.22087	3.4832	EXTL2
ENSSSCG00000006867	LRRC39	10.0396	26.8564	28.38	LRRC39
ENSSSCG00000006872	AGL	54.4585	135.444	107.44	AGL
ENSSSCG00000006875	PLPPR4	7.09553	5.18347	1.13164	PLPPR4
ENSSSCG00000006876	PLPPR5	2.00503	0.592654	0.590415	PLPPR5
ENSSSCG00000006877	SNX7	15.2355	23.4953	16.1729	SNX7
ENSSSCG00000006887	CNN3	950.755	643.945	314.673	CNN3
ENSSSCG00000006888	SLC44A3	5.78155	1.70475	0.848241	SLC44A3
ENSSSCG00000006894	FNBP1L	76.9114	29.0353	25.0265	FNBP1L
ENSSSCG00000006897	CCDC18	6.09355	1.81557	1.89278	CCDC18
ENSSSCG00000006898	MTF2	12.0756	4.0157	3.45414	MTF2
ENSSSCG00000006912	HFM1	5.03146	1.71328	2.59037	HFM1
ENSSSCG00000006935	CLCA2	4.45693	6.38398	5.9608	CLCA2
ENSSSCG00000006948	MROH6	0.797239	0.894406	1.59586	MROH6
ENSSSCG00000006957	RHPN1	12.5104	2.1728	1.21863	RHPN1
ENSSSCG00000006979	MSR1	0.436422	1.21334	1.37169	MSR1
ENSSSCG00000006981	MICU3	18.5041	6.11604	5.08485	MICU3
ENSSSCG00000006988	PDGFRL	59.0518	82.1731	83.3085	PDGFRL
ENSSSCG00000007000	FAT1	40.9376	18.8857	12.6991	FAT1
ENSSSCG00000007001	protein_coding	8.02359	0.741695	0.557255	protein_coding
ENSSSCG00000007022	ANK1	1.38053	1.32589	2.78259	ANK1
ENSSSCG00000007026	VDAC3	131.941	201.562	339.018	VDAC3
ENSSSCG00000007027	SLC20A2	24.3355	35.9099	65.3021	SLC20A2
ENSSSCG00000007032	PLAT	58.292	16.2864	13.1183	PLAT
ENSSSCG00000007033	AP3M2	12.618	3.82506	2.33658	AP3M2
ENSSSCG00000007034	PSD3	15.3212	6.67406	3.63627	PSD3
ENSSSCG00000007052	FERMT1	9.20858	2.51159	1.91163	FERMT1
ENSSSCG00000007073	ISM1	15.1392	1.78405	4.1956	ISM1
ENSSSCG00000007079	FLRT3	20.0957	6.15108	4.26921	FLRT3
ENSSSCG00000007094	DZANK1	43.6251	7.18862	8.6068	DZANK1
ENSSSCG00000007112	PAX1	39.9276	14.4021	9.38155	PAX1
ENSSSCG00000007116	CD93	93.7648	138.656	216.409	CD93
ENSSSCG00000007130	SYNDIG1	7.68826	4.42165	1.1155	SYNDIG1
ENSSSCG00000007135	NINL	6.59838	2.55385	2.10437	NINL
ENSSSCG00000007139	ADRA1D	20.2824	29.2622	29.3119	ADRA1D
ENSSSCG00000007146	SIGLEC1	0.544531	1.0733	2.35551	SIGLEC1
ENSSSCG00000007173	IDH3B	87.3296	88.4505	154.377	IDH3B
ENSSSCG00000007199	SLC52A3	0.305646	0.394232	1.0599	SLC52A3
ENSSSCG00000007212	C20orf96	7.39899	3.58815	2.05923	C20orf96
ENSSSCG00000007231	MYLK2	23.965	107.296	200.38	MYLK2
ENSSSCG00000007232	DUSP15	21.5523	6.95124	10.0629	DUSP15
ENSSSCG00000007235	TPX2	91.447	35.1081	28.3215	TPX2
ENSSSCG00000007239	CCM2L	11.6655	14.0762	22.9251	CCM2L
ENSSSCG00000007240	HCK	3.24301	4.70089	5.29777	HCK
ENSSSCG00000007264	protein_coding	13.6079	34.5508	73.9274	protein_coding
ENSSSCG00000007285	GGT7	23.4832	5.92805	3.67725	GGT7
ENSSSCG00000007286	ACSS2	14.5991	17.6394	32.1924	ACSS2
ENSSSCG00000007308	ROMO1	331.797	443.237	478.711	ROMO1
ENSSSCG00000007314	EPB41L1	39.6497	11.5466	9.71537	EPB41L1
ENSSSCG00000007331	RBL1	21.361	8.75569	6.53426	RBL1
ENSSSCG00000007336	protein_coding	565.739	208.839	38.5156	protein_coding
ENSSSCG00000007350	PPP1R16B	11.978	10.4928	16.0281	PPP1R16B
ENSSSCG00000007351	FAM83D	8.08318	3.04579	2.55694	FAM83D
ENSSSCG00000007359	LPIN3	8.18675	11.5446	13.9445	LPIN3
ENSSSCG00000007369	protein_coding	214.417	556.383	529.261	protein_coding
ENSSSCG00000007373	GDAP1L1	8.13053	0.216844	0.374966	GDAP1L1
ENSSSCG00000007385	KCNS1	3.68622	5.80784	8.93234	KCNS1
ENSSSCG00000007391	MATN4	141.964	10.1849	34.1816	MATN4
ENSSSCG00000007423	UBE2C	271.971	132.006	86.4877	UBE2C
ENSSSCG00000007424	TNNC2	789.056	6266.11	9500.31	TNNC2
ENSSSCG00000007430	NEURL2	4.20498	14.5475	14.4668	NEURL2
ENSSSCG00000007431	CTSA	26.0782	30.5189	38.3113	CTSA
ENSSSCG00000007439	CDH22	4.76186	7.74837	1.87933	CDH22
ENSSSCG00000007453	EYA2	30.8725	7.86499	6.17181	EYA2
ENSSSCG00000007456	SULF2	181.42	42.0194	50.159	SULF2
ENSSSCG00000007482	pseudogene	42.2041	14.478	8.73339	pseudogene
ENSSSCG00000007485	BCAS1	3.22816	3.6134	4.29469	BCAS1
ENSSSCG00000007488	DOK5	6.67508	4.94656	12.573	DOK5
ENSSSCG00000007501	BMP7	33.1537	11.3014	7.80175	BMP7
ENSSSCG00000007504	RBM38	31.8119	46.8536	86.3182	RBM38
ENSSSCG00000007508	ZBP1	0.558145	4.324	10.4058	ZBP1
ENSSSCG00000007515	APCDD1L	79.2018	0.378932	1.60022	APCDD1L
ENSSSCG00000007517	NPEPL1	0.179599	0.1548	0.318511	NPEPL1
ENSSSCG00000007522	CTSZ	100.782	117.164	139.278	CTSZ
ENSSSCG00000007524	protein_coding	111.279	167.667	224.967	protein_coding
ENSSSCG00000007527	protein_coding	33.6565	13.9943	9.06849	protein_coding
ENSSSCG00000007528	PHACTR3	10.1367	9.40204	3.83324	PHACTR3
ENSSSCG00000007539	RBBP8NL	2.82354	1.21652	0.795922	RBBP8NL
ENSSSCG00000007542	PRKAR1B	26.7491	9.78924	8.00375	PRKAR1B
ENSSSCG00000007549	CYP2W1	35.2502	2.61344	0.634581	CYP2W1
ENSSSCG00000007559	MAFK	62.2392	71.8449	86.3678	MAFK
ENSSSCG00000007569	GRIFIN	18.6514	66.0576	33.4278	GRIFIN
ENSSSCG00000007574	SDK1	52.5167	10.9148	8.43846	SDK1
ENSSSCG00000007575	RADIL	12.7743	15.3102	17.3902	RADIL
ENSSSCG00000007578	protein_coding	4.1602	0.698048	0.44136	protein_coding
ENSSSCG00000007602	BAIAP2L1	3.83141	0.659399	0.687733	BAIAP2L1
ENSSSCG00000007649	GPC2	50.0992	6.21865	4.07172	GPC2
ENSSSCG00000007650	STAG3	2.00489	0.448981	0.476356	STAG3
ENSSSCG00000007671	TFR2	8.73418	1.3697	0.93886	TFR2
ENSSSCG00000007678	COL26A1	487.284	10.0187	3.20667	COL26A1
ENSSSCG00000007680	MYL10	0.0522723	6.0679	18.3449	MYL10
ENSSSCG00000007710	MLXIPL	1.2791	0.596963	2.98696	MLXIPL
ENSSSCG00000007718	CLDN4	13.9007	1.03327	10.6834	CLDN4
ENSSSCG00000007722	NCF1	2.32426	3.16365	3.09826	NCF1
ENSSSCG00000007727	AUTS2	91.6416	37.7012	29.2352	AUTS2
ENSSSCG00000007744	PHKG1	3.67386	26.6735	41.4947	PHKG1
ENSSSCG00000007757	TRIM72	53.0649	130.266	115.274	TRIM72
ENSSSCG00000007763	BCKDK	27.9112	32.5642	42.3196	BCKDK
ENSSSCG00000007772	STX1A	12.7962	2.53013	2.2276	STX1A
ENSSSCG00000007774	CTF1	9.74521	24.9232	35.9298	CTF1
ENSSSCG00000007799	MYLPF	2622.3	10409.4	14652.8	MYLPF
ENSSSCG00000007803	TUFM	137.706	143.599	188.269	TUFM
ENSSSCG00000007804	SH2B1	92.6985	118.191	140.833	SH2B1
ENSSSCG00000007805	ATP2A1	62.6332	341.094	1088.11	ATP2A1
ENSSSCG00000007816	IL21R	0.704037	2.87369	3.11572	IL21R
ENSSSCG00000007817	IL4R	12.4829	16.6298	22.1762	IL4R
ENSSSCG00000007823	ZKSCAN2	11.1948	4.08662	3.03056	ZKSCAN2
ENSSSCG00000007845	UQCRC2	90.7266	84.4361	136.013	UQCRC2
ENSSSCG00000007873	pseudogene	3.50214	0.246583	0.493983	pseudogene
ENSSSCG00000007874	ABCC1	16.5647	7.18437	18.043	ABCC1
ENSSSCG00000007901	CIITA	6.81368	10.0883	12.0887	CIITA
ENSSSCG00000007909	ABAT	20.6409	2.00021	0.921948	ABAT
ENSSSCG00000007926	SEC14L5	0.853579	0.318483	11.2906	SEC14L5
ENSSSCG00000007927	PPL	5.24745	4.306	7.3563	PPL
ENSSSCG00000007941	CDIP1	45.814	57.619	69.8512	CDIP1
ENSSSCG00000007947	PAM16	69.1294	87.4796	166.425	PAM16
ENSSSCG00000007949	SRL	335.505	881.753	890.79	SRL
ENSSSCG00000007977	HBM	22.4686	5.76255	14.0622	HBM
ENSSSCG00000007978	protein_coding	384.085	74.8672	134.702	protein_coding
ENSSSCG00000007992	PIGQ	20.4768	23.7164	29.5387	PIGQ
ENSSSCG00000007995	MCRIP2	24.8228	50.8355	170.598	MCRIP2
ENSSSCG00000008006	FBXL16	19.6263	5.94617	6.51155	FBXL16
ENSSSCG00000008012	protein_coding	16.1024	21.7392	21.6179	protein_coding
ENSSSCG00000008013	IGFALS	21.7327	28.6376	35.136	IGFALS
ENSSSCG00000008021	TMEM204	47.035	47.1277	81.1438	TMEM204
ENSSSCG00000008029	BAIAP3	5.47427	2.19777	1.64747	BAIAP3
ENSSSCG00000008038	SLC9A3R2	127.48	171.656	300.024	SLC9A3R2
ENSSSCG00000008073	OMD	18.3808	1.59045	2.68876	OMD
ENSSSCG00000008077	CARD19	29.4019	35.7691	56.9158	CARD19
ENSSSCG00000008119	KCNIP3	7.10602	5.88596	14.8638	KCNIP3
ENSSSCG00000008121	protein_coding	0.318945	0.704126	1.80414	protein_coding
ENSSSCG00000008122	ADRA2B	8.03872	6.59525	10.955	ADRA2B
ENSSSCG00000008123	ARID5A	18.9604	28.2274	23.555	ARID5A
ENSSSCG00000008134	EDAR	6.88139	1.25481	1.08153	EDAR
ENSSSCG00000008141	ST6GAL2	44.1284	11.9486	3.35528	ST6GAL2
ENSSSCG00000008150	TMEM182	26.4156	90.3186	92.2856	TMEM182
ENSSSCG00000008169	TBC1D8	20.7437	35.0479	29.0792	TBC1D8
ENSSSCG00000008194	ACTR1B	50.1546	61.2218	70.9832	ACTR1B
ENSSSCG00000008195	COX5B	321.757	381.157	572.727	COX5B
ENSSSCG00000008200	ANKRD23	2.09377	7.78425	56.0716	ANKRD23
ENSSSCG00000008215	SMYD1	136.717	219.96	130.101	SMYD1
ENSSSCG00000008232	RNF181	27.8269	33.7555	39.662	RNF181
ENSSSCG00000008237	RETSAT	26.263	26.4743	44.0363	RETSAT
ENSSSCG00000008247	SUCLG1	34.3873	47.5964	62.1857	SUCLG1
ENSSSCG00000008259	LRRTM4	6.6759	1.55394	0.713508	LRRTM4
ENSSSCG00000008262	SEMA4F	26.5991	6.81401	5.10835	SEMA4F
ENSSSCG00000008282	WDR54	19.6593	10.4852	6.31712	WDR54
ENSSSCG00000008304	PRADC1	15.629	22.1328	28.4607	PRADC1
ENSSSCG00000008305	SMYD5	12.4867	23.748	23.8402	SMYD5
ENSSSCG00000008312	DYSF	56.1684	146.779	124.63	DYSF
ENSSSCG00000008335	protein_coding	32.8321	12.2477	9.93317	protein_coding
ENSSSCG00000008337	AAK1	27.3271	11.5582	8.7841	AAK1
ENSSSCG00000008339	GFPT1	30.9711	14.4762	9.33672	GFPT1
ENSSSCG00000008344	ARHGAP25	4.12266	5.56275	9.02461	ARHGAP25
ENSSSCG00000008349	CNRIP1	60.424	83.5741	83.8424	CNRIP1
ENSSSCG00000008374	B3GNT2	6.59128	1.95849	1.48371	B3GNT2
ENSSSCG00000008382	USP34	25.7851	12.4413	8.44209	USP34
ENSSSCG00000008386	KIAA1841	12.8004	2.93816	2.79229	KIAA1841
ENSSSCG00000008392	BCL11A	19.9304	1.20887	0.910877	BCL11A
ENSSSCG00000008406	CCDC88A	37.8474	14.4404	9.65006	CCDC88A
ENSSSCG00000008413	GPR75	11.2447	17.3299	10.3389	GPR75
ENSSSCG00000008427	KCNK12	2.63205	3.58433	4.23658	KCNK12
ENSSSCG00000008429	EPCAM	3.05186	0.861957	0.467401	EPCAM
ENSSSCG00000008443	EPAS1	39.2716	60.7356	99.6442	EPAS1
ENSSSCG00000008467	EML4	62.8759	19.8016	14.0092	EML4
ENSSSCG00000008479	DHX57	20.6023	8.82225	5.87475	DHX57
ENSSSCG00000008491	QPCT	3.99861	8.46667	8.43642	QPCT
ENSSSCG00000008501	VIT	5.47774	9.64367	8.65629	VIT
ENSSSCG00000008503	FEZ2	12.6328	35.903	48.6707	FEZ2
ENSSSCG00000008509	RASGRP3	11.1478	12.2409	18.1668	RASGRP3
ENSSSCG00000008533	protein_coding	3.02856	0.504756	0.46461	protein_coding
ENSSSCG00000008535	CLIP4	1.52609	2.8846	5.67863	CLIP4
ENSSSCG00000008560	DPYSL5	86.2077	92.5685	10.3055	DPYSL5
ENSSSCG00000008563	KCNK3	6.43905	0.516068	1.24612	KCNK3
ENSSSCG00000008568	DRC1	6.0913	14.1936	7.88647	DRC1
ENSSSCG00000008569	HADHB	46.6854	46.1135	79.7301	HADHB
ENSSSCG00000008570	ADGRF3	0.407712	0.640035	1.02629	ADGRF3
ENSSSCG00000008571	HADHA	105.053	124.13	175.231	HADHA
ENSSSCG00000008574	KIF3C	30.2318	9.65564	11.6398	KIF3C
ENSSSCG00000008586	TP53I3	15.1429	5.18039	4.10548	TP53I3
ENSSSCG00000008591	ATAD2B	16.3703	7.17771	5.42465	ATAD2B
ENSSSCG00000008601	SDC1	127.409	70.9336	28.8079	SDC1
ENSSSCG00000008604	WDR35	17.4448	5.85395	4.84963	WDR35
ENSSSCG00000008606	OSR1	25.4955	6.0258	4.9021	OSR1
ENSSSCG00000008613	GEN1	8.31591	2.21615	1.75203	GEN1
ENSSSCG00000008647	CMPK2	4.43252	3.49747	6.38136	CMPK2
ENSSSCG00000008649	SOX11	163.326	115.949	48.8367	SOX11
ENSSSCG00000008664	LRATD1	34.3652	4.3242	1.07728	LRATD1
ENSSSCG00000008684	POLN	1.2233	0.267147	0.675006	POLN
ENSSSCG00000008686	protein_coding	13.3493	6.58622	4.32079	protein_coding
ENSSSCG00000008687	MXD4	142.692	216.153	179.709	MXD4
ENSSSCG00000008689	ZFYVE28	5.23467	6.76579	17.2504	ZFYVE28
ENSSSCG00000008702	DOK7	25.1555	40.1645	46.1328	DOK7
ENSSSCG00000008703	ADRA2C	5.31331	12.3078	30.3718	ADRA2C
ENSSSCG00000008721	ABLIM2	18.2504	26.2645	131.525	ABLIM2
ENSSSCG00000008723	HTRA3	240.716	661.163	348.517	HTRA3
ENSSSCG00000008727	MSX1	11.1619	10.322	19.4798	MSX1
ENSSSCG00000008737	C1QTNF7	23.2748	8.36475	6.66062	C1QTNF7
ENSSSCG00000008742	CD38	4.78248	0.908007	0.619294	CD38
ENSSSCG00000008747	NCAPG	10.9839	3.91968	3.50232	NCAPG
ENSSSCG00000008749	SLIT2	55.4854	6.00944	5.50305	SLIT2
ENSSSCG00000008765	PCDH7	46.199	21.2406	11.1049	PCDH7
ENSSSCG00000008767	protein_coding	4.37984	6.97082	7.44427	protein_coding
ENSSSCG00000008771	C4orf19	6.56449	2.41479	1.54683	C4orf19
ENSSSCG00000008772	RELL1	21.313	27.9477	34.797	RELL1
ENSSSCG00000008787	KLHL5	14.9862	7.03615	4.84027	KLHL5
ENSSSCG00000008803	ATP8A1	9.50368	2.78959	2.22398	ATP8A1
ENSSSCG00000008820	TEC	5.92836	2.74246	1.90561	TEC
ENSSSCG00000008834	SPATA18	3.24555	1.37344	0.998642	SPATA18
ENSSSCG00000008835	RASL11B	75.6886	32.0339	15.8526	RASL11B
ENSSSCG00000008838	LNX1	2.16757	0.695941	0.500086	LNX1
ENSSSCG00000008844	KDR	73.9813	88.3832	109.696	KDR
ENSSSCG00000008852	MAP9	3.70665	0.942192	0.571454	MAP9
ENSSSCG00000008853	TLL1	7.47839	1.42415	1.23836	TLL1
ENSSSCG00000008854	CPE	423.253	150.613	86.2285	CPE
ENSSSCG00000008857	MSMO1	65.6387	32.9856	17.5873	MSMO1
ENSSSCG00000008860	protein_coding	10.5677	17.5559	13.9607	protein_coding
ENSSSCG00000008870	GUCY1B1	13.2106	14.0685	19.1254	GUCY1B1
ENSSSCG00000008875	RXFP1	0.87714	4.88382	4.02034	RXFP1
ENSSSCG00000008877	ETFDH	21.4685	25.6521	47.8921	ETFDH
ENSSSCG00000008898	protein_coding	7.03498	17.1416	13.1568	protein_coding
ENSSSCG00000008899	ARL9	24.8123	15.0443	7.05087	ARL9
ENSSSCG00000008901	PAICS	88.6138	40.791	27.2848	PAICS
ENSSSCG00000008902	PPAT	10.2927	3.40802	1.84045	PPAT
ENSSSCG00000008903	CRACD	50.5033	14.6622	8.80621	CRACD
ENSSSCG00000008913	IGFBP7	74.1169	156.08	272.185	IGFBP7
ENSSSCG00000008919	EPHA5	3.08084	0.983246	0.438538	EPHA5
ENSSSCG00000008943	SLC4A4	10.8757	5.41036	3.30537	SLC4A4
ENSSSCG00000008948	ALB	2.97382	1.70466	0.932641	ALB
ENSSSCG00000008961	MTHFD2L	2.22824	0.632427	0.5428	MTHFD2L
ENSSSCG00000008965	protein_coding	1.38223	2.02533	4.99491	protein_coding
ENSSSCG00000008970	CDKL2	4.26237	0.428605	0.196278	CDKL2
ENSSSCG00000008976	ART3	0.844394	18.0403	119.307	ART3
ENSSSCG00000008981	protein_coding	23.8149	106.999	110.054	protein_coding
ENSSSCG00000008984	protein_coding	87.8209	34.8432	17.4109	protein_coding
ENSSSCG00000008985	SOWAHB	2.24012	0.762779	1.4559	SOWAHB
ENSSSCG00000008991	FRAS1	26.1284	7.50151	11.0563	FRAS1
ENSSSCG00000008994	RBM46	4.00717	1.28039	0.315613	RBM46
ENSSSCG00000009004	SFRP2	1405.85	884.877	327.766	SFRP2
ENSSSCG00000009012	TMEM154	3.35909	1.08988	1.58435	TMEM154
ENSSSCG00000009018	SH3D19	10.4995	18.0589	13.68	SH3D19
ENSSSCG00000009023	DCLK2	19.4425	4.89545	4.09349	DCLK2
ENSSSCG00000009029	ARHGAP10	43.4834	89.4964	97.9568	ARHGAP10
ENSSSCG00000009031	EDNRA	37.133	9.90489	7.91969	EDNRA
ENSSSCG00000009045	HHIP	14.5015	1.65815	2.51943	HHIP
ENSSSCG00000009050	INPP4B	20.2462	8.43817	6.44737	INPP4B
ENSSSCG00000009062	MGARP	36.6781	35.8064	50.2955	MGARP
ENSSSCG00000009069	C4orf33	1.93096	1.74831	2.58562	C4orf33
ENSSSCG00000009077	PLK4	7.47512	2.71938	2.06332	PLK4
ENSSSCG00000009079	INTU	5.7676	1.31329	1.0906	INTU
ENSSSCG00000009092	TRPC3	1.58963	0.365246	0.420705	TRPC3
ENSSSCG00000009111	SYNPO2	22.0951	52.0955	68.9367	SYNPO2
ENSSSCG00000009114	PRSS12	90.8039	18.0125	12.9168	PRSS12
ENSSSCG00000009120	ZGRF1	6.66351	2.23584	1.505	ZGRF1
ENSSSCG00000009122	ARSJ	32.756	13.8772	8.03085	ARSJ
ENSSSCG00000009132	ENPEP	9.06366	3.49885	12.1878	ENPEP
ENSSSCG00000009134	EGF	0.900753	15.8733	24.6575	EGF
ENSSSCG00000009148	LEF1	17.2295	3.17012	1.03306	LEF1
ENSSSCG00000009150	HADH	52.7422	64.3725	83.0391	HADH
ENSSSCG00000009152	SGMS2	7.46767	1.63039	1.4048	SGMS2
ENSSSCG00000009179	MTTP	0.425087	0.850593	0.432243	MTTP
ENSSSCG00000009192	PDLIM5	24.1399	86.7337	113.595	PDLIM5
ENSSSCG00000009193	SMARCAD1	32.8122	12.7324	9.69445	SMARCAD1
ENSSSCG00000009197	GRID2	9.94918	1.90439	0.685387	GRID2
ENSSSCG00000009202	MMRN1	9.00245	2.55658	7.15723	MMRN1
ENSSSCG00000009203	SNCA	14.9059	2.66388	4.74233	SNCA
ENSSSCG00000009209	NAP1L5	50.0888	15.8385	9.8915	NAP1L5
ENSSSCG00000009220	DMP1	4.24333	1.17229	2.26761	DMP1
ENSSSCG00000009222	SPARCL1	401.654	445.412	620.092	SPARCL1
ENSSSCG00000009226	KLHL8	18.0076	10.6468	5.8658	KLHL8
ENSSSCG00000009228	MAPK10	3.57452	0.917961	0.721483	MAPK10
ENSSSCG00000009231	CDS1	2.71316	0.90106	0.662631	CDS1
ENSSSCG00000009233	GPAT3	31.1674	32.9332	43.081	GPAT3
ENSSSCG00000009237	HPSE	2.34928	0.628152	0.605027	HPSE
ENSSSCG00000009250	PRKG2	9.99557	1.08919	0.518428	PRKG2
ENSSSCG00000009259	PAQR3	21.053	7.1668	5.90418	PAQR3
ENSSSCG00000009281	protein_coding	80.7533	214.602	263.449	protein_coding
ENSSSCG00000009285	protein_coding	5.93495	9.51168	34.3884	protein_coding
ENSSSCG00000009320	FLT1	11.5195	15.086	23.5695	FLT1
ENSSSCG00000009331	MEDAG	13.4749	22.7214	17.025	MEDAG
ENSSSCG00000009334	HSPH1	84.7368	24.444	15.7675	HSPH1
ENSSSCG00000009357	SMAD9	21.9582	7.81017	4.17235	SMAD9
ENSSSCG00000009361	POSTN	755.632	1199.54	593.336	POSTN
ENSSSCG00000009364	FREM2	16.4372	18.676	22.8838	FREM2
ENSSSCG00000009377	THSD1	34.303	43.9865	58.4445	THSD1
ENSSSCG00000009378	CKAP2	50.7263	20.6643	15.5371	CKAP2
ENSSSCG00000009397	CAB39L	15.615	5.91289	4.80225	CAB39L
ENSSSCG00000009399	CYSLTR2	2.11004	5.61197	12.4915	CYSLTR2
ENSSSCG00000009403	ITM2B	415.769	472.656	626.249	ITM2B
ENSSSCG00000009405	SUCLA2	38.9913	37.19	65.7718	SUCLA2
ENSSSCG00000009410	RUBCNL	5.27296	7.53447	12.077	RUBCNL
ENSSSCG00000009430	AKAP11	65.5275	37.8879	20.3416	AKAP11
ENSSSCG00000009431	DGKH	5.24385	1.65128	1.84019	DGKH
ENSSSCG00000009442	CNMD	356.011	2.97542	2.26661	CNMD
ENSSSCG00000009445	PCDH8	9.43906	1.07604	0.265282	PCDH8
ENSSSCG00000009448	DIAPH3	9.78426	3.59803	2.19618	DIAPH3
ENSSSCG00000009457	DACH1	4.93706	2.89121	5.72854	DACH1
ENSSSCG00000009468	KCTD12	179.358	98.9011	56.773	KCTD12
ENSSSCG00000009473	MYCBP2	20.1215	7.7259	6.56921	MYCBP2
ENSSSCG00000009475	SLAIN1	12.0322	1.33784	0.935483	SLAIN1
ENSSSCG00000009485	SLITRK1	4.84429	1.93558	0.508023	SLITRK1
ENSSSCG00000009488	SLITRK5	23.0069	7.36193	8.55511	SLITRK5
ENSSSCG00000009489	GPC6	102.675	31.5436	18.8897	GPC6
ENSSSCG00000009490	DCT	17.7226	1.61352	0.606508	DCT
ENSSSCG00000009501	protein_coding	264.629	103.039	61.3992	protein_coding
ENSSSCG00000009502	UGGT2	13.6464	5.97121	4.56841	UGGT2
ENSSSCG00000009503	HS6ST3	6.42761	0.926618	0.0240636	HS6ST3
ENSSSCG00000009520	ZIC2	12.7405	0.776241	1.0457	ZIC2
ENSSSCG00000009530	protein_coding	0.718751	0.331726	0.182295	protein_coding
ENSSSCG00000009535	EFNB2	104.042	28.917	39.2434	EFNB2
ENSSSCG00000009543	protein_coding	6.54029	9.25609	6.65812	protein_coding
ENSSSCG00000009545	COL4A2	1046.92	1369.26	1839.54	COL4A2
ENSSSCG00000009554	GRTP1	45.4792	70.7431	48.3216	GRTP1
ENSSSCG00000009580	S1PR3	77.8763	15.8085	12.9849	S1PR3
ENSSSCG00000009584	SEMA4D	6.06826	10.6409	18.3147	SEMA4D
ENSSSCG00000009593	ROR2	130.817	61.1841	28.5585	ROR2
ENSSSCG00000009595	protein_coding	5.55778	1.51198	0.608248	protein_coding
ENSSSCG00000009613	DMTN	10.8449	1.17455	3.63431	DMTN
ENSSSCG00000009616	HR	1.9065	12.3954	11.474	HR
ENSSSCG00000009619	SFTPC	15.6191	2.34852	2.15178	SFTPC
ENSSSCG00000009621	PHYHIP	4.40767	0.692327	0.47158	PHYHIP
ENSSSCG00000009631	PEBP4	2.72563	28.2609	98.5224	PEBP4
ENSSSCG00000009642	STC1	9.47634	2.22492	3.3767	STC1
ENSSSCG00000009648	protein_coding	94.5175	0.911155	1.34736	protein_coding
ENSSSCG00000009649	NEFL	121.701	3.2489	1.05961	NEFL
ENSSSCG00000009650	DOCK5	13.5723	2.16224	1.81377	DOCK5
ENSSSCG00000009653	CDCA2	15.6482	5.36101	3.38858	CDCA2
ENSSSCG00000009664	PTK2B	2.04064	4.11231	6.00126	PTK2B
ENSSSCG00000009668	CLU	76.4937	16.9845	71.0329	CLU
ENSSSCG00000009679	FZD3	5.95007	0.631786	0.389102	FZD3
ENSSSCG00000009682	HMBOX1	13.2863	4.45673	3.3738	HMBOX1
ENSSSCG00000009693	XKR6	3.33727	1.31229	0.925213	XKR6
ENSSSCG00000009714	NEK1	22.9302	9.56993	7.33609	NEK1
ENSSSCG00000009720	DDX60	3.60075	0.635491	0.778013	DDX60
ENSSSCG00000009722	SPOCK3	44.3267	19.1595	4.64352	SPOCK3
ENSSSCG00000009748	RIMBP2	5.01562	1.5775	1.06356	RIMBP2
ENSSSCG00000009753	TMEM132C	49.3558	2.76373	0.752252	TMEM132C
ENSSSCG00000009759	SCARB1	23.6595	34.0997	51.7127	SCARB1
ENSSSCG00000009764	CCDC92	18.6649	6.85364	5.7593	CCDC92
ENSSSCG00000009765	DNAH10	6.49875	2.26938	2.34289	DNAH10
ENSSSCG00000009781	PITPNM2	13.9983	13.4691	19.5226	PITPNM2
ENSSSCG00000009784	ABCB9	7.42061	2.46378	1.53198	ABCB9
ENSSSCG00000009808	TMEM120B	7.10249	15.4169	15.6975	TMEM120B
ENSSSCG00000009817	P2RX7	1.4373	1.47831	2.15933	P2RX7
ENSSSCG00000009824	RAD9B	1.26159	1.96482	3.09471	RAD9B
ENSSSCG00000009831	CUX2	12.8759	4.2142	3.25631	CUX2
ENSSSCG00000009833	SH2B3	24.0374	30.2629	33.0261	SH2B3
ENSSSCG00000009839	CIT	15.2701	5.51717	3.95616	CIT
ENSSSCG00000009842	CCDC60	2.41276	9.41642	12.6375	CCDC60
ENSSSCG00000009844	HSPB8	85.502	289.848	435.005	HSPB8
ENSSSCG00000009845	SRRM4	3.96697	0.307523	0.376566	SRRM4
ENSSSCG00000009862	RNFT2	19.5103	6.46141	4.45217	RNFT2
ENSSSCG00000009865	TBX3	43.9567	15.8584	14.1711	TBX3
ENSSSCG00000009880	SLC8B1	8.43687	7.84444	11.3361	SLC8B1
ENSSSCG00000009881	OAS2	6.585	8.40425	13.2135	OAS2
ENSSSCG00000009889	ALDH2	24.7453	52.2495	25.4139	ALDH2
ENSSSCG00000009896	BICDL1	2.77063	1.06513	0.529717	BICDL1
ENSSSCG00000009927	FAM222A	9.8142	3.19623	7.02324	FAM222A
ENSSSCG00000009929	TRPV4	14.1978	1.86222	2.4458	TRPV4
ENSSSCG00000009951	SGSM1	4.27174	0.685356	0.805664	SGSM1
ENSSSCG00000009957	MYO18B	34.1906	91.1417	92.0093	MYO18B
ENSSSCG00000009958	SEZ6L	22.5435	3.24913	1.37585	SEZ6L
ENSSSCG00000009959	ASPHD2	8.68307	2.23068	1.45413	ASPHD2
ENSSSCG00000009968	TTC28	38.8957	18.3096	11.5444	TTC28
ENSSSCG00000009972	KREMEN1	45.4429	50.4387	66.0957	KREMEN1
ENSSSCG00000009975	EMID1	28.6154	15.4632	8.30762	EMID1
ENSSSCG00000010006	protein_coding	2.36001	0.445986	0.210482	protein_coding
ENSSSCG00000010009	GAL3ST1	5.88363	0.99213	1.33186	GAL3ST1
ENSSSCG00000010011	TCN2	62.7747	64.2482	93.3399	TCN2
ENSSSCG00000010017	SMTN	67.9253	145.442	159.715	SMTN
ENSSSCG00000010026	PIK3IP1	6.20489	3.21937	6.14827	PIK3IP1
ENSSSCG00000010046	GNAZ	27.9559	3.35383	3.48626	GNAZ
ENSSSCG00000010048	RAB36	6.84089	2.06429	1.05213	RAB36
ENSSSCG00000010054	ADORA2A	29.7798	41.5812	51.0141	ADORA2A
ENSSSCG00000010055	GGT5	0.266865	0.222184	0.809663	GGT5
ENSSSCG00000010059	GUCD1	48.874	65.5707	72.4284	GUCD1
ENSSSCG00000010073	CHCHD10	8.00017	27.6855	76.3764	CHCHD10
ENSSSCG00000010077	protein_coding	10.784	9.34176	3.79803	protein_coding
ENSSSCG00000010084	protein_coding	9.98193	4.14699	2.381	protein_coding
ENSSSCG00000010086	protein_coding	5.49054	1.34473	0.730629	protein_coding
ENSSSCG00000010087	YDJC	26.6161	14.4957	7.00046	YDJC
ENSSSCG00000010089	protein_coding	1.73771	1.32694	0.589766	protein_coding
ENSSSCG00000010099	protein_coding	15.5295	13.1238	5.6038	protein_coding
ENSSSCG00000010101	P2RX6	10.836	24.4048	27.4375	P2RX6
ENSSSCG00000010128	protein_coding	58.4257	18.0175	12.3752	protein_coding
ENSSSCG00000010131	TXNRD2	6.80766	8.4385	9.07891	TXNRD2
ENSSSCG00000010132	COMT	21.5545	55.2988	55.4781	COMT
ENSSSCG00000010133	ARVCF	64.0225	54.8826	93.1026	ARVCF
ENSSSCG00000010134	TANGO2	15.3884	26.7502	23.5369	TANGO2
ENSSSCG00000010142	RYR2	4.13927	0.997911	0.423892	RYR2
ENSSSCG00000010144	ACTN2	194.124	564.877	772.388	ACTN2
ENSSSCG00000010163	KCNK1	8.67892	8.25048	3.12454	KCNK1
ENSSSCG00000010165	protein_coding	4.98928	0.884011	1.04588	protein_coding
ENSSSCG00000010181	C1orf198	209.153	75.6777	58.1172	C1orf198
ENSSSCG00000010184	AGT	0.897893	3.32312	4.18941	AGT
ENSSSCG00000010190	protein_coding	807.095	9533.28	16283.6	protein_coding
ENSSSCG00000010199	RET	19.0197	41.7085	42.4475	RET
ENSSSCG00000010201	RASGEF1A	0.927827	7.84904	5.24672	RASGEF1A
ENSSSCG00000010204	BICC1	29.5375	13.2389	9.59027	BICC1
ENSSSCG00000010214	CDK1	16.7191	7.37585	5.47595	CDK1
ENSSSCG00000010232	LRRTM3	3.68286	1.07822	0.62727	LRRTM3
ENSSSCG00000010240	DNA2	5.49395	1.70837	1.31841	DNA2
ENSSSCG00000010256	COL13A1	9.00658	1.26967	1.65965	COL13A1
ENSSSCG00000010278	CDH23	1.70753	1.74959	3.96611	CDH23
ENSSSCG00000010280	VSIR	11.2396	26.1907	39.9762	VSIR
ENSSSCG00000010283	SPOCK2	50.2998	16.7109	20.9889	SPOCK2
ENSSSCG00000010289	MICU1	47.4967	61.5714	69.923	MICU1
ENSSSCG00000010290	MCU	92.2421	128.672	126.26	MCU
ENSSSCG00000010298	CFAP70	0.967921	0.373699	0.300705	CFAP70
ENSSSCG00000010303	SYNPO2L	135.287	351.147	321.124	SYNPO2L
ENSSSCG00000010304	MYOZ1	27.309	700.521	1128.72	MYOZ1
ENSSSCG00000010312	PLAU	18.5631	48.921	27.4192	PLAU
ENSSSCG00000010315	ADK	5.52145	2.52335	1.81181	ADK
ENSSSCG00000010316	KAT6B	23.5537	8.20734	5.79488	KAT6B
ENSSSCG00000010317	DUSP29	12.2227	23.8958	13.5096	DUSP29
ENSSSCG00000010330	PPIF	7.27497	5.55927	15.7094	PPIF
ENSSSCG00000010331	ANXA11	88.5419	133.478	144.147	ANXA11
ENSSSCG00000010348	CDHR1	0.945156	2.23817	1.75108	CDHR1
ENSSSCG00000010352	GRID1	18.9001	8.22484	5.71002	GRID1
ENSSSCG00000010359	LDB3	8.36865	42.9166	76.2642	LDB3
ENSSSCG00000010376	GDF10	20.3426	1.92817	2.17026	GDF10
ENSSSCG00000010404	ALOX5	1.17588	2.93229	2.21597	ALOX5
ENSSSCG00000010428	DKK1	6.78884	0.688278	0.802738	DKK1
ENSSSCG00000010429	PRKG1	20.9412	15.263	6.52709	PRKG1
ENSSSCG00000010437	PAPSS2	31.0426	5.16809	2.51921	PAPSS2
ENSSSCG00000010448	protein_coding	0.294033	0.375772	0.553811	protein_coding
ENSSSCG00000010451	IFIT2	9.07241	3.01376	2.57258	IFIT2
ENSSSCG00000010455	SLC16A12	2.65957	0.890209	0.974958	SLC16A12
ENSSSCG00000010457	KIF20B	18.9156	7.06428	4.78146	KIF20B
ENSSSCG00000010459	HTR7	7.20346	2.75657	1.82453	HTR7
ENSSSCG00000010464	PPP1R3C	29.247	37.9045	118.546	PPP1R3C
ENSSSCG00000010471	KIF11	50.1804	17.9156	11.8674	KIF11
ENSSSCG00000010479	RBP4	10.8899	3.48006	4.09811	RBP4
ENSSSCG00000010486	HELLS	25.9443	8.2212	6.49165	HELLS
ENSSSCG00000010489	pseudogene	2.49481	3.15876	1.21018	pseudogene
ENSSSCG00000010493	PDLIM1	27.5548	58.0069	61.4538	PDLIM1
ENSSSCG00000010495	ALDH18A1	51.217	25.1201	14.9226	ALDH18A1
ENSSSCG00000010496	TCTN3	15.6014	7.27004	5.12862	TCTN3
ENSSSCG00000010504	BLNK	1.12585	1.45811	1.757	BLNK
ENSSSCG00000010507	TLL2	2.8985	0.372661	0.451876	TLL2
ENSSSCG00000010512	SLIT1	30.1761	1.72009	0.988849	SLIT1
ENSSSCG00000010517	protein_coding	177.799	73.5645	50.7819	protein_coding
ENSSSCG00000010521	UBTD1	68.2693	111.812	118.865	UBTD1
ENSSSCG00000010522	ANKRD2	3.11434	17.763	73.9839	ANKRD2
ENSSSCG00000010523	HOGA1	4.72931	11.844	14.3627	HOGA1
ENSSSCG00000010530	CRTAC1	8.37347	1.93944	1.74962	CRTAC1
ENSSSCG00000010533	PYROXD2	4.50552	5.9463	11.8913	PYROXD2
ENSSSCG00000010535	HPSE2	8.52454	2.15365	0.385476	HPSE2
ENSSSCG00000010536	CNNM1	2.24458	0.337558	0.288237	CNNM1
ENSSSCG00000010537	GOT1	37.4495	27.0588	60.9081	GOT1
ENSSSCG00000010540	ENTPD7	9.4475	4.36528	2.83213	ENTPD7
ENSSSCG00000010554	SCD	85.3629	17.1403	8.92581	SCD
ENSSSCG00000010559	protein_coding	3.81708	1.33671	0.91368	protein_coding
ENSSSCG00000010568	NPM3	81.7422	34.4869	16.6276	NPM3
ENSSSCG00000010570	KCNIP2	10.502	2.57512	2.98251	KCNIP2
ENSSSCG00000010571	ARMH3	32.4215	11.629	10.1956	ARMH3
ENSSSCG00000010573	HPS6	5.37564	10.9272	12.9289	HPS6
ENSSSCG00000010580	NFKB2	41.1032	52.5321	55.3004	NFKB2
ENSSSCG00000010581	PSD	31.7366	1.97736	1.02516	PSD
ENSSSCG00000010593	CNNM2	9.24139	3.19135	2.96613	CNNM2
ENSSSCG00000010603	NEURL1	60.7377	139.85	97.9175	NEURL1
ENSSSCG00000010607	COL17A1	3.86937	0.284292	0.427059	COL17A1
ENSSSCG00000010617	SORCS3	3.00239	0.528926	0.710085	SORCS3
ENSSSCG00000010629	ADRA2A	65.6578	34.5813	19.3287	ADRA2A
ENSSSCG00000010640	NRAP	5.72862	86.2817	125.105	NRAP
ENSSSCG00000010647	ADRB1	1.17743	3.2049	3.43771	ADRB1
ENSSSCG00000010649	VWA2	1.97854	1.0058	0.510083	VWA2
ENSSSCG00000010650	pseudogene	17.0101	43.746	50.3362	pseudogene
ENSSSCG00000010652	FAM160B1	32.6051	12.8361	10.2628	FAM160B1
ENSSSCG00000010654	ATRNL1	9.52133	2.43134	1.64646	ATRNL1
ENSSSCG00000010655	GFRA1	37.1749	10.1862	39.2686	GFRA1
ENSSSCG00000010665	SHTN1	6.39258	1.20154	0.578586	SHTN1
ENSSSCG00000010681	SFXN4	8.74965	10.7163	12.2348	SFXN4
ENSSSCG00000010686	BAG3	42.6968	60.1434	85.9823	BAG3
ENSSSCG00000010698	FGFR2	38.5524	1.04551	2.17169	FGFR2
ENSSSCG00000010732	FAM53B	21.8382	39.3626	40.4418	FAM53B
ENSSSCG00000010742	UROS	6.91087	8.57556	9.29723	UROS
ENSSSCG00000010757	EBF3	73.3115	24.6797	19.7885	EBF3
ENSSSCG00000010761	STK32C	13.2576	1.21184	1.1615	STK32C
ENSSSCG00000010764	LRRC27	3.58961	0.803134	0.406239	LRRC27
ENSSSCG00000010765	INPP5A	33.0083	36.5885	51.9601	INPP5A
ENSSSCG00000010768	CFAP46	4.94528	1.6791	1.68857	CFAP46
ENSSSCG00000010770	KNDC1	7.29909	0.820923	1.15995	KNDC1
ENSSSCG00000010774	ZNF511	57.8623	67.2091	81.6964	ZNF511
ENSSSCG00000010791	FUOM	17.666	18.8017	25.1016	FUOM
ENSSSCG00000010795	NDUFAB1	29.297	39.0324	66.1324	NDUFAB1
ENSSSCG00000010814	ESRRG	6.08254	2.45136	1.4804	ESRRG
ENSSSCG00000010826	MTARC2	13.3569	14.2528	40.2897	MTARC2
ENSSSCG00000010831	DUSP10	8.69408	14.2908	22.8322	DUSP10
ENSSSCG00000010840	RGS7	8.95854	1.57925	2.03336	RGS7
ENSSSCG00000010860	protein_coding	25.8395	48.6797	51.0804	protein_coding
ENSSSCG00000010861	COQ8A	37.2602	99.2995	308.592	COQ8A
ENSSSCG00000010865	EXO1	6.58474	2.90063	1.72164	EXO1
ENSSSCG00000010879	KIF26B	26.3082	0.61016	0.435186	KIF26B
ENSSSCG00000010896	ASPM	16.965	6.13282	3.81261	ASPM
ENSSSCG00000010908	PTPRC	0.988815	1.6929	2.24654	PTPRC
ENSSSCG00000010912	KIF14	17.1075	5.7776	4.76255	KIF14
ENSSSCG00000010925	PPP1R12B	57.0453	92.518	96.6395	PPP1R12B
ENSSSCG00000010926	SYT2	12.6384	11.8106	27.1932	SYT2
ENSSSCG00000010943	AOPEP	10.7758	8.46544	15.6348	AOPEP
ENSSSCG00000010947	FBP2	0	22.0979	43.1427	FBP2
ENSSSCG00000010948	CTSL	2.72713	3.86945	4.04019	CTSL
ENSSSCG00000010949	DAPK1	30.0226	9.46599	8.35162	DAPK1
ENSSSCG00000010957	AGTPBP1	11.2956	3.09081	3.72159	AGTPBP1
ENSSSCG00000010971	ARID3C	3.2759	0.493674	1.00338	ARID3C
ENSSSCG00000010980	C9orf24	5.6437	1.73875	0.968315	C9orf24
ENSSSCG00000010984	KIF24	24.4729	22.0097	3.58113	KIF24
ENSSSCG00000010987	UBAP2	67.0343	87.3518	89.9458	UBAP2
ENSSSCG00000011001	APTX	1.45375	0.707545	0.43617	APTX
ENSSSCG00000011003	NDUFB6	24.4918	25.711	41.7072	NDUFB6
ENSSSCG00000011014	BAMBI	29.5272	15.6341	7.5784	BAMBI
ENSSSCG00000011020	JCAD	32.6109	30.0943	44.0166	JCAD
ENSSSCG00000011023	ZNF438	7.59851	9.87603	14.0542	ZNF438
ENSSSCG00000011030	CUBN	2.03561	0.596604	0.192978	CUBN
ENSSSCG00000011033	VIM	3349.68	2666.25	1159.26	VIM
ENSSSCG00000011034	ST8SIA6	20.6087	2.60086	0.240136	ST8SIA6
ENSSSCG00000011040	CACNB2	2.23505	0.521128	0.682459	CACNB2
ENSSSCG00000011046	ITGA8	30.0798	3.31816	2.49899	ITGA8
ENSSSCG00000011048	SUV39H2	17.2458	7.33446	5.15605	SUV39H2
ENSSSCG00000011049	DCLRE1C	3.30925	1.17986	1.15167	DCLRE1C
ENSSSCG00000011065	MASTL	8.15339	3.28497	2.28033	MASTL
ENSSSCG00000011069	ARMC4	1.98482	0.564455	0.383029	ARMC4
ENSSSCG00000011076	OTUD1	44.7703	45.2405	90.3373	OTUD1
ENSSSCG00000011087	SKIDA1	13.6332	4.13518	2.16742	SKIDA1
ENSSSCG00000011106	CREM	18.0872	24.742	28.8481	CREM
ENSSSCG00000011110	CCDC3	151.422	43.4581	44.2165	CCDC3
ENSSSCG00000011111	CAMK1D	16.2673	5.0449	4.38876	CAMK1D
ENSSSCG00000011125	GATA3	6.94463	0.520755	1.50571	GATA3
ENSSSCG00000011129	ITIH5	36.1657	87.2524	135.739	ITIH5
ENSSSCG00000011131	PRKCQ	3.03937	4.61875	4.66463	PRKCQ
ENSSSCG00000011141	CALML5	9.60391	4.01275	9.11528	CALML5
ENSSSCG00000011147	AKR1C2	0.0154031	0.178145	0.723967	AKR1C2
ENSSSCG00000011158	PFKP	11.1113	17.2173	22.2268	PFKP
ENSSSCG00000011160	ADARB2	3.73356	0.809063	1.59505	ADARB2
ENSSSCG00000011162	protein_coding	23.7624	37.419	35.5995	protein_coding
ENSSSCG00000011168	ZNF510	3.21369	1.27629	1.02134	ZNF510
ENSSSCG00000011176	SUSD4	6.19959	2.14122	1.79389	SUSD4
ENSSSCG00000011198	RFTN1	14.625	12.5873	45.6132	RFTN1
ENSSSCG00000011201	SATB1	17.347	5.37888	4.04164	SATB1
ENSSSCG00000011207	SGO1	14.8798	5.61621	4.16003	SGO1
ENSSSCG00000011208	ZNF385D	31.3602	15.411	10.1347	ZNF385D
ENSSSCG00000011216	LRRC3B	17.5497	5.85909	7.34856	LRRC3B
ENSSSCG00000011218	SLC4A7	10.0298	5.16264	12.0915	SLC4A7
ENSSSCG00000011254	XYLB	3.27871	1.56494	0.918285	XYLB
ENSSSCG00000011259	SCN5A	3.12569	4.00782	1.80531	SCN5A
ENSSSCG00000011260	SCN10A	8.91576	1.65413	0.1917	SCN10A
ENSSSCG00000011278	TRAK1	23.6478	35.2113	45.4085	TRAK1
ENSSSCG00000011280	VIPR1	0.546124	0.604165	1.08981	VIPR1
ENSSSCG00000011286	KLHL40	44.596	105.549	83.9654	KLHL40
ENSSSCG00000011287	HHATL	0.503891	0.611879	1.88425	HHATL
ENSSSCG00000011298	CDCP1	2.77037	0.370146	0.370405	CDCP1
ENSSSCG00000011299	CLEC3B	26.3793	231.339	306.963	CLEC3B
ENSSSCG00000011309	KIF15	27.6458	10.3676	6.75725	KIF15
ENSSSCG00000011310	ZNF660	16.7367	6.09346	4.3967	ZNF660
ENSSSCG00000011317	FYCO1	17.4338	27.594	46.6791	FYCO1
ENSSSCG00000011322	CCR1	0.590777	1.4727	0.915914	CCR1
ENSSSCG00000011325	MYL3	106.247	194.432	117.352	MYL3
ENSSSCG00000011326	PTH1R	98.0966	29.0993	25.1387	PTH1R
ENSSSCG00000011340	SMARCC1	39.4447	19.2799	10.8884	SMARCC1
ENSSSCG00000011353	PFKFB4	7.15362	12.4955	21.3414	PFKFB4
ENSSSCG00000011355	protein_coding	11.5828	3.07389	5.45078	protein_coding
ENSSSCG00000011356	UQCRC1	142.87	123.659	217.411	UQCRC1
ENSSSCG00000011358	TREX1	1.73812	1.53865	3.40387	TREX1
ENSSSCG00000011360	CELSR3	6.31195	0.258905	0.135947	CELSR3
ENSSSCG00000011377	LAMB2	138.93	206.07	379.433	LAMB2
ENSSSCG00000011379	KLHDC8B	10.1811	23.2298	25.1229	KLHDC8B
ENSSSCG00000011384	BSN	7.39269	1.78098	1.73943	BSN
ENSSSCG00000011397	SLC38A3	0.930317	0.241501	3.58378	SLC38A3
ENSSSCG00000011398	SEMA3F	153.345	46.3094	48.5595	SEMA3F
ENSSSCG00000011400	SEMA3B	38.2655	55.5569	75.1932	SEMA3B
ENSSSCG00000011401	LSMEM2	9.32818	64.8851	111.407	LSMEM2
ENSSSCG00000011412	CACNA2D2	12.0404	1.89538	3.07964	CACNA2D2
ENSSSCG00000011415	MAPKAPK3	23.4015	47.6691	41.9369	MAPKAPK3
ENSSSCG00000011416	DOCK3	2.97633	0.559099	0.373263	DOCK3
ENSSSCG00000011435	TWF2	36.4273	41.5752	59.4069	TWF2
ENSSSCG00000011437	ALAS1	39.8231	40.0699	63.6687	ALAS1
ENSSSCG00000011439	PHF7	7.38462	2.99624	2.2161	PHF7
ENSSSCG00000011440	SEMA3G	41.3736	56.9827	58.5714	SEMA3G
ENSSSCG00000011441	TNNC1	1525.69	2641.27	1537.82	TNNC1
ENSSSCG00000011443	STAB1	25.6107	30.3968	35.4965	STAB1
ENSSSCG00000011444	NT5DC2	29.9634	18.6251	7.99837	NT5DC2
ENSSSCG00000011453	ITIH4	1.70396	3.76856	17.5179	ITIH4
ENSSSCG00000011455	CACNA1D	6.83314	2.20237	1.10122	CACNA1D
ENSSSCG00000011463	IL17RD	43.4666	21.7071	10.2747	IL17RD
ENSSSCG00000011477	ACOX2	2.7512	3.86832	7.66967	ACOX2
ENSSSCG00000011482	CFAP20DC	5.54602	1.7381	1.33611	CFAP20DC
ENSSSCG00000011495	PRICKLE2	29.2438	10.0126	5.14441	PRICKLE2
ENSSSCG00000011511	FRMD4B	24.4978	58.1945	72.8661	FRMD4B
ENSSSCG00000011519	GXYLT2	94.3789	46.2529	21.3673	GXYLT2
ENSSSCG00000011524	CHL1	12.2463	0.507198	1.24851	CHL1
ENSSSCG00000011527	CNTN4	14.2054	3.21946	1.82179	CNTN4
ENSSSCG00000011538	LMCD1	10.9323	15.2819	25.7495	LMCD1
ENSSSCG00000011557	CIDEC	3.88943	2.9764	26.2271	CIDEC
ENSSSCG00000011559	protein_coding	7.26667	23.7477	25.268	protein_coding
ENSSSCG00000011561	PRRT3	5.20278	1.94181	1.44831	PRRT3
ENSSSCG00000011563	FANCD2	17.6115	5.70618	4.14902	FANCD2
ENSSSCG00000011576	HRH1	0.965252	2.81024	4.3837	HRH1
ENSSSCG00000011577	SLC6A1	15.0689	2.14086	2.21086	SLC6A1
ENSSSCG00000011579	PPARG	3.36614	8.67741	14.0621	PPARG
ENSSSCG00000011582	CAND2	80.8267	143.431	114.545	CAND2
ENSSSCG00000011583	TMEM40	5.05241	15.5497	6.54993	TMEM40
ENSSSCG00000011592	PLXND1	119.626	126.937	185.371	PLXND1
ENSSSCG00000011599	GRIP2	3.04409	16.8713	28.6023	GRIP2
ENSSSCG00000011610	NUP210	7.54313	9.06066	11.2159	NUP210
ENSSSCG00000011618	GATA2	6.46712	4.74374	10.9067	GATA2
ENSSSCG00000011625	CHST13	9.71695	1.04973	1.34308	CHST13
ENSSSCG00000011630	ACKR4	0.462577	0.869318	4.91779	ACKR4
ENSSSCG00000011635	TMEM108	11.0558	1.2722	0.690276	TMEM108
ENSSSCG00000011646	KY	19.5664	64.162	38.4615	KY
ENSSSCG00000011666	CLSTN2	16.1493	5.38713	3.92227	CLSTN2
ENSSSCG00000011673	protein_coding	17.3984	26.7366	2.76738	protein_coding
ENSSSCG00000011680	PLS1	3.039	0.478073	0.510587	PLS1
ENSSSCG00000011683	PAQR9	16.427	2.36603	7.09703	PAQR9
ENSSSCG00000011689	PLOD2	73.9876	18.5033	14.2764	PLOD2
ENSSSCG00000011695	AGTR1	8.2734	14.9394	23.6976	AGTR1
ENSSSCG00000011698	GYG1	49.6587	48.4093	70.9192	GYG1
ENSSSCG00000011714	MED12L	2.30007	1.73665	0.677022	MED12L
ENSSSCG00000011717	IGSF10	14.2916	29.0785	10.171	IGSF10
ENSSSCG00000011723	MME	28.512	7.16879	13.1228	MME
ENSSSCG00000011727	PTX3	159.839	63.7929	28.8625	PTX3
ENSSSCG00000011729	protein_coding	37.1221	39.0373	52.2263	protein_coding
ENSSSCG00000011731	SMC4	37.5079	14.7445	11.0704	SMC4
ENSSSCG00000011736	SLITRK3	5.23466	3.15599	0.772085	SLITRK3
ENSSSCG00000011740	SERPINI1	5.57673	0.191672	0.61511	SERPINI1
ENSSSCG00000011747	CLDN11	39.3095	5.3321	6.88993	CLDN11
ENSSSCG00000011750	PLD1	9.67967	6.76492	3.15468	PLD1
ENSSSCG00000011756	NLGN1	5.19726	0.691631	0.138574	NLGN1
ENSSSCG00000011760	TBL1XR1	34.4417	18.7201	10.1102	TBL1XR1
ENSSSCG00000011764	NDUFB5	32.8559	34.2846	45.099	NDUFB5
ENSSSCG00000011765	USP13	11.9893	19.9348	31.6658	USP13
ENSSSCG00000011767	TTC14	19.1673	5.71432	6.43501	TTC14
ENSSSCG00000011768	CCDC39	11.7714	3.13732	3.79884	CCDC39
ENSSSCG00000011775	KLHL24	10.5307	11.8637	19.6752	KLHL24
ENSSSCG00000011791	MAP3K13	8.23652	3.53375	2.49944	MAP3K13
ENSSSCG00000011795	IGF2BP2	59.1344	18.6974	13.2958	IGF2BP2
ENSSSCG00000011810	BCL6	36.4334	15.0853	37.3632	BCL6
ENSSSCG00000011831	APOD	42.2551	18.8097	59.375	APOD
ENSSSCG00000011837	MELTF	19.7458	1.80313	0.250188	MELTF
ENSSSCG00000011848	TFRC	31.3755	10.2796	18.7023	TFRC
ENSSSCG00000011857	LMLN	3.16639	0.938847	0.981211	LMLN
ENSSSCG00000011872	SEMA5B	19.6566	7.29471	4.76521	SEMA5B
ENSSSCG00000011876	DTX3L	0.94112	1.01222	1.61409	DTX3L
ENSSSCG00000011877	CD86	0.678633	1.11072	0.821509	CD86
ENSSSCG00000011884	HCLS1	34.6799	21.6919	8.52223	HCLS1
ENSSSCG00000011885	FBXO40	0.509163	1.23353	1.37592	FBXO40
ENSSSCG00000011893	COX17	211.628	305.95	368.395	COX17
ENSSSCG00000011894	POPDC2	2.05582	18.0712	43.2899	POPDC2
ENSSSCG00000011903	B4GALT4	52.1863	22.1649	15.3859	B4GALT4
ENSSSCG00000011904	UPK1B	6.32299	0.794705	1.81341	UPK1B
ENSSSCG00000011906	IGSF11	7.66864	3.83806	1.68449	IGSF11
ENSSSCG00000011914	ZDHHC23	2.34584	1.18631	0.739198	ZDHHC23
ENSSSCG00000011915	GRAMD1C	7.07563	1.69515	1.23352	GRAMD1C
ENSSSCG00000011925	CD200R1	2.56953	3.87995	2.70926	CD200R1
ENSSSCG00000011943	BBX	21.3017	11.4347	6.72037	BBX
ENSSSCG00000011946	ALCAM	39.8743	4.19224	3.65045	ALCAM
ENSSSCG00000011951	NFKBIZ	2.50518	0.578609	1.0451	NFKBIZ
ENSSSCG00000011959	ABI3BP	61.9631	89.5875	49.6196	ABI3BP
ENSSSCG00000011964	LNP1	0.527506	12.9729	1.00604	LNP1
ENSSSCG00000011973	COL8A1	60.9559	9.36296	4.48445	COL8A1
ENSSSCG00000011977	DCBLD2	44.259	17.2654	10.3119	DCBLD2
ENSSSCG00000012001	ROBO1	61.0757	20.8823	8.95536	ROBO1
ENSSSCG00000012002	ROBO2	13.4074	2.36617	1.37404	ROBO2
ENSSSCG00000012007	HSPA13	79.3082	32.6409	18.5498	HSPA13
ENSSSCG00000012020	NCAM2	5.79221	0.453859	0.287496	NCAM2
ENSSSCG00000012027	ADAMTS5	14.7423	6.69964	4.66552	ADAMTS5
ENSSSCG00000012038	C21orf62	2.50355	9.26497	3.26846	C21orf62
ENSSSCG00000012042	ATP5PO	484.69	453.991	634.364	ATP5PO
ENSSSCG00000012046	protein_coding	22.0335	33.1774	38.9209	protein_coding
ENSSSCG00000012049	protein_coding	4.39897	9.18335	6.69956	protein_coding
ENSSSCG00000012053	CBR3	3.40689	14.9922	11.3669	CBR3
ENSSSCG00000012056	CHAF1B	29.2831	11.5549	9.03809	CHAF1B
ENSSSCG00000012062	TTC3	59.0821	17.5324	14.0421	TTC3
ENSSSCG00000012083	RIPK4	5.21296	0.774953	1.24802	RIPK4
ENSSSCG00000012101	protein_coding	36.8592	8.2001	5.02431	protein_coding
ENSSSCG00000012104	SHROOM2	25.7675	4.50128	4.70789	SHROOM2
ENSSSCG00000012110	MID1	48.8249	19.7531	7.09076	MID1
ENSSSCG00000012118	TLR8	0.330345	0.3489	0.504633	TLR8
ENSSSCG00000012121	EGFL6	223.898	173.529	77.2196	EGFL6
ENSSSCG00000012126	GPM6B	30.1666	7.3993	6.17404	GPM6B
ENSSSCG00000012130	FANCB	1.63567	0.430322	0.360907	FANCB
ENSSSCG00000012132	ASB9	34.5156	14.6288	7.02204	ASB9
ENSSSCG00000012134	PIGA	7.06939	2.29658	4.12706	PIGA
ENSSSCG00000012135	VEGFD	8.15985	15.1184	14.1197	VEGFD
ENSSSCG00000012137	BMX	0.461705	0.645411	0.806225	BMX
ENSSSCG00000012150	REPS2	14.5586	14.1199	5.48518	REPS2
ENSSSCG00000012151	NHS	5.91503	0.705381	0.435403	NHS
ENSSSCG00000012152	protein_coding	4.3692	1.44952	1.83478	protein_coding
ENSSSCG00000012153	RAI2	6.20482	10.4669	7.49885	RAI2
ENSSSCG00000012156	CDKL5	10.8159	3.7188	2.49935	CDKL5
ENSSSCG00000012161	MAP7D2	8.64665	0.481338	0.50195	MAP7D2
ENSSSCG00000012163	RPS6KA3	11.0794	12.2652	17.5011	RPS6KA3
ENSSSCG00000012164	CNKSR2	6.61347	4.08575	2.02444	CNKSR2
ENSSSCG00000012167	PHEX	14.4338	1.60066	1.0081	PHEX
ENSSSCG00000012182	PCYT1B	23.5311	11.3188	3.30261	PCYT1B
ENSSSCG00000012236	OTC	7.50753	9.45863	2.10037	OTC
ENSSSCG00000012253	CASK	60.3857	29.6762	17.5466	CASK
ENSSSCG00000012265	CHST7	22.3233	50.2567	42.966	CHST7
ENSSSCG00000012266	SLC9A7	8.44421	8.99492	4.19626	SLC9A7
ENSSSCG00000012275	ARAF	80.3626	150.78	164.426	ARAF
ENSSSCG00000012290	WDR45	40.8623	50.8353	59.7764	WDR45
ENSSSCG00000012292	SYP	42.3242	3.07573	2.12682	SYP
ENSSSCG00000012293	PRICKLE3	3.92437	5.93194	7.65635	PRICKLE3
ENSSSCG00000012294	PLP2	11.3509	33.3173	41.3339	PLP2
ENSSSCG00000012295	MAGIX	5.89861	14.0865	27.3712	MAGIX
ENSSSCG00000012305	USP27X	6.53848	2.23675	1.54655	USP27X
ENSSSCG00000012307	protein_coding	3.48218	1.25111	0.865648	protein_coding
ENSSSCG00000012324	IQSEC2	8.88024	13.378	10.3695	IQSEC2
ENSSSCG00000012332	WNK3	9.00494	3.06884	1.13863	WNK3
ENSSSCG00000012347	ALAS2	48.083	12.2338	21.0094	ALAS2
ENSSSCG00000012352	KLF8	3.34056	1.02473	0.389735	KLF8
ENSSSCG00000012363	HEPH	17.1731	1.18933	0.622897	HEPH
ENSSSCG00000012375	DLG3	13.218	1.50653	1.25058	DLG3
ENSSSCG00000012376	GDPD2	1.51917	1.6558	3.30662	GDPD2
ENSSSCG00000012377	KIF4A	19.627	6.95325	5.80755	KIF4A
ENSSSCG00000012386	FAM155B	17.9903	7.70707	4.27217	FAM155B
ENSSSCG00000012399	FOXO4	41.8893	65.6047	57.4236	FOXO4
ENSSSCG00000012409	CITED1	36.4215	92.8141	35.509	CITED1
ENSSSCG00000012415	NAP1L2	3.2337	0.366782	0.262412	NAP1L2
ENSSSCG00000012434	ATRX	33.3906	15.6931	10.5231	ATRX
ENSSSCG00000012437	ATP7A	10.1789	4.28444	3.00598	ATP7A
ENSSSCG00000012456	RPS6KA6	4.31813	1.81335	0.4835	RPS6KA6
ENSSSCG00000012482	SRPX2	41.1888	88.8303	54.3729	SRPX2
ENSSSCG00000012490	TMEM35A	28.5981	6.8812	4.74621	TMEM35A
ENSSSCG00000012504	pseudogene	80.6164	26.969	18.455	pseudogene
ENSSSCG00000012520	protein_coding	65.907	32.4296	17.9582	protein_coding
ENSSSCG00000012521	GPRASP2	25.0932	8.42014	6.85196	GPRASP2
ENSSSCG00000012525	BEX1	101.516	33.7118	26.4477	BEX1
ENSSSCG00000012528	BEX3	404.071	143.183	81.3749	BEX3
ENSSSCG00000012532	TCEAL1	12.7013	14.8651	17.2395	TCEAL1
ENSSSCG00000012536	PLP1	9.90962	3.1955	3.05638	PLP1
ENSSSCG00000012561	FRMPD3	10.7225	2.68144	1.90431	FRMPD3
ENSSSCG00000012564	MID2	9.48913	11.2678	13.487	MID2
ENSSSCG00000012569	ATG4A	9.27358	24.1895	31.6803	ATG4A
ENSSSCG00000012571	COL4A6	13.7513	2.32567	3.51268	COL4A6
ENSSSCG00000012572	COL4A5	15.1472	4.59642	6.07425	COL4A5
ENSSSCG00000012576	CHRDL1	15.2166	27.7764	33.6624	CHRDL1
ENSSSCG00000012584	CAPN6	380.743	657.504	284.139	CAPN6
ENSSSCG00000012585	DCX	49.5263	3.96005	0.498203	DCX
ENSSSCG00000012594	IL13RA2	1.12018	7.44324	14.9008	IL13RA2
ENSSSCG00000012595	LRCH2	18.7712	8.4407	5.76627	LRCH2
ENSSSCG00000012600	AGTR2	33.2987	34.2452	9.30267	AGTR2
ENSSSCG00000012606	ATP1B4	39.6553	116.789	147.205	ATP1B4
ENSSSCG00000012607	TMEM255A	19.4365	21.8507	7.90348	TMEM255A
ENSSSCG00000012625	PGRMC1	370.725	130.457	145.396	PGRMC1
ENSSSCG00000012633	IL13RA1	67.9825	113.443	127.181	IL13RA1
ENSSSCG00000012634	DOCK11	23.9405	15.552	7.22123	DOCK11
ENSSSCG00000012638	GRIA3	7.84654	2.55466	1.92742	GRIA3
ENSSSCG00000012644	TENM1	5.21391	2.60804	1.07486	TENM1
ENSSSCG00000012645	DCAF12L2	3.62547	5.44623	1.67307	DCAF12L2
ENSSSCG00000012647	PRR32	117.523	354.748	243.12	PRR32
ENSSSCG00000012651	XPNPEP2	2.03922	4.26282	3.71885	XPNPEP2
ENSSSCG00000012663	ENOX2	10.8808	5.84709	2.08504	ENOX2
ENSSSCG00000012667	IGSF1	22.9086	72.909	80.4831	IGSF1
ENSSSCG00000012669	protein_coding	95.4063	503.524	254.646	protein_coding
ENSSSCG00000012676	MBNL3	6.82342	3.09244	1.50929	MBNL3
ENSSSCG00000012693	protein_coding	3.80745	5.04422	5.08245	protein_coding
ENSSSCG00000012699	FHL1	81.4672	344.526	443.52	FHL1
ENSSSCG00000012705	ZIC3	8.25568	1.67413	1.51539	ZIC3
ENSSSCG00000012713	ATP11C	16.3254	6.30079	5.33063	ATP11C
ENSSSCG00000012724	SLITRK2	22.1486	2.29904	1.6383	SLITRK2
ENSSSCG00000012730	AFF2	10.2375	1.3452	1.26206	AFF2
ENSSSCG00000012754	GABRE	6.75619	1.57127	0.753992	GABRE
ENSSSCG00000012755	GABRQ	0.618357	2.34184	0.120789	GABRQ
ENSSSCG00000012759	ZNF185	39.3721	24.4859	12.9818	ZNF185
ENSSSCG00000012769	ATP2B3	2.96912	5.32602	9.65169	ATP2B3
ENSSSCG00000012771	SLC6A8	164.502	251.53	192.331	SLC6A8
ENSSSCG00000012783	IDH3G	41.7439	55.7204	70.4876	IDH3G
ENSSSCG00000012785	PDZD4	60.701	10.2748	4.10725	PDZD4
ENSSSCG00000012787	L1CAM	58.3684	7.92838	9.71656	L1CAM
ENSSSCG00000012789	AVPR2	0.25924	0.53267	1.61268	AVPR2
ENSSSCG00000012790	ARHGAP4	4.04874	7.65248	5.53909	ARHGAP4
ENSSSCG00000012792	RENBP	2.48351	4.2577	5.12398	RENBP
ENSSSCG00000012817	FUNDC2	22.2261	32.5558	45.3916	FUNDC2
ENSSSCG00000012818	F8	1.28809	4.81931	7.95534	F8
ENSSSCG00000012828	STARD8	11.7543	20.4873	27.662	STARD8
ENSSSCG00000012832	pseudogene	125.482	61.3504	27.8121	pseudogene
ENSSSCG00000012838	TSPAN4	21.991	11.4359	21.5362	TSPAN4
ENSSSCG00000012840	CD151	156.177	307.905	406.824	CD151
ENSSSCG00000012841	PNPLA2	52.6558	86.583	136.793	PNPLA2
ENSSSCG00000012845	CEND1	25.3607	2.74233	1.18622	CEND1
ENSSSCG00000012848	EPS8L2	12.3694	6.80756	0.558551	EPS8L2
ENSSSCG00000012854	RASSF7	9.06926	2.56533	1.92039	RASSF7
ENSSSCG00000012855	SLC22A18	7.30226	12.3284	5.67747	SLC22A18
ENSSSCG00000012893	UNC93B1	7.07061	8.60545	12.2918	UNC93B1
ENSSSCG00000012896	NDUFV1	46.4028	46.829	80.2242	NDUFV1
ENSSSCG00000012905	TMEM134	40.8897	100.484	124.324	TMEM134
ENSSSCG00000012909	PTPRCAP	8.83468	25.946	20.6651	PTPRCAP
ENSSSCG00000012911	CARNS1	7.51847	85.203	72.5975	CARNS1
ENSSSCG00000012915	protein_coding	10.0099	3.47905	4.16642	protein_coding
ENSSSCG00000012916	protein_coding	33.7305	50.1743	50.3323	protein_coding
ENSSSCG00000012960	CST6	11.8183	2.46616	2.09253	CST6
ENSSSCG00000012975	SNX32	6.08384	1.94428	2.15733	SNX32
ENSSSCG00000012978	AP5B1	3.01816	4.18193	5.22319	AP5B1
ENSSSCG00000012985	LTBP3	247.939	364.732	243.88	LTBP3
ENSSSCG00000012988	EHBP1L1	185.576	370.614	358.712	EHBP1L1
ENSSSCG00000012996	CDC42EP2	30.2504	59.387	72.9027	CDC42EP2
ENSSSCG00000013017	EHD1	183.106	350.792	260.403	EHD1
ENSSSCG00000013022	PYGM	193.796	372.548	488.419	PYGM
ENSSSCG00000013023	RASGRP2	8.74531	12.6375	14.9788	RASGRP2
ENSSSCG00000013028	ESRRA	4.97527	6.52007	13.3963	ESRRA
ENSSSCG00000013038	protein_coding	103.888	101.579	141.865	protein_coding
ENSSSCG00000013040	TRPT1	6.98667	6.4887	11.8702	TRPT1
ENSSSCG00000013041	FERMT3	2.92661	4.39098	4.24339	FERMT3
ENSSSCG00000013042	protein_coding	1.03234	1.64478	2.06565	protein_coding
ENSSSCG00000013043	MACROD1	53.0575	211.835	222.147	MACROD1
ENSSSCG00000013044	FLRT1	4.64567	1.95017	1.15335	FLRT1
ENSSSCG00000013061	EML3	30.4383	36.0176	44.7692	EML3
ENSSSCG00000013073	FADS3	49.1849	59.9438	81.3804	FADS3
ENSSSCG00000013074	RAB3IL1	32.8088	49.7106	43.9912	RAB3IL1
ENSSSCG00000013078	protein_coding	7.69748	3.36535	1.97066	protein_coding
ENSSSCG00000013086	CYB561A3	14.0947	12.7898	18.82	CYB561A3
ENSSSCG00000013088	LRRC10B	1.53088	3.53247	5.15148	LRRC10B
ENSSSCG00000013093	VWCE	18.1339	6.93226	5.35854	VWCE
ENSSSCG00000013100	protein_coding	0.813624	2.48549	3.57686	protein_coding
ENSSSCG00000013106	PTGDR2	0.248883	0.444303	0.670479	PTGDR2
ENSSSCG00000013110	TMEM109	193.17	291.041	293.523	TMEM109
ENSSSCG00000013114	SLC15A3	10.8097	19.3568	27.068	SLC15A3
ENSSSCG00000013119	STX3	2.60137	0.304909	0.312715	STX3
ENSSSCG00000013226	PTPMT1	23.816	28.133	49.3115	PTPMT1
ENSSSCG00000013230	FAM180B	2.13398	11.331	19.5516	FAM180B
ENSSSCG00000013235	MADD	1.65739	0.390547	0.716519	MADD
ENSSSCG00000013236	MYBPC3	1.23435	1.23678	0.398396	MYBPC3
ENSSSCG00000013237	SPI1	19.1061	28.2113	28.3987	SPI1
ENSSSCG00000013244	PACSIN3	66.1067	227.668	240.84	PACSIN3
ENSSSCG00000013246	C11orf49	7.48782	3.20002	2.17231	C11orf49
ENSSSCG00000013249	CKAP5	58.2392	25.173	18.9776	CKAP5
ENSSSCG00000013260	protein_coding	1707.92	886.152	516.974	protein_coding
ENSSSCG00000013266	LARGE2	12.3678	2.31163	1.72553	LARGE2
ENSSSCG00000013269	MAPK8IP1	170.826	161.691	74.8195	MAPK8IP1
ENSSSCG00000013270	CRY2	28.1817	37.8724	39.6789	CRY2
ENSSSCG00000013286	LRRC4C	7.254	1.2825	0.962474	LRRC4C
ENSSSCG00000013292	PRR5L	11.2929	11.8358	17.0886	PRR5L
ENSSSCG00000013296	SLC1A2	1.93902	0.258489	0.107283	SLC1A2
ENSSSCG00000013311	KIAA1549L	10.8765	2.89233	1.01684	KIAA1549L
ENSSSCG00000013327	MPPED2	36.0322	7.77556	5.61944	MPPED2
ENSSSCG00000013332	KIF18A	4.32066	1.27929	1.09971	KIF18A
ENSSSCG00000013333	BDNF	2.94557	1.23788	0.818602	BDNF
ENSSSCG00000013335	LGR4	107.908	33.5391	21.1248	LGR4
ENSSSCG00000013336	CCDC34	19.9118	6.89404	4.49644	CCDC34
ENSSSCG00000013339	ANO3	2.36476	0.641156	0.191495	ANO3
ENSSSCG00000013341	LUZP2	9.64083	1.49875	0.614721	LUZP2
ENSSSCG00000013349	HTATIP2	13.9438	4.91633	4.27333	HTATIP2
ENSSSCG00000013350	DBX1	8.27892	22.8923	21.3307	DBX1
ENSSSCG00000013354	CSRP3	138.577	1093.77	1674.78	CSRP3
ENSSSCG00000013375	MYOD1	43.2423	77.13	75.483	MYOD1
ENSSSCG00000013376	OTOG	0.605291	0.492821	0.21613	OTOG
ENSSSCG00000013382	PLEKHA7	4.39202	1.3702	1.6413	PLEKHA7
ENSSSCG00000013397	ARNTL	2.65217	2.63594	4.50193	ARNTL
ENSSSCG00000013401	DKK3	88.6109	57.6379	28.7185	DKK3
ENSSSCG00000013408	ADM	16.3339	30.9149	46.9105	ADM
ENSSSCG00000013418	CFD	18.8185	44.9034	141.539	CFD
ENSSSCG00000013433	ADAMTSL5	8.33236	12.4397	23.8768	ADAMTSL5
ENSSSCG00000013436	protein_coding	29.0475	38.627	75.2194	protein_coding
ENSSSCG00000013448	MKNK2	132.668	269.197	227.686	MKNK2
ENSSSCG00000013471	ZNF77	1.84588	0.41666	0.460162	ZNF77
ENSSSCG00000013497	ANKRD24	6.52381	7.48905	13.1906	ANKRD24
ENSSSCG00000013503	SHD	35.6597	1.2885	1.56107	SHD
ENSSSCG00000013510	UBXN6	122.146	196.78	183.385	UBXN6
ENSSSCG00000013513	PLIN5	1.14881	17.0871	33.4742	PLIN5
ENSSSCG00000013517	UHRF1	172.859	63.6962	44.0326	UHRF1
ENSSSCG00000013524	MICOS13	82.6036	96.565	116.193	MICOS13
ENSSSCG00000013545	TUBB4A	57.5342	1.78588	1.78609	TUBB4A
ENSSSCG00000013551	C3	4.1745	3.54311	5.59176	C3
ENSSSCG00000013553	VAV1	3.20823	5.15919	4.49153	VAV1
ENSSSCG00000013554	TRIP10	38.6759	64.4519	85.0705	TRIP10
ENSSSCG00000013569	PEX11G	1.02881	1.67111	1.38642	PEX11G
ENSSSCG00000013573	TRAPPC5	88.7643	126.535	130.969	TRAPPC5
ENSSSCG00000013584	PRR36	17.6923	2.90423	3.52405	PRR36
ENSSSCG00000013591	TIMM44	21.6351	21.6251	31.0803	TIMM44
ENSSSCG00000013594	FBN3	117.137	34.7254	32.5953	FBN3
ENSSSCG00000013598	KANK3	15.325	27.2649	55.1126	KANK3
ENSSSCG00000013599	ANGPTL4	12.7983	9.96312	17.1726	ANGPTL4
ENSSSCG00000013601	MARCHF2	6.80261	7.2997	9.627	MARCHF2
ENSSSCG00000013604	MYO1F	3.49389	5.49136	5.1213	MYO1F
ENSSSCG00000013614	CNN1	54.626	192.762	106.914	CNN1
ENSSSCG00000013615	ECSIT	26.0876	32.2675	52.8781	ECSIT
ENSSSCG00000013618	EPOR	1.75979	2.78714	2.16758	EPOR
ENSSSCG00000013622	TMEM205	51.5051	72.2126	73.999	TMEM205
ENSSSCG00000013642	PDE4A	4.39961	5.12978	7.31496	PDE4A
ENSSSCG00000013645	ATG4D	14.9283	19.4607	24.4381	ATG4D
ENSSSCG00000013663	ANGPTL6	38.2016	53.5695	13.4038	ANGPTL6
ENSSSCG00000013667	COL5A3	61.5641	197.17	124.212	COL5A3
ENSSSCG00000013723	protein_coding	10.6423	11.1241	14.0396	protein_coding
ENSSSCG00000013724	protein_coding	5.56809	53.3148	9.42907	protein_coding
ENSSSCG00000013742	NFIX	94.9965	129.714	148.07	NFIX
ENSSSCG00000013747	RAD23A	51.1689	54.9062	68.442	RAD23A
ENSSSCG00000013754	protein_coding	20.3028	3.15679	1.58271	protein_coding
ENSSSCG00000013760	C19orf57	4.05942	2.02506	1.27528	C19orf57
ENSSSCG00000013762	PODNL1	7.93201	1.86497	2.38285	PODNL1
ENSSSCG00000013771	PRKACA	232.262	597.279	497.252	PRKACA
ENSSSCG00000013773	ADGRL1	93.7782	28.5791	21.1622	ADGRL1
ENSSSCG00000013833	SLC1A6	13.8364	1.74075	0.967571	SLC1A6
ENSSSCG00000013864	TMEM38A	50.9366	202.213	422.732	TMEM38A
ENSSSCG00000013865	NWD1	0.454956	1.39867	1.95286	NWD1
ENSSSCG00000013869	protein_coding	21.7601	23.7419	11.0777	protein_coding
ENSSSCG00000013876	MYO9B	66.3311	26.7631	20.4943	MYO9B
ENSSSCG00000013885	FCHO1	2.00566	1.60615	0.735008	FCHO1
ENSSSCG00000013886	B3GNT3	9.67285	12.1268	19.827	B3GNT3
ENSSSCG00000013892	KCNN1	20.6891	6.22231	1.18326	KCNN1
ENSSSCG00000013897	RAB3A	72.3678	13.3292	13.9657	RAB3A
ENSSSCG00000013901	IFI30	16.4762	33.721	25.0116	IFI30
ENSSSCG00000013909	CRLF1	28.9671	18.7265	7.51303	CRLF1
ENSSSCG00000013911	TMEM59L	70.3647	11.3842	4.16793	TMEM59L
ENSSSCG00000013919	protein_coding	82.6463	139.729	101.973	protein_coding
ENSSSCG00000013932	LPAR2	14.7525	3.35477	2.00347	LPAR2
ENSSSCG00000013933	PBX4	16.1634	7.43518	5.27971	PBX4
ENSSSCG00000013936	NDUFA13	28.8992	26.5905	41.5165	NDUFA13
ENSSSCG00000013940	NLRP3	0.828516	1.2764	0.811577	NLRP3
ENSSSCG00000013989	GJC2	2.44298	4.14672	12.8577	GJC2
ENSSSCG00000014004	PLPP2	8.91905	2.63143	1.23023	PLPP2
ENSSSCG00000014011	RASGEF1C	0.970494	1.41384	2.71923	RASGEF1C
ENSSSCG00000014016	SQSTM1	111.615	140.404	209.926	SQSTM1
ENSSSCG00000014029	COL23A1	23.6462	10.753	1.435	COL23A1
ENSSSCG00000014034	N4BP3	42.8343	69.4577	47.5286	N4BP3
ENSSSCG00000014039	RGS14	5.57986	12.5812	2.15401	RGS14
ENSSSCG00000014047	FGFR4	88.0617	145.03	114.97	FGFR4
ENSSSCG00000014054	GPRIN1	21.4957	0.514687	0.514422	GPRIN1
ENSSSCG00000014058	CLTB	56.3401	71.9301	75.7804	CLTB
ENSSSCG00000014072	ENC1	31.9138	10.5927	5.44982	ENC1
ENSSSCG00000014076	FAM169A	11.0073	2.52863	0.904821	FAM169A
ENSSSCG00000014080	HMGCR	88.2667	24.2386	9.49165	HMGCR
ENSSSCG00000014097	protein_coding	2.3029	0.782265	0.389983	protein_coding
ENSSSCG00000014117	THBS4	596.738	1131.05	606.067	THBS4
ENSSSCG00000014128	CKMT2	2.11575	6.56718	17.3926	CKMT2
ENSSSCG00000014136	VCAN	130.627	68.1023	29.2694	VCAN
ENSSSCG00000014137	HAPLN1	271.678	10.606	8.49722	HAPLN1
ENSSSCG00000014148	TMEM161B	3.15065	1.20162	0.971084	TMEM161B
ENSSSCG00000014149	MEF2C	157.064	223.258	210.331	MEF2C
ENSSSCG00000014157	NR2F1	48.4432	10.7717	11.7903	NR2F1
ENSSSCG00000014163	SLF1	30.6702	31.2159	14.7692	SLF1
ENSSSCG00000014170	CAST	25.9314	37.8291	35.7157	CAST
ENSSSCG00000014171	ERAP1	6.29955	9.50409	15.154	ERAP1
ENSSSCG00000014179	FAM174A	19.438	33.5438	38.3479	FAM174A
ENSSSCG00000014203	MCC	28.2627	14.6417	8.76408	MCC
ENSSSCG00000014213	KCNN2	8.93326	9.80489	17.0968	KCNN2
ENSSSCG00000014214	TRIM36	4.16218	1.20237	0.693093	TRIM36
ENSSSCG00000014219	CDO1	76.6809	66.3506	21.241	CDO1
ENSSSCG00000014232	LOX	291.042	194.797	86.8146	LOX
ENSSSCG00000014235	SNCAIP	50.2954	15.3267	11.3012	SNCAIP
ENSSSCG00000014238	PRDM6	9.31269	1.38553	1.95235	PRDM6
ENSSSCG00000014255	SLC12A2	31.0191	13.7133	8.88635	SLC12A2
ENSSSCG00000014256	FBN2	332.033	128.82	48.5543	FBN2
ENSSSCG00000014272	protein_coding	2.81584	0.365985	0.181937	protein_coding
ENSSSCG00000014274	PDLIM4	53.3269	94.2308	88.1613	PDLIM4
ENSSSCG00000014277	IRF1	7.54408	6.75427	13.1388	IRF1
ENSSSCG00000014283	KIF3A	26.5291	8.16979	6.91876	KIF3A
ENSSSCG00000014289	UQCRQ	283.929	296.557	514.694	UQCRQ
ENSSSCG00000014291	AFF4	37.1255	19.4809	12.1968	AFF4
ENSSSCG00000014310	CXCL14	473.816	36.7523	42.7766	CXCL14
ENSSSCG00000014316	TGFBI	363.956	548.817	354.952	TGFBI
ENSSSCG00000014324	MYOT	97.3867	246.441	295.984	MYOT
ENSSSCG00000014326	KIF20A	92.6129	38.0565	25.6434	KIF20A
ENSSSCG00000014347	PROB1	84.9949	188.461	139.296	PROB1
ENSSSCG00000014348	protein_coding	18.3849	30.9161	33.1665	protein_coding
ENSSSCG00000014349	STING1	2.63166	5.71195	10.5787	STING1
ENSSSCG00000014351	protein_coding	23.4269	24.7381	44.0591	protein_coding
ENSSSCG00000014367	SLC35A4	12.5844	13.9316	17.0655	SLC35A4
ENSSSCG00000014369	CD14	8.29626	18.2307	16.0982	CD14
ENSSSCG00000014371	NDUFA2	66.0343	89.5085	127.76	NDUFA2
ENSSSCG00000014391	ARAP3	47.4531	49.7411	85.3223	ARAP3
ENSSSCG00000014395	PCDH12	19.2642	44.9694	83.4231	PCDH12
ENSSSCG00000014401	NR3C1	41.9532	52.3614	58.8148	NR3C1
ENSSSCG00000014420	JAKMIP2	9.74956	0.877269	0.106495	JAKMIP2
ENSSSCG00000014431	AFAP1L1	18.3877	42.8677	53.5113	AFAP1L1
ENSSSCG00000014434	IL17B	21.7631	48.6134	8.47717	IL17B
ENSSSCG00000014437	PPARGC1B	5.21843	13.1946	25.6559	PPARGC1B
ENSSSCG00000014441	CSF1R	24.1316	71.9721	80.1124	CSF1R
ENSSSCG00000014443	CAMK2A	86.6765	235.392	213.713	CAMK2A
ENSSSCG00000014448	ARSI	112.057	34.3823	11.9137	ARSI
ENSSSCG00000014565	protein_coding	17.1669	12.3569	26.8703	protein_coding
ENSSSCG00000014580	RIC3	8.39727	1.63613	2.52653	RIC3
ENSSSCG00000014598	PPFIBP2	10.3448	11.6411	14.7402	PPFIBP2
ENSSSCG00000014599	SYT9	3.10966	5.43874	7.53768	SYT9
ENSSSCG00000014600	protein_coding	1.52451	0.384812	0.382183	protein_coding
ENSSSCG00000014633	CAVIN3	283.172	290.219	400.337	CAVIN3
ENSSSCG00000014670	TRIM22	11.8966	14.8385	19.704	TRIM22
ENSSSCG00000014725	HBB	947.041	198.315	398.338	HBB
ENSSSCG00000014766	OR51E1	2.53242	1.22681	2.7007	OR51E1
ENSSSCG00000014792	STIM1	32.9179	52.1916	72.4962	STIM1
ENSSSCG00000014796	CHRNA10	4.1715	10.6195	11.2272	CHRNA10
ENSSSCG00000014819	ATG16L2	7.5692	7.68597	10.3011	ATG16L2
ENSSSCG00000014825	RELT	9.41937	14.7066	6.90655	RELT
ENSSSCG00000014829	MRPL48	10.8385	11.8415	15.8542	MRPL48
ENSSSCG00000014833	UCP2	29.924	96.0238	77.3933	UCP2
ENSSSCG00000014838	PGM2L1	14.602	5.09781	4.54483	PGM2L1
ENSSSCG00000014840	P4HA3	99.0075	53.4648	21.2439	P4HA3
ENSSSCG00000014843	CHRDL2	3.97608	11.0171	39.0689	CHRDL2
ENSSSCG00000014851	SLCO2B1	20.0471	23.9662	28.3097	SLCO2B1
ENSSSCG00000014853	GDPD5	18.4841	6.12528	8.62288	GDPD5
ENSSSCG00000014860	MAP6	16.4851	2.83047	1.85023	MAP6
ENSSSCG00000014869	LRRC32	24.7014	22.052	33.3678	LRRC32
ENSSSCG00000014880	AQP11	11.4585	5.98436	3.77746	AQP11
ENSSSCG00000014892	USP35	8.62423	3.055	2.06423	USP35
ENSSSCG00000014894	pseudogene	28.5906	8.09552	4.72164	pseudogene
ENSSSCG00000014897	FAM181B	16.9502	3.68622	6.67906	FAM181B
ENSSSCG00000014899	PRCP	46.0462	51.2944	93.1623	PRCP
ENSSSCG00000014904	DLG2	10.8104	3.06902	0.923686	DLG2
ENSSSCG00000014908	CCDC89	1.51325	2.09674	2.15628	CCDC89
ENSSSCG00000014924	CTSC	29.8876	9.96232	12.4923	CTSC
ENSSSCG00000014927	NOX4	7.31073	1.91065	2.01826	NOX4
ENSSSCG00000014935	protein_coding	22.1445	1.52074	1.14551	protein_coding
ENSSSCG00000014950	VSTM5	6.54526	2.28993	1.25406	VSTM5
ENSSSCG00000014965	ENDOD1	38.0149	58.2543	49.9833	ENDOD1
ENSSSCG00000014975	CNTN5	11.2226	0.89581	0.163861	CNTN5
ENSSSCG00000014976	ARHGAP42	18.9504	5.83183	3.11141	ARHGAP42
ENSSSCG00000014979	CEP126	4.91118	1.29823	0.892787	CEP126
ENSSSCG00000014997	protein_coding	15.1011	25.2499	23.6074	protein_coding
ENSSSCG00000015001	SLC35F2	9.65877	0.502673	0.955357	SLC35F2
ENSSSCG00000015002	ELMOD1	7.49545	0.941617	0.912487	ELMOD1
ENSSSCG00000015014	ZC3H12C	6.99094	3.31943	2.1101	ZC3H12C
ENSSSCG00000015015	ARHGAP20	8.5324	2.93813	2.34399	ARHGAP20
ENSSSCG00000015022	LAYN	15.913	10.1964	20.9771	LAYN
ENSSSCG00000015027	C11orf1	30.5621	66.6438	57.0117	C11orf1
ENSSSCG00000015034	SDHD	127.97	161.688	233.914	SDHD
ENSSSCG00000015035	C11orf52	2.75692	4.85031	4.45768	C11orf52
ENSSSCG00000015036	protein_coding	23.8029	4.85513	2.51439	protein_coding
ENSSSCG00000015040	PTS	3.15904	3.14825	4.49443	PTS
ENSSSCG00000015045	NCAM1	123.231	71.4073	40.694	NCAM1
ENSSSCG00000015052	USP28	38.6284	65.0456	62.867	USP28
ENSSSCG00000015084	protein_coding	11.5878	39.573	63.7533	protein_coding
ENSSSCG00000015085	IL10RA	2.96181	3.95695	6.59586	IL10RA
ENSSSCG00000015089	JAML	0.313848	0.255529	0.766257	JAML
ENSSSCG00000015090	MPZL3	2.28357	0.569072	0.294415	MPZL3
ENSSSCG00000015091	MPZL2	40.7064	2.70449	1.44977	MPZL2
ENSSSCG00000015116	MCAM	110.542	169.406	190.057	MCAM
ENSSSCG00000015119	MFRP	29.4384	46.6978	44.2478	MFRP
ENSSSCG00000015120	USP2	10.2975	18.7582	34.1452	USP2
ENSSSCG00000015125	NECTIN1	79.6298	41.0056	21.757	NECTIN1
ENSSSCG00000015131	GRIK4	4.96151	1.25123	2.0878	GRIK4
ENSSSCG00000015135	SORL1	5.22555	1.55545	5.01591	SORL1
ENSSSCG00000015175	VWA5A	8.42691	4.42382	2.26161	VWA5A
ENSSSCG00000015196	SIAE	6.05669	8.7109	10.1986	SIAE
ENSSSCG00000015200	ESAM	31.2464	51.6571	97.24	ESAM
ENSSSCG00000015202	ROBO3	7.19307	0.259271	0.319808	ROBO3
ENSSSCG00000015203	ROBO4	15.469	32.1105	60.4902	ROBO4
ENSSSCG00000015212	FEZ1	43.1294	3.40539	2.21948	FEZ1
ENSSSCG00000015234	KIRREL3	6.87138	0.762515	0.874972	KIRREL3
ENSSSCG00000015235	ETS1	61.5897	56.2967	82.4854	ETS1
ENSSSCG00000015237	FLI1	44.0177	44.497	59.1604	FLI1
ENSSSCG00000015238	ARHGAP32	18.9735	10.4352	5.61686	ARHGAP32
ENSSSCG00000015249	ADAMTS8	36.4715	52.7803	65.8503	ADAMTS8
ENSSSCG00000015253	NTM	20.3591	3.35149	2.03538	NTM
ENSSSCG00000015255	IGSF9B	12.1755	3.33012	1.33381	IGSF9B
ENSSSCG00000015259	B3GAT1	10.9646	0.897994	1.22134	B3GAT1
ENSSSCG00000015268	FMO1	6.48391	0.776976	8.92599	FMO1
ENSSSCG00000015270	FMOD	459.642	759.742	497.508	FMOD
ENSSSCG00000015276	ETNK2	9.41248	1.39594	0.9606	ETNK2
ENSSSCG00000015277	SOX13	14.8931	31.1131	45.652	SOX13
ENSSSCG00000015281	PLEKHA6	9.03323	2.55395	2.25715	PLEKHA6
ENSSSCG00000015283	PIK3C2B	37.4155	58.276	57.7871	PIK3C2B
ENSSSCG00000015285	LRRN2	35.7499	5.77593	2.9475	LRRN2
ENSSSCG00000015290	CDK18	15.5315	7.71603	3.73641	CDK18
ENSSSCG00000015297	ADAM22	18.6433	5.05398	5.43267	ADAM22
ENSSSCG00000015301	STEAP1	8.1916	2.61285	2.77312	STEAP1
ENSSSCG00000015307	CDK14	38.9458	12.5846	8.18116	CDK14
ENSSSCG00000015311	CYP51A1	81.3165	37.2659	15.3955	CYP51A1
ENSSSCG00000015314	ANKIB1	34.8187	14.1361	10.542	ANKIB1
ENSSSCG00000015320	CALCR	1.78911	8.94825	19.0834	CALCR
ENSSSCG00000015322	TFPI2	11.1467	24.6441	30.3901	TFPI2
ENSSSCG00000015326	COL1A2	5612.65	9298.13	5967.18	COL1A2
ENSSSCG00000015333	ASB4	4.81718	17.4196	10.8998	ASB4
ENSSSCG00000015334	PDK4	2.99157	3.21149	5.67367	PDK4
ENSSSCG00000015335	DYNC1I1	13.3144	2.43123	1.38395	DYNC1I1
ENSSSCG00000015340	ASNS	41.8991	125.145	40.3643	ASNS
ENSSSCG00000015342	COL28A1	0.811734	4.23137	1.94713	COL28A1
ENSSSCG00000015346	ICA1	1.18437	0.953384	1.85071	ICA1
ENSSSCG00000015350	THSD7A	11.3799	4.36126	2.81802	THSD7A
ENSSSCG00000015353	SCIN	10.576	1.20817	2.16521	SCIN
ENSSSCG00000015355	DGKB	5.40689	3.11383	0.704221	DGKB
ENSSSCG00000015362	TSPAN13	75.801	60.0994	117.092	TSPAN13
ENSSSCG00000015398	SEMA3A	39.9803	19.6515	10.9212	SEMA3A
ENSSSCG00000015399	SEMA3E	7.75112	0.951629	0.336292	SEMA3E
ENSSSCG00000015401	PCLO	2.37822	0.194677	0.0496366	PCLO
ENSSSCG00000015405	CD36	8.42757	33.2965	59.3615	CD36
ENSSSCG00000015413	FGL2	8.38346	44.7381	50.9699	FGL2
ENSSSCG00000015426	RELN	16.3319	3.73118	4.28813	RELN
ENSSSCG00000015433	CDHR3	0.795665	1.11222	1.71649	CDHR3
ENSSSCG00000015434	SYPL1	18.9103	17.9672	25.7606	SYPL1
ENSSSCG00000015435	NAMPT	6.61411	6.08816	10.2292	NAMPT
ENSSSCG00000015443	DLD	26.9984	20.0501	36.0899	DLD
ENSSSCG00000015445	NRCAM	14.7499	14.3906	5.79404	NRCAM
ENSSSCG00000015496	CENPL	4.72116	2.12886	1.50695	CENPL
ENSSSCG00000015507	TNN	6.38775	1.19982	0.537759	TNN
ENSSSCG00000015512	PAPPA2	14.7571	1.31053	1.9179	PAPPA2
ENSSSCG00000015513	ASTN1	27.8505	2.43266	0.946949	ASTN1
ENSSSCG00000015515	BRINP2	9.76671	0.807993	1.18002	BRINP2
ENSSSCG00000015519	RASAL2	15.2151	7.03849	4.83217	RASAL2
ENSSSCG00000015522	ANGPTL1	49.8642	73.249	70.3175	ANGPTL1
ENSSSCG00000015523	RALGPS2	35.8062	34.751	13.1449	RALGPS2
ENSSSCG00000015537	XPR1	10.3689	3.23826	2.32783	XPR1
ENSSSCG00000015541	IER5	30.915	54.1404	84.2147	IER5
ENSSSCG00000015543	CACNA1E	11.4168	2.02161	1.41701	CACNA1E
ENSSSCG00000015545	GLUL	125.081	180.868	218.323	GLUL
ENSSSCG00000015549	RNASEL	0.938142	1.49684	1.81679	RNASEL
ENSSSCG00000015550	RGS16	8.83327	16.2747	19.2027	RGS16
ENSSSCG00000015557	NMNAT2	18.1434	6.57301	5.53266	NMNAT2
ENSSSCG00000015559	NCF2	1.66592	2.56426	3.30922	NCF2
ENSSSCG00000015565	C1orf21	17.8666	25.3714	33.7221	C1orf21
ENSSSCG00000015570	IVNS1ABP	25.1865	20.8364	34.8941	IVNS1ABP
ENSSSCG00000015581	CENPF	38.7718	12.8521	7.9331	CENPF
ENSSSCG00000015582	PTPN14	26.3662	9.01341	11.7633	PTPN14
ENSSSCG00000015583	SMYD2	9.35576	10.6246	14.0343	SMYD2
ENSSSCG00000015589	VASH2	48.7863	24.2064	10.6505	VASH2
ENSSSCG00000015590	FLVCR1	8.53612	2.74637	2.39085	FLVCR1
ENSSSCG00000015595	ATF3	7.4346	6.65791	16.1827	ATF3
ENSSSCG00000015599	PPP2R5A	41.6855	44.4599	59.4779	PPP2R5A
ENSSSCG00000015600	DTL	6.42609	2.2278	1.38667	DTL
ENSSSCG00000015607	HHAT	14.4294	6.40264	4.1662	HHAT
ENSSSCG00000015612	IRF6	4.02919	0.854243	0.991957	IRF6
ENSSSCG00000015616	HSD11B1	11.3773	10.4284	20.3419	HSD11B1
ENSSSCG00000015617	G0S2	17.8036	25.832	140.022	G0S2
ENSSSCG00000015618	LAMB3	15.2336	3.87154	10.9718	LAMB3
ENSSSCG00000015619	CAMK1G	7.86511	0.939477	1.06395	CAMK1G
ENSSSCG00000015632	protein_coding	32.8415	224.407	226.862	protein_coding
ENSSSCG00000015644	IKBKE	5.08603	2.31635	1.47812	IKBKE
ENSSSCG00000015649	DYRK3	5.04571	4.02783	6.99731	DYRK3
ENSSSCG00000015650	MAPKAPK2	88.7525	99.0434	123.271	MAPKAPK2
ENSSSCG00000015664	protein_coding	19.0431	1.46861	0.954788	protein_coding
ENSSSCG00000015669	ACVR2A	24.8963	8.10483	9.55009	ACVR2A
ENSSSCG00000015671	ARHGAP15	0.371203	0.646515	1.58371	ARHGAP15
ENSSSCG00000015694	ZRANB3	5.91562	4.66799	1.85211	ZRANB3
ENSSSCG00000015720	BIN1	134.153	529.366	677.914	BIN1
ENSSSCG00000015742	TMEM177	8.79614	3.81685	7.17211	TMEM177
ENSSSCG00000015743	PTPN4	5.25552	4.89622	7.66527	PTPN4
ENSSSCG00000015747	protein_coding	38.1354	240.724	237.988	protein_coding
ENSSSCG00000015748	CSMD1	2.34522	0.69313	0.0619504	CSMD1
ENSSSCG00000015766	WDR17	2.83312	0.579632	0.525804	WDR17
ENSSSCG00000015774	TENM3	90.5824	33.3478	19.9495	TENM3
ENSSSCG00000015780	STOX2	15.8764	3.80067	2.41352	STOX2
ENSSSCG00000015781	ENPP6	54.337	7.72601	5.16808	ENPP6
ENSSSCG00000015782	IRF2	10.5652	14.92	17.2838	IRF2
ENSSSCG00000015784	ACSL1	14.231	21.8765	78.5139	ACSL1
ENSSSCG00000015786	PRIMPOL	4.88224	1.78862	1.60338	PRIMPOL
ENSSSCG00000015790	SLC25A4	39.7773	171.098	443.415	SLC25A4
ENSSSCG00000015795	protein_coding	0.745737	0.698532	1.31009	protein_coding
ENSSSCG00000015796	PDLIM3	7.70669	17.6539	53.0208	PDLIM3
ENSSSCG00000015810	protein_coding	1.17053	1.84981	1.68647	protein_coding
ENSSSCG00000015820	NSD3	45.648	18.9004	15.0513	NSD3
ENSSSCG00000015823	protein_coding	6.33726	1.17825	1.46395	protein_coding
ENSSSCG00000015839	NRG1	3.88306	0.406827	0.24128	NRG1
ENSSSCG00000015846	RBPMS	15.7451	10.5688	20.3826	RBPMS
ENSSSCG00000015862	LIMS2	15.5201	60.5485	69.2298	LIMS2
ENSSSCG00000015866	FMNL2	38.4589	13.2755	8.12017	FMNL2
ENSSSCG00000015871	NR4A2	19.1186	27.8534	34.5633	NR4A2
ENSSSCG00000015885	PLA2R1	7.05069	0.941013	1.13799	PLA2R1
ENSSSCG00000015886	ITGB6	4.41758	11.1685	16.8658	ITGB6
ENSSSCG00000015893	SLC4A10	2.03505	0.234069	0.159442	SLC4A10
ENSSSCG00000015894	DPP4	7.6041	20.5209	22.0262	DPP4
ENSSSCG00000015897	IFIH1	0.583616	1.48299	1.52434	IFIH1
ENSSSCG00000015898	KCNH7	1.24506	2.47161	0.828077	KCNH7
ENSSSCG00000015905	SCN2A	4.09312	0.479853	0.147634	SCN2A
ENSSSCG00000015906	CSRNP3	4.73269	1.9916	0.873931	CSRNP3
ENSSSCG00000015913	SCN9A	5.19663	0.277954	0.122464	SCN9A
ENSSSCG00000015917	XIRP2	23.4084	50.2558	53.9559	XIRP2
ENSSSCG00000015923	NOSTRIN	1.71169	3.47176	7.2058	NOSTRIN
ENSSSCG00000015931	KLHL41	141.11	580.488	625.388	KLHL41
ENSSSCG00000015933	FASTKD1	5.74419	8.88937	11.0388	FASTKD1
ENSSSCG00000015955	ITGA6	44.197	76.9988	50.9788	ITGA6
ENSSSCG00000015960	MAP3K20	23.413	50.324	66.0165	MAP3K20
ENSSSCG00000015969	CHRNA1	221.722	130.382	71.8116	CHRNA1
ENSSSCG00000015985	HOXD3	27.2949	6.56389	7.77242	HOXD3
ENSSSCG00000015986	HOXD1	19.8056	21.734	8.30437	HOXD1
ENSSSCG00000015987	NFE2L2	37.6706	40.9136	54.5386	NFE2L2
ENSSSCG00000016009	ITGA4	14.1448	6.99208	2.88467	ITGA4
[truncated: 2,126 more rows]
